# Supplementary material for: Photocatalytic activity of Rose Bengal encapsulated in zeolitic imidazolate framework-8 (RB@ZIF-8): an innovative approach for the one pot synthesis of highly functionalized tetrahydropyridines and study of their anti-tubercular activity
Source: Royal Society of Chemistry journal article supplement (doi:10.1039/d4cy00218k), 2024-01-01
Supplement: d4cy00218k1.pdf [file d4cy00218k1.pdf]

## SUPPLEMENTARY INFORMATION

### Photo Catalytic Activity of Rose Bengal Encapsulated on Zeolitic Imidazolate Framework-8 (RB@ZIF-8): A Innovative Approach for the One Pot Synthesis of Highly Functionalized Tetrahydropyridines and Study of their Anti-tubercular Activity.

Munmee Goswami a, Pooja Paul a, Chayan Pandya b, Ridahunlang Nongkhlaw a, Arup Dutta a, Jyothi Kumari c, Dharmarajan Sriram c, Akella Sivaramakrishna b, Rishanlang Nongkhlaw a,\*

*a Centre for Advanced Studies in Chemistry, North Eastern Hill University, Shillong 793022, India*  
*b Department of Chemistry, Vellore Institute of Technology (VIT), Vellore Tamil Nadu 632014, India*  
*c Department of Pharmacy, BITS Pilani, Hyderabad Campus, 500078, India*  
*\*Corresponding author E-mail address: rlnongkhlaw@gmail.com*

| Sl. No. | Table of Contents                                                         | Page No. |
|---------|---------------------------------------------------------------------------|----------|
| I       | General Information                                                       | S2       |
| II      | Preparation of RB@ZIF-8 composite photocatalyst                           | S2       |
| III     | Characterization of RB@ZIF-8 composite photocatalyst                      | S3-S5    |
| IV      | General methods of compound synthesis                                     | S5       |
| V       | Recycling Experiment                                                      | S5-6     |
| VI      | Calculation of Green Chemistry matrices                                   | S6-S8    |
| VII     | Analytical and spectroscopic data of the synthesized compounds            | S8-S27   |
| VIII    | <sup>1</sup> H & <sup>13</sup> C NMR Spectra of the synthesized compounds | S27-S67  |
| IX      | Evaluation of Anti-tubercular activities                                  | S67      |
| X       | References                                                                | S68      |

---

## I. General Information

All the chemicals were bought from Alfa Aesar, Spectrochem, Sigma-Aldrich & Merck and were used without any further purification. The purity of the prepared compounds were confirmed by using FT-IR,  $^1\text{H-NMR}$ ,  $^{13}\text{C-NMR}$ . The HR-MS data for novel derivatives also provided. FT-IR spectra were recorded in KBr pellets on a Bruker ALPHA II spectrometer and the frequencies are expressed in  $\text{cm}^{-1}$ .  $^1\text{H-NMR}$  and  $^{13}\text{C-NMR}$  spectra were recorded on a Bruker Avance II-400 spectrometer in  $\text{CDCl}_3$  solvent. Mass spectral data of the newly synthesized compounds were recorded on Waters, Xevo G2-XS QToF Mass Spectrometer. Powder XRD analysis was conducted using Powder XRD Make: Rigaku (Model: SmartLab SE). All reactions were monitored by thin layer chromatography (TLC) using pre-coated aluminum sheets (silica gel 60 F 254 0.2 mm thickness) and developed in an iodine and UV-light chamber. Melting points were recorded in capillary tubes using OPTICS Technology. TEM were conducted using a transmission electron microscope of JEM-2100 make (JEOL). SEM and EDX analyses were carried out using Zeiss, model: Sigma 300 make scanning electron microscope and Gemini 500 FE-SEM. TGA analysis was conducted on a Perkin Elmer STA-6000. 24 W LED light was used as visible light source

## II. Preparation of RB@ZIF-8 photocatalyst

### Preparation of ZIF-8 and RB@ZIF-8 NPs

ZIF-8 nanoparticles (ZIF-8 NPs) were prepared on the word of a previously published protocol [S1]. Briefly, in 300 mL methanol, 4.5 gm of  $\text{Zn}(\text{NO}_3)_2 \cdot 6\text{H}_2\text{O}$  (15 mmol) and 9.9 gm of 2-methylimidazole (2-MI)(0.12 mol) were dissolved (solution prepared separately in 150 ml methanol each) and the solution was stirred at room temperature. The resulting solid precipitate was collected through centrifugation, washed with methanol and dried in a vacuum oven at  $40^\circ\text{C}$  for 12 hour. Similarly, RB@ZIF-8 NPs were also prepared with a minor modification. 4.5 gm of  $\text{Zn}(\text{NO}_3)_2 \cdot 6\text{H}_2\text{O}$  (15 mmol) was dissolved in 150 mL methanol, followed by adding 150 mL of methanol containing 9.9 gm of 2-MI (0.12 mol) and 200 mg of RB (0.19 mmol) and stirred at room temperature. Afterwards, the suspension was centrifuged at 12000 rpm for 8 min to obtain RB@ZIF-8 NPs, which were washed with methanol, dried in vacuum and stored at dry environment [S2].

### III. Characterization of RB@ZIF-8 NPs

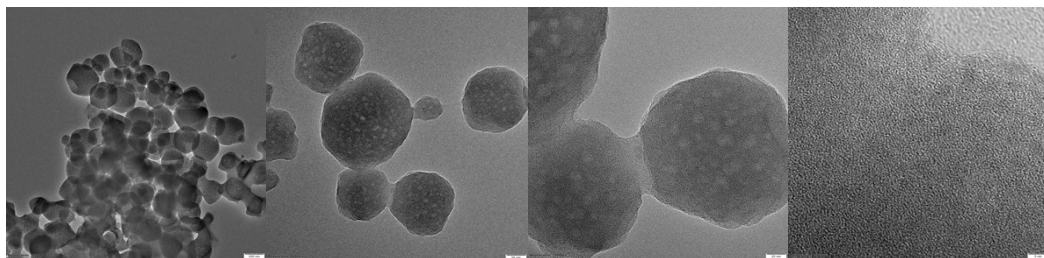

Figure S1. TEM mages of the prepared RB@ZIF-8

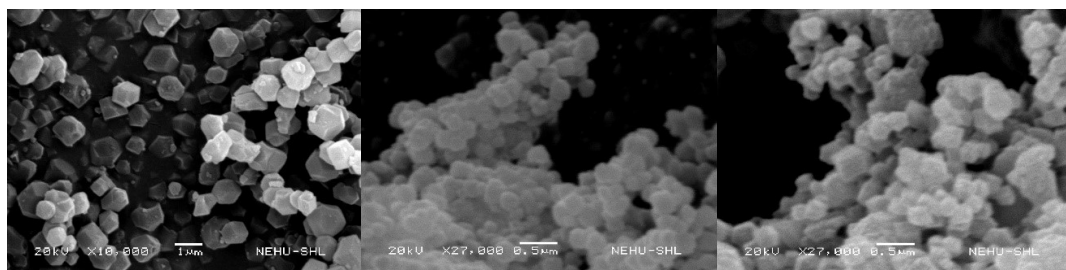

Figure S2. SEM images of (A) ZIF-8, (B) RB@ZIF-8 and (C) Recovered RB@ZIF-8

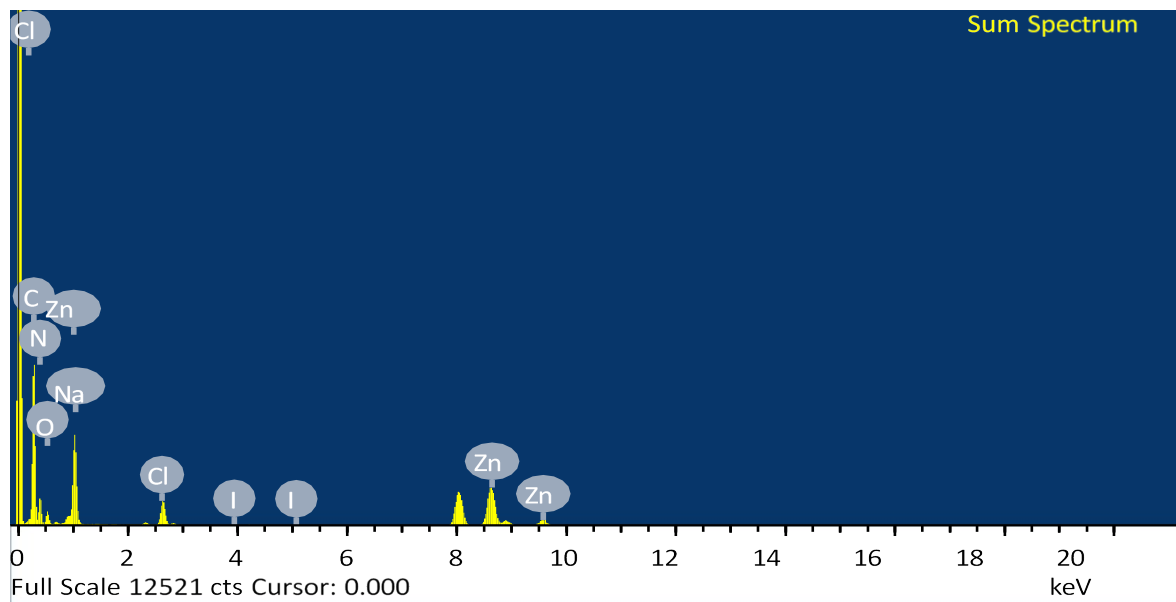

Figure S3. EDS peaks of the prepared RB@ZIF-8

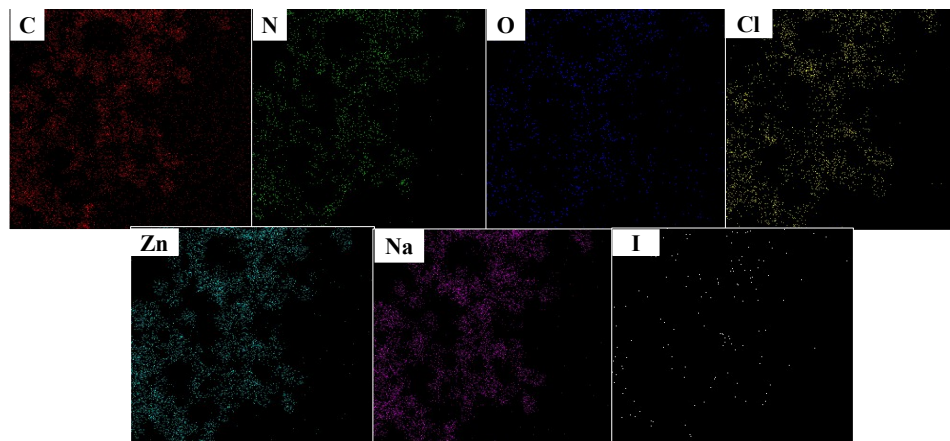

**Figure S4.** Elementary mapping of the prepared RB@ZIF-8

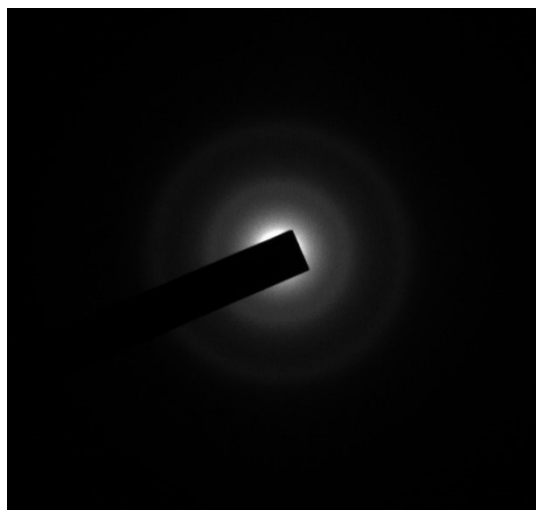

**Figure S5.** SAED pattern of recovered catalyst

The band gap of the catalyst is calculated by using Tauc method [S3] as given below

$$\alpha = \frac{A(h\nu - E_g)^n}{h\nu} \quad \text{or} \quad (\alpha h\nu)^{\frac{1}{n}} = A^{\frac{1}{n}} h\nu - A^{\frac{1}{n}} E_g$$

Where,  $\alpha = \frac{\ln(1/T)}{x}$  = absorption coefficient, T = Transmittance, x = thickness of the sample,  $E_g$  = band gap of the material, n = 2, 1/2, 2/3 and 1/3 for direct allowed, indirect allowed, direct forbidden and indirect forbidden.

By plotting a graph of  $(\alpha h\nu)^{\frac{1}{n}}$  vs  $h\nu$ , we got slope as  $A^{\frac{1}{n}}$  and y intercept as  $A^{\frac{1}{n}} E_g$ . dividing y intercept by  $A^{\frac{1}{n}}$ , we can estimate the band gap.

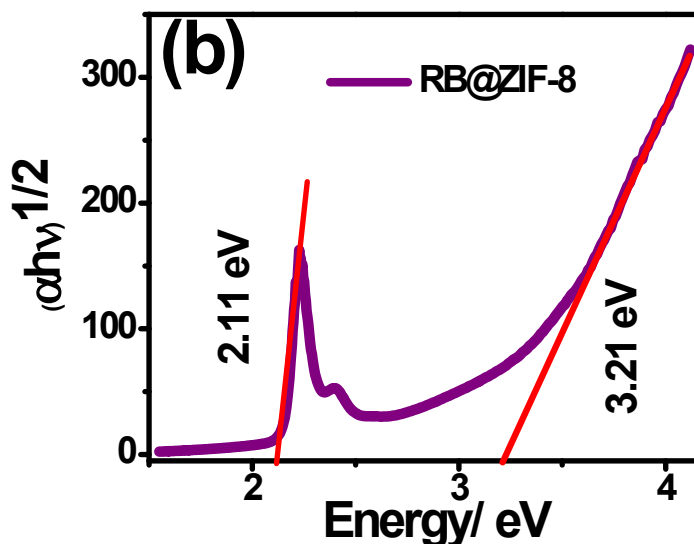

Figure S6. Tauc plot of RB@ZIF-8 for Band Gap energy calculation

#### IV. General methods of compound synthesis

##### *General method for the synthesis of tetrahydropyridine derivatives*

In a round bottom flask, a mixture of methyl acetoacetate (1 mmol), aniline (2 mmol), benzaldehyde (2 mmol) and RB@ZIF-8 (25 mg) in 5 mL of ethanol was magnetically stirred under 24W LED light for required times. The progress of the reaction was monitored by TLC. After completion, the catalyst was recovered by simple centrifugation and washed with ethanol and dried it for next run and the pure product was obtained by washing with ethanol or recrystallization from hot ethanol wherever it's needed.

#### V. Recycling experiments

In a round bottom flask, a mixture of methylacetoacetate (1 mmol), benzaldehyde (2 mmol) and aniline (2 mmol) in 5 mL of ethanol was stirred under 24W LED light in presence of RB@ZIF-8 for 10 min at room temperature. After completion of the reaction, simple centrifugation method was used to separate the RB@ZIF-8 from the reaction system. The recovered RB@ZIF-8 was washed three times with ethanol. The ethanol solution was combined with reaction solution and

evaporated to dry the solvent. The remaining residue was mixed with internal standard and the mixture was subjected for  $^1\text{H}$  NMR quantification. The washed RB@ZIF-8 was then dried in an oven and used for the next round of photocatalysis. The catalyst can be reused up to six times without significant loss of the catalytic activity.

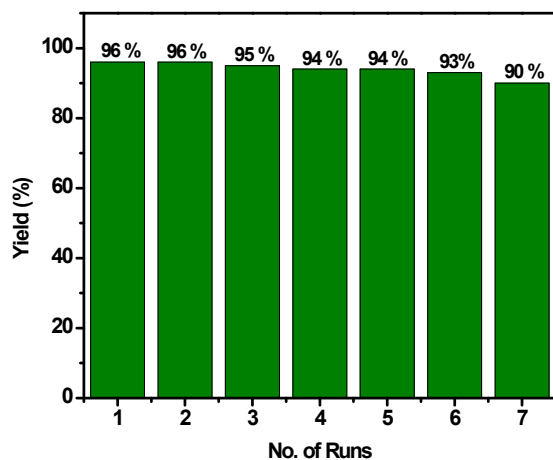

**Figure S5.** Recyclability of RB@ZIF-8 in the synthesis of **4a**

**VI. Green chemistry matrix calculations for 4a:** Green chemistry matrix has been calculated for the reaction on the basis of following parameters below.

- (i) Atom economy (AE)
- (ii) Reaction mass efficiency (RME)
- (iii) Environmental factor (E-factor)
- (iv) Product mass intensity (PMI)

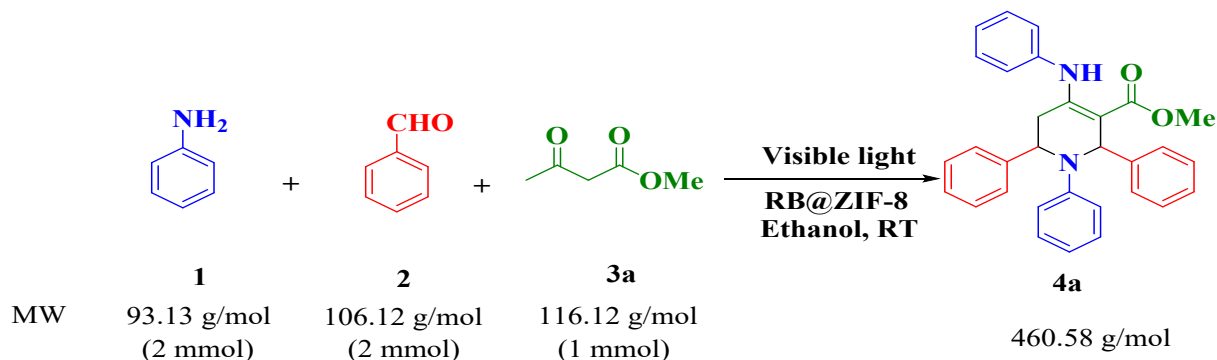

- (i) **Atom economy (AE) for 4a:** Atom economy define the efficacy of a chemical reaction with regard to how many atoms from the starting materials reside within the product.

Higher the value of AE, greener is the reaction. The ideal value of AE factor is 100% which indicates that all atoms from the starting materials reside in the product.

$$\begin{aligned}
 AE &= \frac{MW \text{ of the Product}}{\Sigma (MW \text{ of stoichiometric reactants})} \times 100 \\
 &= \frac{460.58}{(93.13 \times 2) + (106.12 \times 2) + (116.12 \times 1)} \times 100 \\
 &= \frac{460.58}{514.62} \times 100 \\
 &= 89 \%
 \end{aligned}$$

**(ii) Reaction mass efficiency (RME) for 4a:** Reaction mass efficiency is calculated by following equation,

$$\begin{aligned}
 RME &= \frac{Mass \text{ of the Product}}{\Sigma (MW \text{ of stoichiometric reactants})} \times 100 \\
 &= \frac{442.15}{(93.13 \times 2) + (106.12 \times 2) + (116.12 \times 1)} \times 100 \\
 &= \frac{442.15}{514.62} \times 100 \\
 &= 85.9 \%
 \end{aligned}$$

**(iii) E-factor or environmental factor for 4a:** E-factor implies the total amount of waste generated during a chemical reaction. The ideal value of E-factor is zero

$$E\text{-factor} = \frac{Mass \text{ of waste}}{Mass \text{ of Product}}$$

Where, mass of waste = (total mass of raw materials) – (the total mass of product)

$$E - Factor = \frac{[(93.13 \times 2) + (106.12 \times 2) + (116.12 \times 1)] - 442.15 \text{ mg}}{442.15 \text{ mg}}$$

$$\begin{aligned}
 & \frac{[186.26 + 212.24 + 116.12] - 442.15}{442.15} \text{ mg} \\
 = & \frac{72.47}{442.15} \\
 = & 0.16
 \end{aligned}$$

(iv) **Product mass intensity (PMI) for 4a:** PMI can be calculated by the following equation,

$$\begin{aligned}
 \text{PMI} &= \frac{\Sigma (\text{mass of stoichiometric reactants} + \text{solvent})}{\text{mass of product}} \\
 &= \frac{(93.13 \times 2) + (106.12 \times 2) + (116.12 \times 1) + 46.06}{442.15} \\
 &= \frac{512.62 + 46.06}{442.15} \\
 &= 1.26
 \end{aligned}$$

## VII. Analytical and spectroscopic data of the synthesized compounds

### Methyl-1,2,5,6-tetrahydro-1,2,6-triphenyl-4-(phenylamino)pyridine-3-carboxylate, 4a

White solid. Melting point: 194-196 °C. IR (KBr):  $\nu_{\text{max}}$  3251, 3025, 2949, 2867, 1661, 1587, 1500, 1451, 1377, 1323, 1256, 1186, 1078, 982, 929, 752, 699  $\text{cm}^{-1}$ :  $^1\text{H}$  NMR (400 MHz,  $\text{CDCl}_3$ )  $\delta$  10.23 (s, 1H), 7.29 (t,  $J = 6.5$  Hz, 3H), 7.25-7.18 (m, 4H), 7.17-7.11 (m, 2H), 7.10 – 7.01 (m, 6H), 6.58 (t,  $J = 7.2$  Hz, 1H), 6.50 (d,  $J = 8.3$  Hz, 2H), 6.43 (s, 1H), 6.29 – 6.23 (m, 2H), 5.13 (d,  $J = 3.9$  Hz, 1H), 3.91 (s, 3H), 2.85 (dd,  $J = 15.1, 5.7$  Hz, 1H), 2.74 (dd,  $J = 15.1, 2.4$  Hz, 1H) ppm.  $^{13}\text{C}$  NMR (101 MHz,  $\text{CDCl}_3$ )  $\delta$  168.7, 156.4, 147.0, 144.0, 142.8, 137.9, 129.0, 128.9, 128.7, 128.3, 127.2, 126.7, 126.5, 126.4, 125.9, 125.9, 116.2, 113.0, 98.0, 58.3, 55.2, 51.1, 33.7 ppm.

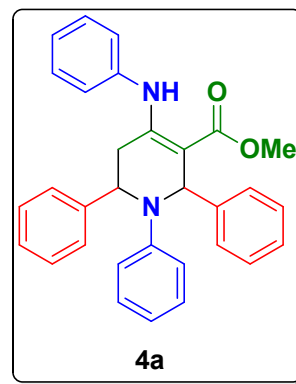

(s,

### Methyl-4-(p-tolylamino)-1,2,5,6-tetrahydro-2,6-diphenyl-1-p-tolylpyridine-3-carboxylate, 4b



White solid. Melting Point: 220-222 °C. IR (KBr):  $\nu_{\max}$  3258, 3025, 2945, 2862, 1656, 1594, 1516, 1451, 1318, 1257, 1076, 832, 700  $\text{cm}^{-1}$ .  $^1\text{H}$  NMR (500 MHz,  $\text{CDCl}_3$ )  $\delta$  10.17 (s, 1H), 7.33 -7.16 (m, 10H), 6.90-6.83 (m, 4H), 6.42 (d,  $J = 4.1$  Hz, 3H), 6.15 (d,  $J = 7.9$  Hz, 2H), 5.12 (s, 1H), 3.93 (s, 3H), 2.85-2.72 (m, 2H), 2.26 (s, 3H), 2.16 (s, 3H) ppm.  $^{13}\text{C}$  NMR (126 MHz,  $\text{CDCl}_3$ )  $\delta$  168.6, 156.6, 144.8, 144.2, 143.0, 135.6, 135.1, 129.4, 129.4, 128.6, 128.2, 127.0, 126.6, 126.4, 126.2, 126.0, 125.0, 112.8, 97.4, 58.2, 55.1, 50.9, 33.5, 20.9, 20.1 ppm.

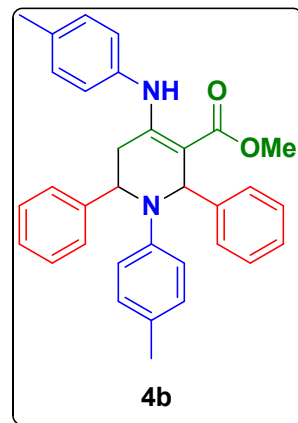

### Methyl-4-(p-tolylamino)-1,2,5,6-tetrahydro-1,2,6-trip-tolylpyridine-3-carboxylate, 4c

White solid. Melting point: 204-206 °C. IR (KBr):  $\nu_{\max}$  3251, 3022, 2919, 2855, 1906, 1657, 1596, 1457, 1369, 1259, 1182, 1021, 948, 793, 661  $\text{cm}^{-1}$ .  $^1\text{H}$  NMR (500 MHz,  $\text{CDCl}_3$ )  $\delta$  10.17 (s, 1H), 7.20 (d,  $J = 7.9$  Hz, 2H), 7.09-7.04 (m, 6H), 6.89 (d,  $J = 8.0$  Hz, 2H), 6.87 (d,  $J = 8.5$  Hz, 2H), 6.43 (d,  $J = 8.5$  Hz, 2H), 6.36 (s, 1H), 6.18 (d,  $J = 8.0$  Hz, 2H), 5.08 (s, 1H), 3.91 (s, 3H), 2.82 (dd,  $J = 15.1$ , 5.6 Hz, 1H), 2.73 (d,  $J = 15.0$ , 2.4 Hz, 1H), 2.34 (s, 3H), 2.32 (s, 3H), 2.27 (s, 3H), 2.16 (s, 3H) ppm.  $^{13}\text{C}$  NMR (100 MHz,  $\text{CDCl}_3$ )  $\delta$  168.6, 156.6, 144.9, 141.2, 139.9, 136.5, 135.6, 135.5, 135.2, 129.4, 129.4, 129.2, 128.9, 126.5, 126.3, 125.9, 124.8, 112.8, 97.5, 57.9, 55.0, 50.9, 33.5, 21.1, 21.0, 20.9, 20.1 ppm.

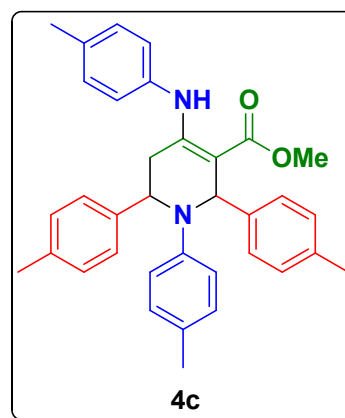

### Methyl-1,2,5,6-tetrahydro-2,6-bis(4-methoxyphenyl)-1-phenyl-4-phenylamino)pyridine-3-carboxylate, 4d

White solid. Melting point: 187-189 °C. IR (KBr):  $\nu_{\max}$  3243, 3062, 2951, 2838, 1654, 1593, 1505, 1454, 1372, 1250, 1185, 1072, 1034, 830, 760, 698  $\text{cm}^{-1}$ .  $^1\text{H}$  NMR (400 MHz,  $\text{CDCl}_3$ )  $\delta$  10.27 (s, 1H), 7.22 (d,  $J = 8.6$  Hz, 2H), 7.05-7.14 (m, 7H), 6.82 (d,  $J = 8.3$  Hz, 4H), 6.61 (t,

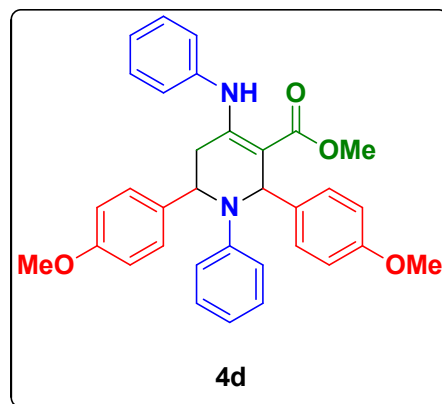

= 7.2 Hz, 1H), 6.53 (d,  $J = 8.3$  Hz, 2H), 6.36 - 6.37 (m, 3H), 5.09 (s, 1H), 3.93 (s, 3H), 3.80 (s, 3H), 3.78 (s, 3H), 2.86 (dd,  $J = 15.0, 5.5$  Hz, 1H), 2.76 (dd,  $J = 15.0, 2.5$  Hz, 1H) ppm.  $^{13}\text{C}$  NMR (100 MHz,  $\text{CDCl}_3$ )  $\delta$  168.7, 158.8, 158.1, 156.5, 147.1, 138.0, 135.9, 134.7, 128.9, 128.9, 127.8, 127.5, 125.8, 125.7, 116.1, 114.1, 113.6, 113.0, 98.2, 57.6, 55.4, 55.3, 54.6, 51.1, 33.8 ppm.

**Methyl-4-(p-tolylamino)-2,6-bis(4-bromophenyl)-1,2,5,6-tetrahydro-1-p-tolylpyridine-3-carboxylate, 4e**

White solid. M.P. 195-197  $^{\circ}\text{C}$ . IR (KBr):  $\nu_{\text{max}}$  3232, 3085, 2922, 2857, 1656, 1624, 1516, 1314, 1252, 1138, 1071, 1013, 925, 794, 536  $\text{cm}^{-1}$ .  $^1\text{H}$  NMR (400 MHz,  $\text{CDCl}_3$ )  $\delta$  10.15 (s, 1H), 7.38 (d,  $J = 8.4$  Hz, 4H), 7.17 (d,  $J = 8.3$  Hz, 2H), 6.98 (dd,  $J = 16.0, 8.2$  Hz, 4H), 6.88 (d,  $J = 8.4$  Hz, 2H), 6.35 (d,  $J = 8.6$  Hz, 2H), 6.28 (d,  $J = 7.9$  Hz, 3H), 5.04 (s, 1H), 3.90 (s, 3H), 2.77 (dd,  $J = 15.2, 5.4$  Hz, 1H), 2.69 (dd,  $J = 15.2, 2.5$  Hz, 1H), 2.29 (s, 3H), 2.17 (s, 3H).  $^{13}\text{C}$  NMR (100 MHz,  $\text{CDCl}_3$ )  $\delta$  168.3, 156.3, 144.2, 143.2, 141.73, 136.0, 134.91, 131.69, 131.30, 129.6, 128.4, 128.2, 125.9, 125.8, 120.8, 120.1, 120.0, 112.9, 96.9, 57.3, 54.8, 51.1, 33.5, 20.9, 20.1 ppm.

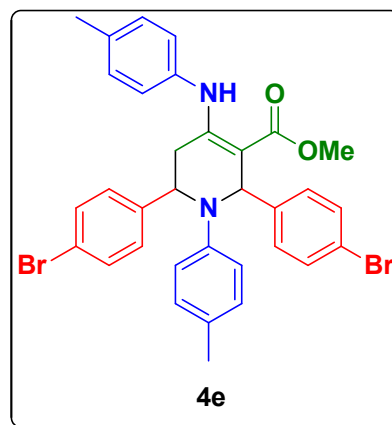

**Methyl-4-(4-ethylphenylamino)-1-(4-ethylphenyl)-1,2,5,6-tetrahydro-2,6-bis(4-methoxyphenyl)pyridine-3-carboxylate, 4f**

White solid. Melting Point: 202-206  $^{\circ}\text{C}$ . IR (KBr):  $\nu_{\text{max}}$  3256, 3065, 2960, 2866, 1654, 1611, 1512, 1458, 1374, 1248, 1189, 1073, 1032, 981, 812  $\text{cm}^{-1}$ .  $^1\text{H}$  NMR (400 MHz,  $\text{CDCl}_3$ )  $\delta$  10.20 (s, 1H), 7.24 - 7.20 (m, 2H), 7.11 - 7.05 (m, 2H), 6.92 (dd,  $J = 15.3, 8.5, 1.9$  Hz, 4H), 6.82 (dd,  $J = 8.6, 3.6, 1.8$  Hz, 4H), 6.49 - 6.42 (m, 2H), 6.35 - 6.31 (m, 1H), 6.29 - 6.22 (m, 2H), 5.06 (s, 1H), 3.91 (s, 3H), 3.80 (s, 3H), 3.78 (s, 3H), 2.82

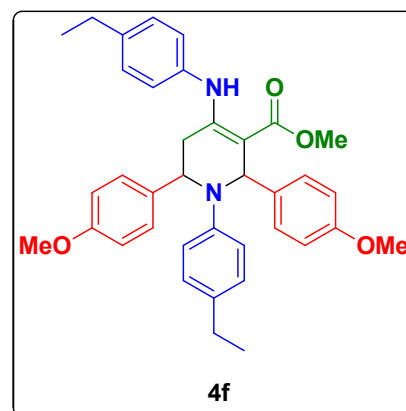

(dd,  $J = 15.1, 5.1$  Hz, 1H), 2.73 (d,  $J = 15.0$  Hz, 1H), 2.57 (q,  $J = 7.5$  Hz, 2H), 2.47 (q,  $J = 7.5$  Hz, 2H), 1.19 (t,  $J = 7.6$  Hz, 3H), 1.13 (t,  $J = 7.5$  Hz, 3H) ppm.  $^{13}\text{C}$  NMR (100 MHz,  $\text{CDCl}_3$ )  $\delta$  158.0, 156.8, 145.2, 136.3, 135.5, 135.1, 131.5, 128.3, 128.2, 127.8, 127.6, 126.0, 114.0, 113.6, 113.0, 97.7, 57.6, 55.4, 55.3, 54.8, 51.0, 33.8, 28.3, 27.7, 15.7, 15.5 ppm. HRMS (ESI): calcd Exact Mass: 576.2988; found 576.2985

**Methyl-4-(4-chlorophenylamino)-1-(4-chlorophenyl)-1,2,5,6-tetrahydro-2,6-bis(4-methoxyphenyl)pyridine-3-carboxylate, 4g**

White solid. Melting point: 194-196 °C. IR (KBr):  $\nu_{\text{max}}$  3239, 3000, 2947, 1661, 1608, 1501, 1447, 1375, 1252, 1181, 1073, 978, 760, 1012, 812  $\text{cm}^{-1}$ .  $^1\text{H}$  NMR (400 MHz,  $\text{CDCl}_3$ )  $\delta$  10.21 (s, 1H), 7.17 (d,  $J = 8.5$  Hz, 2H), 7.09-6.98 (m, 6H), 6.82 (dd,  $J = 8.5, 4.4$  Hz, 4H), 6.43 (d,  $J = 9.0$  Hz, 2H), 6.27 (t, 3H), 5.05 (s, 1H), 3.93 (s, 3H), 3.80 (s, 3H), 3.78 (s, 3H), 2.83 (dd,  $J = 15.1, 5.6$  Hz, 1H), 2.68 (dd,  $J = 14.8, 1.8$  Hz, 1H) ppm.  $^{13}\text{C}$  NMR (100 MHz,  $\text{CDCl}_3$ )  $\delta$  168.5, 158.9, 158.2, 155.6, 145.5, 136.4, 135.0, 134.0, 131.3, 129.0, 128.6, 127.5, 127.3, 127.0, 121.1, 114.1, 114.0, 114.0, 113.7, 113.6, 98.6, 57.6, 55.3, 55.2, 54.7, 33.6 ppm.

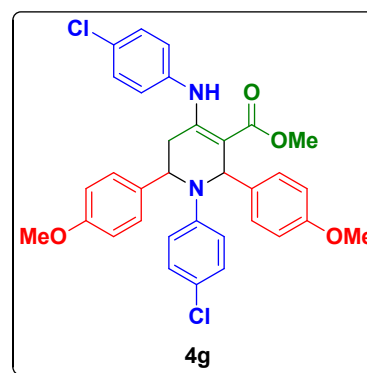

**Methyl-4-(4-chlorophenylamino)-1-(4-chlorophenyl)-1,2,5,6-tetrahydro-2,6-dip-tolylpyridine-3-carboxylate, 4h**

White solid; Melting point: 184-186 °C. IR (KBr):  $\nu_{\text{max}}$  3260, 2954, 2858, 1650, 1604, 1497, 1375, 1264, 1084, 929, 852, 757, 652  $\text{cm}^{-1}$ .  $^1\text{H}$  NMR (400 MHz,  $\text{CDCl}_3$ )  $\delta$  10.19 (s, 1H), 7.21 – 6.94 (m, 12H), 6.43 (d,  $J = 8.8$  Hz, 2H), 6.32 (s, 1H), 6.19 (d,  $J = 8.3$  Hz, 2H), 5.07 (s, 1H), 3.93 (s, 3H), 2.85 (dd,  $J = 15.1, 5.5$  Hz, 1H), 2.69 (d,  $J = 14.9$  Hz, 1H), 2.35 (s, 3H), 2.32 (s, 3H) ppm.  $^{13}\text{C}$  NMR (101 MHz,  $\text{CDCl}_3$ )  $\delta$  168.6, 155.6, 145.6, 140.2, 139.2, 137.1, 136.5, 136.2, 131.4, 129.5, 129.1, 129.0, 128.7,

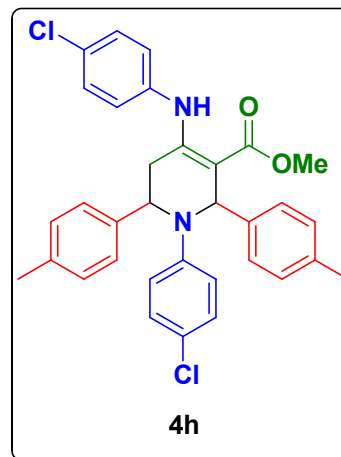

127.1, 126.5, 126.2, 121.1, 114.0, 98.6, 58.1, 55.1, 51.2, 33.6, 21.2, 21.1 ppm.

**Methyl-2,6-bis(4-fluorophenyl)-1,2,5,6-tetrahydro-1-phenyl-4-(phenylamino)pyridine-3-carboxylate, 4i**

White solid. Melting point: 182-184 °C. IR (KBr):  $\nu_{\max}$  3258, 3046, 2949, 2860, 1658, 1593, 1469, 1369, 1267, 1196, 1074, 1013, 829, 793, 694  $\text{cm}^{-1}$ .  $^1\text{H}$  NMR (400 MHz,  $\text{CDCl}_3$ )  $\delta$  10.27 (s, 1H), 7.28 (s, 1H), 7.24 (s, 1H), 7.19-7.05 (m, 7H), 6.96 (t,  $J$  8.6 Hz, 4H), 6.64 (t,  $J$  = 7.2 Hz, 1H), 6.48 (d,  $J$  = 8.5 Hz, 2H), 6.39 (dd,  $J$  = 9.5, 2.7 Hz, 3H), 5.12 (s, 1H), 3.93 (s, 3H), 2.84 (dd,  $J$  = 15.1, 5.5 Hz, 1H), 2.75 (dd,  $J$  = 15.1, 2.4 Hz, 1H) ppm.

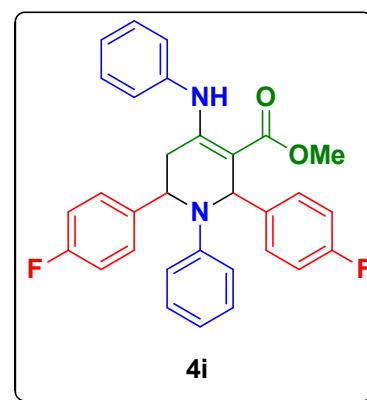

$^{13}\text{C}$  NMR (100 MHz,  $\text{CDCl}_3$ )  $\delta$  168.5, 163.3, 162.8, 160.8, 160.4, 156.2, 146.7, 139.4, 138.2, 137.7, 129.1, 128.3, 128.2, 128.0, 127.9, 126.1, 125.8, 116.7, 115.7, 115.5, 115.2, 115.0, 113.0, 97.8, 57.4, 54.7, 51.2, 33.9 ppm.

**Methyl-2,6-bis(3-chlorophenyl)-1,2,5,6-tetrahydro-1-phenyl-4-(phenylamino)pyridine-3-carboxylate, 4j**

White solid. Melting point: 130-132 °C. IR (KBr):  $\nu_{\max}$  3242, 3062, 2948, 2869, 1656, 1598, 1521, 1399, 1266, 1180, 1072, 1012, 859, 747, 695  $\text{cm}^{-1}$ .  $^1\text{H}$  NMR (400 MHz,  $\text{CDCl}_3$ )  $\delta$  10.25 (s, 1H), 7.24 (s, 5H), 7.20 – 7.03 (m, 8H), 6.65 (t,  $J$  = 7.1 Hz, 1H), 6.43 (dd,  $J$  = 19.4, 7.6 Hz, 4H), 6.36 (s, 1H), 5.10 (s, 1H), 3.92 (s, 3H), 2.83 (dd,  $J$  = 15.1, 5.4 Hz, 1H), 2.74 (d,  $J$  = 13.7 Hz, 1H) ppm.  $^{13}\text{C}$  NMR (100 MHz,  $\text{CDCl}_3$ )  $\delta$  168.4, 156.1,

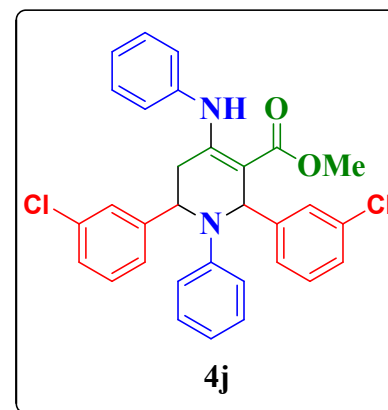

146.5, 142.4, 141.0, 137.6, 132.9, 132.2, 129.1, 129.1, 128.9, 128.5, 128.1, 127.8, 126.1, 125.8, 116.8, 113.0, 97.6, 57.4, 54.8, 51.3, 33.7 ppm.

**Methyl-4-(4-ethylphenylamino)-1-(4-ethylphenyl)-2,6-bis(4-fluorophenyl)-1,2,5,6-tetrahydropyridine-3-carboxylate, 4k**

White solid; Melting point: 220-222 °C. IR (KBr):  $\nu_{\max}$  3260, 3052, 2962, 2866, 1654, 1595, 1455, 1374, 1255, 1230, 1226, 1189, 1073, 1017, 979, 826, 668  $\text{cm}^{-1}$ .  $^1\text{H}$  NMR (400 MHz,  $\text{CDCl}_3$ )  $\delta$  10.19 (s, 1H), 7.25 (s, 1H), 7.11 (s, 2H), 6.93 (dd,  $J = 19.7$ , 6.9 Hz, 9H), 6.40 (d,  $J = 7.8$  Hz, 2H), 6.33 (s, 1H), 6.28 (d,  $J = 7.4$  Hz, 2H), 5.08 (s, 1H), 3.91 (s, 3H), 2.75 (dd, 2H), 2.57 (q,  $J = 6.8$  Hz, 2H), 2.47 (q,  $J = 6.7$  Hz, 2H), 1.19 (t,  $J = 7.3$  Hz, 3H), 1.12 ( $J = 7.3$  Hz, 3H).  $^{13}\text{C}$  NMR (100 MHz,  $\text{CDCl}_3$ )  $\delta$  168.2, 156.3,

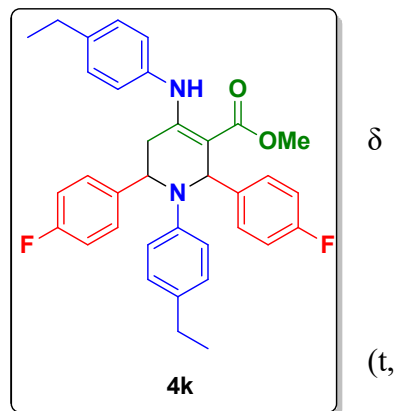

144.4, 142.0, 134.9, 131.8, 128.1, 128.1, 127.9, 127.9, 127.7, 127.7, 125.7, 115.3, 115.1, 114.8, 114.6, 112.7, 97.0, 57.1, 54.5, 50.8, 33.5, 28.0, 27.4, 15.4, 15.2 ppm. HRMS (ESI): calcd 552.2588; found 552.2598

**Methyl-4-(4-bromophenylamino)-1-(4-bromophenyl)-1,2,5,6-tetrahydro-2,6-bis(3,4,5-trimethoxyphenyl)pyridine-3-carboxylate, 4l**

White solid; Melting point: 136-138 °C. IR (KBr):  $\nu_{\max}$  3252, 3069, 2994, 2833, 1657, 1590, 1496, 1373, 1255, 1186, 1073, 1038, 960, 779, 698  $\text{cm}^{-1}$ .  $^1\text{H}$  NMR (400 MHz,  $\text{CDCl}_3$ )  $\delta$  10.17 (s, 1H), 7.28 (s, 1H), 7.16 (d,  $J = 8.7$  Hz, 2H), 6.49 – 6.38 (m, 4H), 6.33 – 6.21 (m, 6H), 4.98 (s, 1H), 3.90 (s, 3H), 3.84 (s, 3H), 3.83 (s, 3H), 3.74 (s, 6H), 3.70 (s, 6H), 2.93 (dd,  $J = 14.9$ , 5.2 Hz, 1H), 2.70 (d,  $J = 14.6$  Hz, 1H) ppm.  $^{13}\text{C}$  NMR (100 MHz,  $\text{CDCl}_3$ )  $\delta$  168.3, 156.2, 153.5, 153.2, 145.9, 138.8, 137.6,

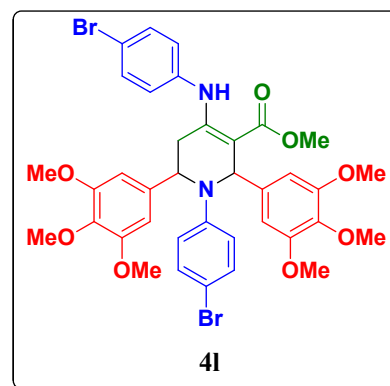

137.2, 136.9, 136.8, 132.0, 131.6, 127.8, 119.7, 114.7, 108.9, 103.8, 103.0, 97.9, 61.0, 60.9, 58.4, 56.1, 56.1, 55.7, 51.2, 33.7 ppm. HRMS (ESI): calcd 796.0995; found 796.0978.

**Methyl-4-(4-bromophenylamino)-1-(4-bromophenyl)-1,2,5,6-tetrahydro-2,6-bis(4-methoxyphenyl)pyridine-3-carboxylate, 4m**

White solid. Melting point: 178-180 °C. IR (KBr):  $\nu_{\max}$  3240, 3062, 2996, 2835, 1659, 1607, 1494, 1374, 1251, 1179, 1071, 1034, 807, 756  $\text{cm}^{-1}$ .  $^1\text{H}$  NMR (400 MHz,  $\text{CDCl}_3$ )  $\delta$  10.21 (s, 1H), 7.23 (d,  $J = 8.5$  Hz, 2H), 7.14 (dd,  $J = 15.9, 8.8$  Hz, 4H), 7.04 (d,  $J = 8.6$  Hz, 2H), 6.82 (dd,  $J = 8.6, 3.9$  Hz, 4H), 6.39 (d,  $J = 9.0$  Hz, 2H), 6.28 (s, 1H), 6.20 (d,  $J = 8.5$  Hz, 2H), 5.03 (s, 1H), 3.93 (s, 3H), 3.80 (s, 3H), 3.78 (s, 3H), 2.83 (dd,  $J = 15.1, 5.6$  Hz, 1H), 2.69 (dd,  $J =$

15.0, 2.0 Hz, 1H).  $^{13}\text{C}$  NMR (100 MHz,  $\text{CDCl}_3$ )  $\delta$  168.6, 159.0, 158.3, 155.6, 165.0, 137.0, 135.0, 134.0, 132.1, 131.6, 127.6, 127.4, 127.3, 114.7, 114.2, 113.8, 108.4, 98.8, 57.6, 55.4, 55.3, 54.7, 51.3, 33.6 ppm.

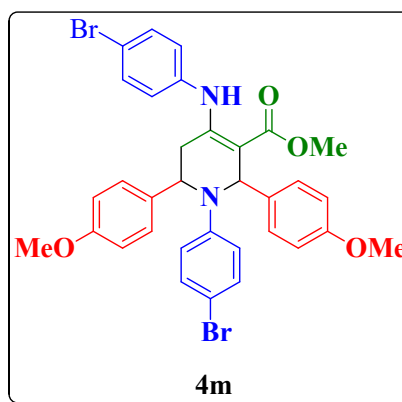

**Methyl-4-(4-ethylphenylamino)-1-(4-ethylphenyl)-1,2,5,6-tetrahydro-2,6-dip-tolylpyridine-3-carboxylate, 4n**

White solid. Melting point: 178-180 °C. IR (KBr):  $\nu_{\max}$  3262, 3089, 2960, 2865, 1655, 1595, 1454, 1372, 1254, 1186, 1073, 1022, 786, 690  $\text{cm}^{-1}$ .  $^1\text{H}$  NMR (400 MHz,  $\text{CDCl}_3$ )  $\delta$  10.17 (s, 1H), 7.20 (d,  $J = 7.1$  Hz, 2H), 7.12 – 7.03 (m, 6H), 6.90 (t,  $J = 7.4$  Hz, 4H), 6.45 (d,  $J = 7.7$  Hz, 2H), 6.35 (s, 1H), 6.19 (d,  $J = 7.3$  Hz, 2H), 5.08 (s, 1H), 3.90 (s, 3H), 2.82 (dd,  $J = 14.7, 4.5$  Hz, 1H), 2.73 (d,  $J = 14.7$  Hz, 1H), 2.56 (d,  $J = 7.3$  Hz, 2H), 2.46 (d,  $J = 7.3$  Hz, 2H), 2.34 (s, 3H), 2.32 (s, 3H), 1.18 (t,  $J = 7.2$  Hz, 3H), 1.11 (t,  $J = 7.2$  Hz, 3H) ppm.  $^{13}\text{C}$  NMR (100 MHz,

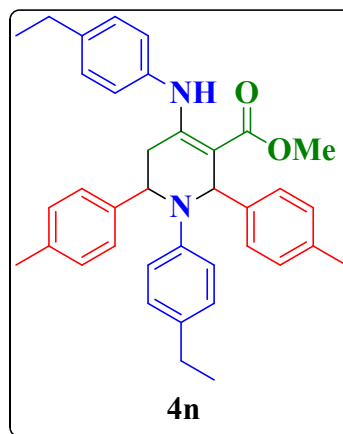

$\text{CDCl}_3$ )  $\delta$  168.7, 156.8, 145.2, 141.4, 140.1, 136.6, 135.5, 131.4, 129.3, 128.9, 128.2, 126.6, 126.4, 126.1, 112.9, 97.6, 58.0, 55.1, 51.0, 33.7, 28.3, 27.7, 21.2, 21.1, 15.8, 15.6 ppm.

**Methyl-4-(p-tolylamino)-1,2,5,6-tetrahydro-2,6-bis(4-methoxyphenyl)-1-p-tolylpyridine-3-carboxylate, 4o**

White solid. Melting point: 175-177 °C. IR (KBr):  $\nu_{\text{max}}$  3241, 3095, 2949, 2856, 1656, 1609, 1512, 1459, 1370, 1248, 1176, 1069, 1034, 799, 760 690  $\text{cm}^{-1}$ .  $^1\text{H}$  NMR (400 MHz,  $\text{CDCl}_3$ )  $\delta$  10.19 (s, 1H), 7.21 (d,  $J = 8.6$  Hz, 2H), 7.07 (d,  $J = 8.6$  Hz, 2H), 6.90 (dd,  $J = 17.3, 8.3$  Hz, 4H), 6.81 (dd,  $J = 8.8, 2.3$  Hz, 4H), 6.44 (d,  $J = 8.7$  Hz, 2H), 6.32 (s, 1H), 6.24 (d,  $J = 8.2$  Hz, 2H), 5.05 (s, 1H), 3.91 (s, 3H), 3.80 (s, 3H), 3.78 (s, 3H), 2.81

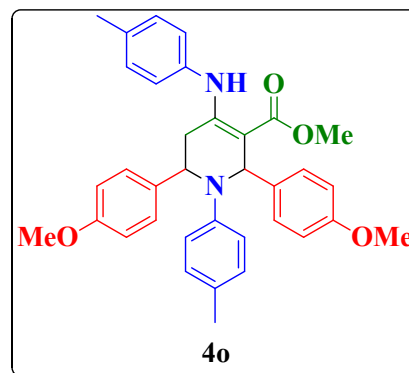

(dd,  $J = 14.7, 5.2$  Hz, 1H), 2.72 (dd,  $J = 15.0, 2.6$  Hz, 1H), 2.27 (s, 3H), 2.16 (s, 3H) ppm.  $^{13}\text{C}$  NMR (100 MHz,  $\text{CDCl}_3$ )  $\delta$  168.7, 158.7, 158.1, 156.8, 144.9, 135.6, 135.3, 135.0, 129.5, 129.5, 127.8, 127.6, 126.0, 125.0, 114.0, 113.6, 113.0, 97.6, 57.5, 55.4, 55.3, 54.7, 51.0, 33.7, 21.0, 20.2 ppm.

**Methyl-1-(benzo[d][1,3]dioxol-5-yl)-4-(benzo[d][1,3]dioxol-6-ylamino)-1,2,5,6-tetrahydro-2,6-diphenylpyridine-3-carboxylate, 4p**

White solid. Melting point: 166-168 °C. IR (KBr):  $\nu_{\text{max}}$  3212, 3064, 2946, 2864, 1660, 1589, 1485, 1399, 1288, 1230, 1185, 1071, 1010, 790, 697  $\text{cm}^{-1}$ .  $^1\text{H}$  NMR (400 MHz,  $\text{CDCl}_3$ )  $\delta$  10.02 (s, 1H), 7.28 (d,  $J = 6.5$  Hz, 1H), 7.25-7.13 (m, 7H), 6.49 (dd,  $J = 12.3, 8.4$  Hz, 2H), 6.27 (s, 1H), 6.14 (d,  $J = 2.4$  Hz, 1H), 5.88 (d,  $J = 7.5$  Hz, 3H), 5.73 (d,  $J = 5.1$  Hz, 3H), 5.67 (d,  $J = 1.9$  Hz, 1H), 5.02 (s, 1H), 3.88 (s, 3H), 2.77 (dd,  $J = 15.1, 5.8$  Hz, 1H), 2.63 (dd,  $J = 15.2, 2.4$  Hz, 1H) ppm.  $^{13}\text{C}$  NMR (126 MHz,  $\text{CDCl}_3$ )  $\delta$  168.6, 156.9, 148.2, 147.7, 146.9, 144.0, 143.2, 143.1, 138.6, 131.8, 128.8, 128.3, 127.3, 126.8,

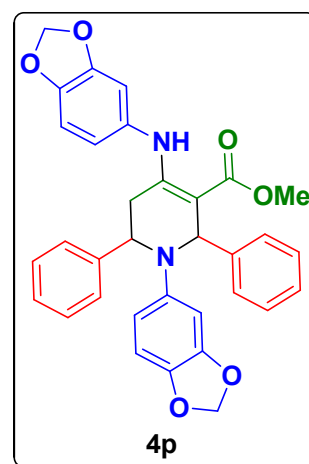

126.5, 126.4, 120.0, 108.4, 108.1, 107.9, 105.1, 101.5, 100.5, 97.4, 96.1, 58.7, 56.1, 51.0, 33.8 ppm. HRMS (ESI): calcd 548.1947; found 548.1962

**Methyl-1-(benzo[d][1,3]dioxol-5-yl)-4-(benzo[d][1,3]dioxol-6-ylamino)-1,2,5,6-tetrahydro-2,6-bis(4-methoxyphenyl)pyridine-3-carboxylate, 4q**

White solid. Melting point: 220-222 °C. IR (KBr):  $\nu_{\max}$

3274, 2989, 2946, 2894, 1656, 1586, 1488, 1351, 1291, 1222, 1185, 1098, 1036, 828, 778, 670  $\text{cm}^{-1}$ .  $^1\text{H}$  NMR (400 MHz,  $\text{CDCl}_3$ )  $\delta$  10.06 (s, 1H), 7.17 (d,  $J = 8.6$  Hz, 2H), 7.06 (d,  $J = 8.6$  Hz, 2H), 6.82 (t,  $J = 8.1$  Hz, 4H), 6.53 (dd,  $J = 8.4, 3.1$  Hz, 2H), 6.20 (s, 1H), 6.17 (d,  $J = 2.4$  Hz, 1H), 5.91 (dt,  $J = 8.6, 2.0$  Hz, 3H), 5.84 (dd,  $J = 8.2, 1.8$  Hz, 1H), 5.76 (d,  $J = 3.6$  Hz, 3H), 4.97 (s, 1H), 3.89 (s, 3H), 3.80 (s, 3H), 3.78 (s, 3H), 2.77 (dd,  $J = 15.1, 5.5$  Hz, 1H), 2.63 (dd,  $J = 15.1, 2.7$  Hz, 1H) ppm.  $^{13}\text{C}$  NMR (100 MHz,  $\text{CDCl}_3$ )  $\delta$

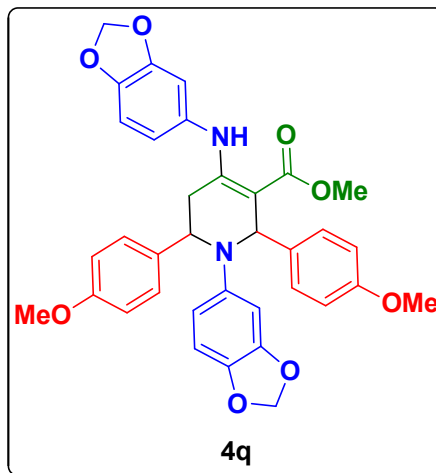

168.7, 158.8, 158.1, 157.0, 148.1, 147.7, 145.9, 143.3, 138.5, 135.4, 134.9, 131.9, 127.8, 127.5, 119.9, 114.1, 113.6, 108.3, 108.1, 107.9, 105.3, 101.5, 100.5, 97.4, 96.3, 57.9, 55.6, 55.4, 55.3, 51.0, 33.9 ppm. HRMS (ESI): calcd 608.2159; found 608.2166.

**Methyl-1-(benzo[d][1,3]dioxol-5-yl)-4-(benzo[d][1,3]dioxol-6-ylamino)-1,2,5,6-tetrahydro-2,6-dip-tolylpyridine-3-carboxylate, 4r**

White solid. Melting point: 198-200 °C. IR (KBr):  $\nu_{\max}$  3258,

2946, 2861, 1656, 1588, 1487, 1367, 1261, 1228, 1183, 1070, 1035, 840, 799, 657  $\text{cm}^{-1}$ .  $^1\text{H}$  NMR (400 MHz,  $\text{CDCl}_3$ )  $\delta$  10.03 (s, 1H), 7.16 (d,  $J = 8.0$  Hz, 2H), 7.10-7.01 (m, 6H), 6.51 (dd,  $J = 12.0, 8.4$  Hz, 2H), 6.24 (s, 1H), 6.16 (d,  $J = 2.5$  Hz, 1H), 5.92-5.89 (m, 3H), 5.79-5.74 (m, 3H), 5.68 (d,  $J = 2.0$  Hz, 1H), 5.00 (s, 1H), 3.90 (s, 3H), 2.79 (dd,  $J = 15.1, 5.7$  Hz, 1H), 2.63 (dd,  $J = 15.1, 2.6$  Hz, 1H), 2.34 (s, 3H), 2.32 (s, 3H) ppm.  $^{13}\text{C}$  NMR (100 MHz,  $\text{CDCl}_3$ )  $\delta$  168.4, 156.6, 1478.8, 147.4, 145.6, 143.0, 140.7,

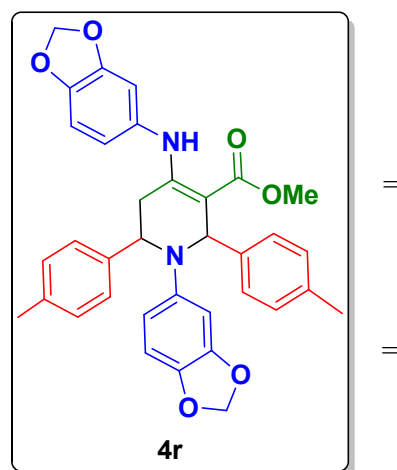



139.7, 138.1, 136.5, 135.5, 131.5, 129.1, 128.6, 126.4, 126.1, 119.7, 108.0, 107.8, 107.5, 104.7, 101.2, 100.1, 97.2, 97.8, 58.1, 55.5, 50.7, 33.5, 20.9, 20.8 ppm. HRMS (ESI): calcd 576.2260; found 576.2274

**Methyl-1-(benzo[d][1,3]dioxol-5-yl)-4-(benzo[d][1,3]dioxol-6-ylamino)-2,6-bis(4-chlorophenyl)-1,2,5,6-tetrahydropyridine-3-carboxylate, 4s**

White solid. Melting point: 196-198 °C. IR (KBr):  $\nu_{\max}$  3256, 2998, 2946, 2873, 1661, 1590, 1487, 1359, 1261, 1226, 1184, 1096, 1035, 816, 797, 657  $\text{cm}^{-1}$ .  $^1\text{H}$  NMR (400 MHz,  $\text{CDCl}_3$ )  $\delta$  10.06 (s, 1H), 7.28 (d,  $J = 2.3$  Hz, 2H), 7.24-7.19 (m, 4H), 7.07 (d,  $J = 8.4$  Hz, 2H), 6.56 (t,  $J = 8.8$  Hz, 2H), 6.20 (s, 1H), 6.10 (d,  $J = 2.4$  Hz, 1H), 5.95 (d,  $J = 4.6$  Hz, 2H), 5.88-5.83 (m, 3H), 5.80 (d,  $J = 4.4$  Hz, 2H), 4.99 (s, 1H), 3.90 (s, 3H), 2.75 (dd,  $J = 15.3, 5.6$  Hz, 1H), 2.65 (dd,  $J = 15.3, 2.8$  Hz, 1H) ppm.  $^{13}\text{C}$  NMR (100 MHz,  $\text{CDCl}_3$ )  $\delta$  168.4, 156.6, 148.3, 146.9, 146.2, 142.6, 142.3, 141.2, 139.1, 133.0, 132.2, 131.5, 128.9, 128.4, 128.2, 127.9, 119.9, 108.5, 108.0, 107.9, 105.4, 101.7, 100.7, 96.9, 96.3, 57.7, 55.8, 51.2, 33.8 ppm. HRMS (ESI): calcd 616.1168; found 616.1204 [ $\text{M}^+$ ], 618.1190 [ $\text{M}+2$ ]

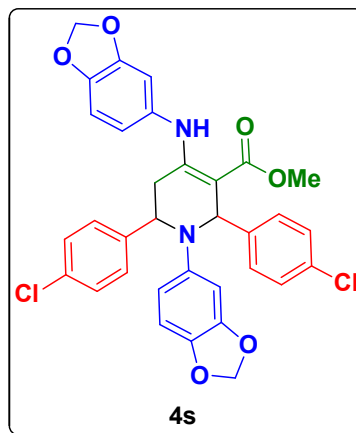

**Ethyl 1,2,5,6-tetrahydro-1,2,6-triphenyl-4-(phenylamino)pyridine-3-carboxylate, 5a**

White solid. Melting point: 173-175 °C. IR (KBr):  $\nu_{\max}$  3246, 3059, 2979, 2871, 1651, 1595, 1498, 1449, 1370, 1323, 1250, 1173, 1071, 1031, 916, 836, 723, 723, 697  $\text{cm}^{-1}$ .  $^1\text{H}$  NMR (400 MHz,  $\text{CDCl}_3$ )  $\delta$  10.29 (s, 1H), 7.34 (d,  $J = 7.4$  Hz, 2H), 7.30-7.28 (m, 3H), 7.25-7.16 (m, 5H), 7.12-7.04 (m, 5H), 6.62-6.59 (m, 1H), 6.53 (d,  $J = 8.2$  Hz, 2H), 6.46 (s, 1H), 6.29 (d,  $J = 7.8$  Hz, 2H), 5.15 (s, 1H), 4.50-4.42 (m, 1H), 4.37-4.28 (m, 1H), 2.88 (dd,  $J = 15.1, 5.7$  Hz, 1H), 2.77 (dd,  $J = 15.1, 2.4$  Hz, 1H), 1.47 (t,  $J = 7.1$  Hz, 3H) ppm.  $^{13}\text{C}$  NMR (100 MHz,  $\text{CDCl}_3$ )  $\delta$  168.9, 168.7, 157.7, 150.8, 147.3, 146.7, 144.4, 143.8, 143.1, 139.0, 138.2, 129.7, 129.3, 129.2, 129.1,

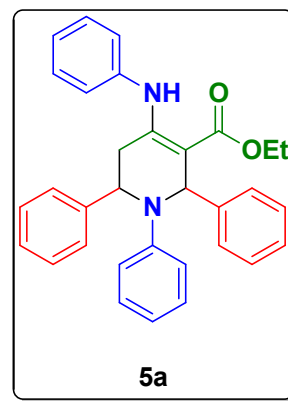

129.1, 129.0, 128.8, 128.6, 127.5, 127.4, 127.1, 127.0, 126.8, 126.7, 126.4, 126.1, 125.2, 124.1, 118.4, 116.5, 115.8, 113.3, 98.5, 98.3, 61.8, 60.9, 60.1, 60.1, 58.6, 55.4, 36.8, 34.0, 15.2, 14.9 ppm.

### Ethyl-4-(p-tolylamino)-1,2,5,6-tetrahydro-2,6-diphenyl-1-p-tolylpyridine-3-carboxylate, 5b

White solid. Melting point: 194-196 °C. IR (KBr):  $\nu_{\max}$  3239, 3059, 3025,

2919, 1650, 1615, 1594, 1515, 1449, 1315, 1250, 1074, 892, 773, 700  $\text{cm}^{-1}$ .

$^1\text{H}$  NMR (500 MHz,  $\text{CDCl}_3$ )  $\delta$  10.20 (s, 1H), 7.33 (d,  $J = 7.4$  Hz, 2H),

7.29-7.26 (m, 3H), 7.25-7.14 (m, 5H), 6.88 (m, 4H), 6.43 (d,  $J = 9.0$  Hz,

3H), 6.15 (d,  $J = 8.1$  Hz, 2H), 5.11 (s, 1H), 4.47-4.41 (m, 1H), 4.35-4.29

(m, 1H), 2.83 (dd,  $J = 15.1, 5.7$  Hz, 1H), 2.73 (dd,  $J = 15.1, 2.3$  Hz, 1H),

2.25 (s, 3H), 2.15 (s, 3H), 1.45 (t,  $J = 7.1$  Hz, 3H) ppm.  $^{13}\text{C}$  NMR (100

MHz,  $\text{CDCl}_3$ )  $\delta$  168.1, 156.3, 144.7, 144.2, 142.9, 135.4, 135.1, 129.3,

129.2, 128.4, 128.0, 126.9, 126.5, 126.3, 126.3, 126.0, 125.8, 124.9, 112.7, 97.6, 59.4, 58.1, 55.0,

33.4, 20.7, 20.0, 14.7 ppm.

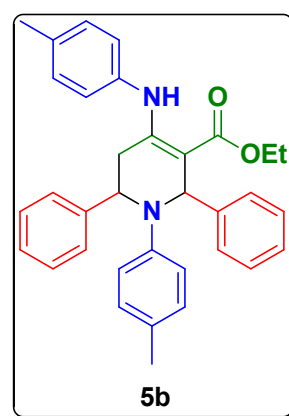

### Ethyl 4-(p-tolylamino)-1,2,5,6-tetrahydro-1,2,6-trip-tolylpyridine-3-carboxylate, 5c

White solid. Melting point: 171-172 °C. IR (KBr):  $\nu_{\max}$  3237, 3091,

3025, 2979, 2919, 2868, 1651, 1616, 1596, 1514, 1253, 1072, 795  $\text{cm}^{-1}$ .

$^1\text{H}$  NMR (400 MHz,  $\text{CDCl}_3$ )  $\delta$  10.20 (s, 1H), 7.21 (d,  $J = 8.0$  Hz, 2H),

7.08-7.03 (m, 4H), 6.87 (t,  $J = 8.1$  Hz, 4H), 6.43 (d,  $J = 8.7$  Hz, 2H),

6.36 (s, 1H), 6.17 (d,  $J = 8.2$  Hz, 2H), 5.07 (s, 1H), 4.43 (m, 1H), 4.35-

4.27 (m, 1H), 2.81 (dd,  $J = 15.1, 5.6$  Hz, 1H), 2.72 (dd,  $J = 15.0, 2.6$  Hz,

1H), 2.33 (s, 3H), 2.31 (s, 3H), 2.26 (s, 3H), 2.15 (s, 3H), 1.44 (t,  $J = 7.1$

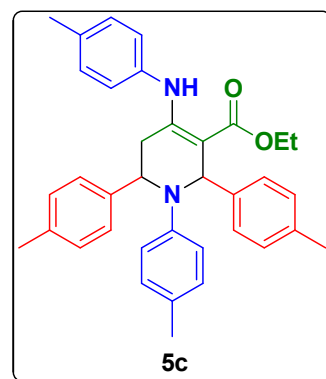

Hz, 3H) ppm.  $^{13}\text{C}$  NMR (100 MHz,  $\text{CDCl}_3$ ) ppm:  $\delta$  168.3, 156.4, 144.9, 141.4, 139.9, 136.4, 135.6, 135.3, 129.4, 129.3, 129.2, 128.8, 126.5, 126.3, 125.9, 112.8, 97.7, 59.5, 57.9, 54.9, 33.5, 21.1, 21.0, 20.9, 20.1, 14.8 ppm.

**Ethyl-4-(4-chlorophenylamino)-1-(4-chlorophenyl)-1,2,5,6-tetrahydro-2,6-di-*p*-tolylpyridine-3-carboxylate, 5d**

White solid. Melting point: 218-220  $^\circ\text{C}$ . IR (KBr):  $\nu_{\text{max}}$  3234, 3090, 2979, 2859, 1646, 1604, 1498, 1448, 1319, 1254, 1073, 848, 795, 759, 683  $\text{cm}^{-1}$ .  $^1\text{H}$  NMR (400 MHz,  $\text{CDCl}_3$ ):  $\delta$  10.24 (s, 1H), 7.16-6.98 (m, 12H), 6.43 (d,  $J = 7.5$  Hz, 2H), 6.33 (s, 1H), 6.19 (d,  $J = 7.1$  Hz, 2H), 5.07 (s, 1H), 4.52-4.44 (m, 1H), 4.34-4.27 (m, 1H), 2.85 (dd,  $J = 24, 4.0$  Hz, 1H), 2.69 (d,  $J = 14.7$  Hz, 1H), 2.34 (s, 3H), 2.32 (s, 3H), 1.46 (t,  $J = 8.0$ , 3H) ppm.  $^{13}\text{C}$  NMR (101 MHz,  $\text{CDCl}_3$ )  $\delta$  168.3, 155.5, 145.7, 140.4, 139.3, 137.1, 136.6, 136.2, 131.3, 129.5, 129.1, 129.0, 128.8, 127.0, 126.5, 126.3, 121.1, 114.1, 99.0, 59.9, 58.1, 55.1, 33.6, 21.2, 21.1, 14.8 ppm.

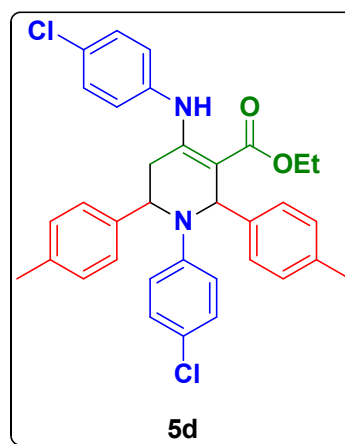

**Ethyl-4-(4-chlorophenylamino)-1-(4-chlorophenyl)-1,2,5,6-tetrahydro-2,6-diphenyl pyridine-3-carboxylate, 5e**

White solid. Melting point: 202-204  $^\circ\text{C}$ . IR (KBr):  $\nu_{\text{max}}$  3243, 3060, 2976, 2857, 1647, 1496, 1426, 1320, 1227, 1071, 941, 848, 803, 777, 698  $\text{cm}^{-1}$ .  $^1\text{H}$  NMR (400 MHz,  $\text{CDCl}_3$ )  $\delta$  10.21 (s, 1H), 7.26-7.20 (m, 9H), 7.12 (d,  $J = 7.0$  Hz, 1H), 7.02 (d,  $J = 8.2$  Hz, 2H), 6.97 (d,  $J = 8.5$  Hz, 2H), 6.40 (d,  $J = 8.8$  Hz, 2H), 6.36 (s, 1H), 6.15 (d,  $J = 8.2$  Hz, 2H), 5.08 (s, 1H), 4.50 – 4.38 (m, 1H), 4.36 – 4.25 (m, 1H), 2.83 (dd,  $J = 15.0, 5.3$  Hz, 1H), 2.67 (d,  $J = 14.8$  Hz, 1H), 1.45 (t,  $J = 6.9$  Hz, 3H).  $^{13}\text{C}$  NMR (101 MHz,  $\text{CDCl}_3$ )  $\delta$  164.4, 156.8, 145.6, 142.4, 140.4, 137.9,

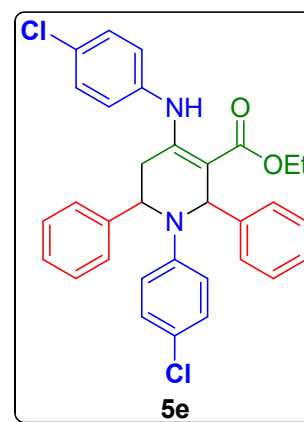

132.5, 131.5, 129.1, 128.9, 128.8, 128.5, 127.1, 126.6, 126.4, 117.9, 114.1, 98.7, 60.0, 58.3, 55.4, 33.6, 14.8 ppm.

**Ethyl-4-(4-chlorophenylamino)-1-(4-chlorophenyl)-1,2,5,6-tetrahydro-2,6-bis(4-methoxyphenyl)pyridine-3-carboxylate, 5f**

White solid. Melting point: 182-183 °C, IR (KBr):  $\nu_{\max}$  3454, 3101, 2962, 1647, 1608, 1502, 1364, 1249, 1071, 798  $\text{cm}^{-1}$ .  $^1\text{H}$  NMR (500 MHz,  $\text{CDCl}_3$ )  $\delta$  10.25 (s, 1H), 7.19 (d,  $J = 7.8$  Hz, 2H), 7.06 (dd,  $J = 15.4, 8.1$  Hz, 4H), 7.00 (d,  $J = 8.3$  Hz, 2H), 6.86 – 6.79 (m, 4H), 6.44 (d,  $J = 8.3$  Hz, 2H), 6.30 (s, 1H), 6.26 (d,  $J = 7.9$  Hz, 2H), 5.04 (s, 1H), 4.50 – 4.40 (m, 1H), 4.37 – 4.27 (m, 1H), 3.80 (s, 3H), 3.78 (s, 3H), 2.83 (dd,  $J = 15.6, 5.6$  Hz, 1H), 2.69 (d,  $J = 14.7$  Hz, 1H), 1.46 (t,  $J = 6.7$  Hz, 3H) ppm.  $^{13}\text{C}$  NMR (100 MHz,  $\text{CDCl}_3$ )  $\delta$  168.3,

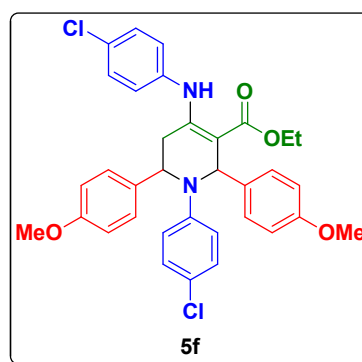

159.0, 155.5, 145.7, 136.7, 135.3, 134.2, 131.3, 129.1, 128.8, 127.7, 127.5, 127.0, 121.2, 114.2, 114.2, 113.8, 99.0, 60.0, 57.7, 55.4, 55.3, 54.9, 33.7, 14.9 ppm.

**Ethyl-4-(p-tolylamino)-2,6-bis(4-bromophenyl)-1,2,5,6-tetrahydro-1-p-tolylpyridine-3-carboxylate, 5g**

White solid. Melting point: 191-192 °C. IR (KBr): 3236, 3089, 2979, 2860, 1647, 1495, 1370, 1253, 1070, 896, 794  $\text{cm}^{-1}$ .  $^1\text{H}$  NMR (500 MHz,  $\text{CDCl}_3$ )  $\delta$  10.24 (s, 1H), 7.20 (d,  $J = 8.3$  Hz, 2H), 7.17 (d,  $J = 7.7$  Hz, 2H), 7.13 – 7.10 (m, 6H), 7.03 (d,  $J = 7.5$  Hz, 2H), 6.39 (d,  $J = 8.6$  Hz, 2H), 6.33 (s, 1H), 6.14 (d,  $J = 8.1$  Hz, 2H), 5.07 (s, 1H), 4.49-4.43 (m, 1H), 4.36 – 4.30 (m, 1H), 2.85 (dd,  $J = 15.1, 5.3$  Hz, 1H), 2.70 (d,  $J = 15.0$  Hz, 1H), 2.35 (s,

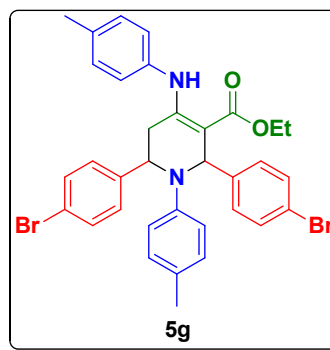

3H), 2.33 (s, 3H), 1.47 (t,  $J = 7.0$  Hz, 3H) ppm.  $^{13}\text{C}$  NMR (100 MHz,  $\text{CDCl}_3$ )  $\delta$  168.2, 155.3, 146.1,

140.3, 139.2, 137.1, 132.0, 131.6, 129.5, 129.2, 127.3, 126.5, 126.3, 114.6, 108.4, 99.1, 60.0, 58.1, 55.1, 33.6, 21.2, 21.1, 14.8 ppm.

**Ethyl-4-(4-methoxyphenylamino)-1,2,5,6-tetrahydro-1-(4-methoxyphenyl)-2,6-diphenylpyridine-3-carboxylate, 5h**

White solid. Melting point: 173-175 °C. IR (KBr):  $\nu_{\max}$  3247, 3047, 2981, 2834, 1652, 1607, 1511, 1460, 1319, 1243, 1068, 1038, 947, 845, 810, 736  $\text{cm}^{-1}$ .  $^1\text{H}$  NMR (500 MHz,  $\text{CDCl}_3$ )  $\delta$  10.14 (s, 1H), 7.21 (d,  $J = 7.7$  Hz, 2H), 7.10-7.05 (m, 6H), 6.66 (d,  $J = 9.1$  Hz, 2H), 6.62 (d,  $J = 8.7$  Hz, 2H), 6.46 (d,  $J = 9.0$  Hz, 2H), 6.29 (s, 1H), 6.23 (d,  $J = 8.6$  Hz, 2H), 5.02 (s, 1H), 4.46-4.40 (m, 1H), 4.33-4.27 (m, 1H), 3.75 (s, 3H), 3.66 (s, 3H), 2.79 (dd,  $J = 15.1, 5.6$  Hz, 1H),

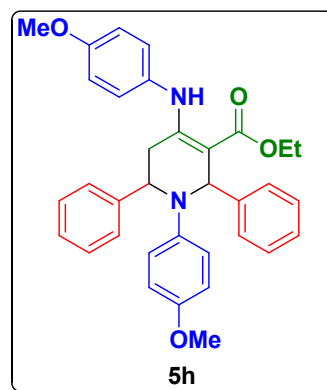

2.64 (dd,  $J = 15.0, 2.6$  Hz, 1H), 2.35 (s, 3H), 2.32 (s, 3H), 1.44 (t,  $J = 7.1$  Hz, 3H) ppm.  $^{13}\text{C}$  NMR (126 MHz,  $\text{CDCl}_3$ )  $\delta$  168.4, 156.9, 150.9, 141.8, 140.3, 136.6, 135.7, 131.0, 129.3, 128.9, 127.9, 126.8, 126.6, 114.6, 114.2, 114.0, 97.5, 59.5, 58.0, 55.7, 55.6, 55.5, 33.7, 21.2, 21.1, 14.9 ppm.

**Ethyl-4-(4-bromophenylamino)-1-(4-bromophenyl)-1,2,5,6-tetrahydro-2,6-bis(4-methoxyphenyl)pyridine-3-carboxylate, 5i**

White solid. Melting point: 218-220 °C. IR (KBr):  $\nu_{\max} = 3243, 3064, 2977, 2835, 1648, 1606, 1585, 1505, 1251, 1068, 1034, 757$   $\text{cm}^{-1}$ .  $^1\text{H}$  NMR (400 MHz,  $\text{CDCl}_3$ )  $\delta$  10.25 (s, 1H), 7.21 (dd,  $J = 17.0, 8.6$  Hz, 4H), 7.13 (d,  $J = 9.0$  Hz, 2H), 7.05 (d,  $J = 8.6$  Hz, 2H), 6.82 (dd,  $J = 8.8, 2.4$  Hz, 4H), 6.39 (d,  $J = 9.1$  Hz, 2H), 6.29 (s, 1H), 6.20 (d,  $J = 8.6$  Hz, 2H), 5.03 (s, 1H), 4.50 – 4.40 (m, 1H), 4.38 – 4.25 (m, 1H), 3.80 (s, 3H), 3.78 (s, 3H), 2.84 (dd,  $J = 15.1, 5.6$  Hz, 1H), 2.70 (dd,  $J = 15.1, 2.2$  Hz,

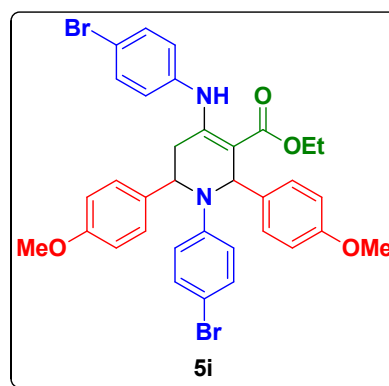

1H), 1.46 (t,  $J = 7.1$  Hz, 3H).  $^{13}\text{C}$  NMR (100 MHz,  $\text{CDCl}_3$ )  $\delta$  167.9, 158.7, 158.0, 155.1, 145.7,

136.8, 134.8, 133.7, 131.8, 131.3, 127.3, 127.1, 126.9, 114.4, 113.9, 113.5, 108.1, 98.8, 59.7, 57.4, 55.1, 55.0, 54.4, 33.3, 14.5 ppm.

**Ethyl-4-(p-tolylamino)-2,6-bis(4-chlorophenyl)-1,2,5,6-tetrahydro-1-p-tolylpyridine-3-carboxylate, 5j**

White Solid. Melting Point: 238-240 °C. IR (KBr):  $\nu_{\max}$  = 3249, 3095, 3065, 3032, 2981, 2921, 1654, 1618, 1593, 1516, 1255, 1074, 804  $\text{cm}^{-1}$ .  $^1\text{H}$  NMR (400 MHz,  $\text{CDCl}_3$ )  $\delta$  10.21 (s, 1H), 7.24 – 7.20 (m, 6H), 7.06 (d,  $J$  = 8.0 Hz, 2H), 6.95 (d,  $J$  = 8.0 Hz, 2H), 6.88 (d,  $J$  = 8.0 Hz, 2H), 6.36 (d,  $J$  = 7.4 Hz, 2H), 6.30 (d,  $J$  = 4.1 Hz, 2H), 6.28 (s, 1H), 5.04 (s, 1H), 4.47 – 4.40 (m, 1H), 4.35 – 4.28 (m, 1H), 2.77 (dd,  $J$  = 15.2, 5.3 Hz, 1H), 2.71 (dd,  $J$  = 15.5,

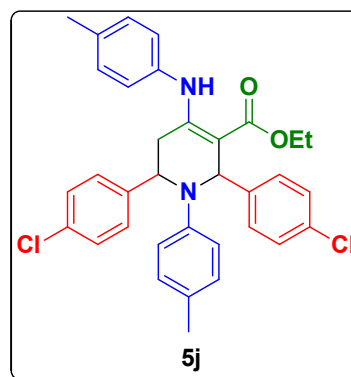

3.1 Hz, 1H), 2.28 (s, 3H), 2.17 (s, 3H), 1.42 (d,  $J$  = 7.4 Hz, 3H) ppm.  $^{13}\text{C}$  NMR (100 MHz,  $\text{CDCl}_3$ )  $\delta$  168.1, 156.2, 144.4, 142.9, 141.3, 135.9, 135.1, 132.8, 132.1, 129.7, 128.9, 128.8, 128.7, 128.5, 128.4, 128.2, 128.1, 127.9, 125.9, 125.8, 124.2, 113.1, 97.3, 59.8, 57.4, 54.9, 33.7, 31.0, 21.0, 20.4, 14.9 ppm.

**Ethyl-4-(4-ethylphenylamino)-2,6-bis(4-chlorophenyl)-1-(4-ethylphenyl)-1,2,5,6-tetrahydropyridine-3-carboxylate, 5k**

White Solid. Melting Point: 204-206 °C IR (KBr):  $\nu_{\max}$  = 3222, 3027, 3005, 2974, 2926, 2863, 1647, 1602, 1574, 1514, 1254, 1091, 1012, 813  $\text{cm}^{-1}$ .  $^1\text{H}$  NMR (400 MHz,  $\text{CDCl}_3$ )  $\delta$  10.22 (s, 1H), 7.26-7.23 (m, 6H), 7.06 (s, 2H), 6.97 (d,  $J$  = 7.9 Hz, 2H), 6.92 (d,  $J$  = 8.3 Hz, 2H), 6.38 (d,  $J$  = 8.4 Hz, 2H), 6.32 (d,  $J$  = 5.4 Hz, 2H), 6.29 (s, 1H), 5.06 (s, 1H), 4.48 – 4.38 (m, 1H), 4.36 – 4.26 (m, 1H), 2.79 (dd,  $J$  = 15.2, 5.2 Hz, 1H), 2.73 (d,  $J$  = 14.8 Hz, 1H), 2.58 (q,  $J$  = 7.5 Hz, 2H), 2.48

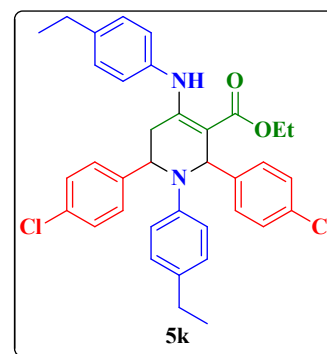

(q,  $J$  = 7.5 Hz, 2H), 1.44 (t,  $J$  = 7.1 Hz, 3H), 1.19 (t,  $J$  = 7.6 Hz, 3H), 1.13 (t,  $J$  = 7.5 Hz, 3H) ppm.

$^{13}\text{C}$  NMR (101 MHz,  $\text{CDCl}_3$ )  $\delta$  169.2, 157.4, 145.8, 144.0, 143.4, 142.5, 136.4, 133.9, 133.4, 129.9, 129.5, 129.3, 129.1, 127.1, 114.2, 98.5, 60.9, 58.6, 56.0, 34.8, 29.5, 28.8, 16.9, 16.7, 16.0 ppm.

**Ethyl-4-(4-chlorophenylamino)-1-(4-chlorophenyl)-1,2,5,6-tetrahydro-2,6-bis(3,4,5-trimethoxyphenyl)pyridine-3-carboxylate, 5l**

White Solid. Melting Point: 162-164  $^\circ\text{C}$ . IR (KBr):  $\nu_{\text{max}}$  = 3217, 3067, 2984, 2837, 1724, 1610, 1541, 1516, 1261, 1061, 1035, 950, 892, 814  $\text{cm}^{-1}$ .  $^1\text{H}$  NMR (400 MHz,  $\text{CDCl}_3$ )  $\delta$  10.24 (s, 1H), 7.11 (d,  $J$  = 8.1 Hz, 2H), 7.04 (d,  $J$  = 8.5 Hz, 2H), 6.53 – 6.43 (m, 4H), 6.34 – 6.24 (m, 5H), 4.98 (s, 1H), 4.52 – 4.40 (m, 1H), 4.34 – 4.23 (m, 1H), 3.84 (s, 3H), 3.83 (s, 3H), 3.74 (s, 6H), 3.70 (s, 6H), 2.93 (dd,  $J$  = 15.0, 5.5 Hz, 1H), 2.68 (d,  $J$  = 14.9 Hz, 1H), 1.43 (t,  $J$  =

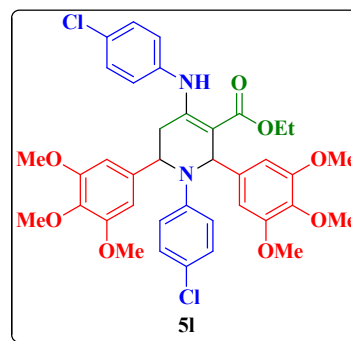

7.1 Hz, 3H) ppm.  $^{13}\text{C}$  NMR (100 MHz,  $\text{CDCl}_3$ )  $\delta$  168.0, 156.2, 153.6, 153.2, 145.5, 139.0, 137.9, 136.7, 136.4, 129.0, 128.8, 127.5, 121.6, 114.1, 103.8, 103.0, 98.1, 61.0, 60.9, 59.8, 58.5, 56.1, 56.0, 55.7, 33.7, 15.1 ppm.

**Ethyl-4-(3-bromophenylamino)-1-(3-bromophenyl)-2,6-bis(4-bromophenyl)-1,2,5,6-tetrahydropyridine-3-carboxylate, 5m**

White Solid. Melting Point: 179-181  $^\circ\text{C}$ . IR (KBr):  $\nu_{\text{max}}$  = 3241, 3055, 2980, 2926, 1660, 1613, 1586, 1256, 1097, 1028, 821  $\text{cm}^{-1}$ .  $^1\text{H}$  NMR (400 MHz,  $\text{CDCl}_3$ )  $\delta$  10.27 (s, 1H), 7.41 (dd,  $J$  = 13.4, 8.3 Hz, 4H), 7.25 (s, 1H), 7.13 (d,  $J$  = 8.2 Hz, 2H), 7.03 (t,  $J$  = 7.9 Hz, 1H), 6.98 (d,  $J$  = 8.2 Hz, 2H), 6.91 (t,  $J$  = 8.1 Hz, 1H), 6.76 (d,  $J$  = 7.7 Hz, 1H), 6.58 (s, 1H), 6.44 – 6.32 (m, 3H), 6.26 (s, 1H), 5.05 (s, 1H), 4.52 – 4.41 (m, 1H), 4.37 – 4.25 (m, 1H), 2.78 (dd,  $J$  = 15.2,

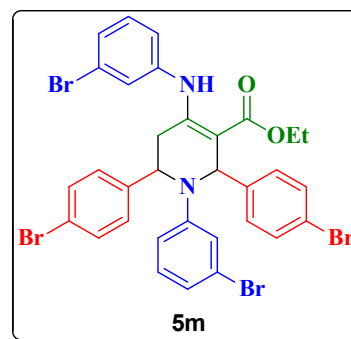

5.4 Hz, 1H), 2.68 (d,  $J$  = 13.9 Hz, 1H), 1.45 (t,  $J$  = 7.1 Hz, 3H) ppm.  $^{13}\text{C}$  NMR (100 MHz,  $\text{CDCl}_3$ )  $\delta$  155.3, 148.1, 142.3, 141.0, 139.3, 132.6, 132.0, 130.7, 130.7, 129.6, 129.0, 128.6, 128.3, 124.7, 123.8, 122.9, 121.9, 121.0, 120.3, 116.0, 112.0, 98.7, 60.6, 57.9, 55.2, 33.8, 15.2 ppm.

**Ethyl-1-(benzo[d][1,3]dioxol-5-yl)-4-(benzo[d][1,3]dioxol-6-ylamino)-1,2,5,6-tetrahydro-2,6-dip-tolylpyridine-3-carboxylate, 5n**

White Solid. Melting Point: 234-236 °C. IR (KBr):  $\nu_{\max}$  = 3247, 3083, 3048, 2879, 1655, 1632, 1592, 1488, 1367, 1255, 1067, 1037, 933, 813, 568  $\text{cm}^{-1}$ .  $^1\text{H}$  NMR (400 MHz,  $\text{CDCl}_3$ )  $\delta$  10.08 (s, 1H), 7.19 (d,  $J$  = 8.0 Hz, 2H), 7.08 (t, 4H), 7.04 (d,  $J$  = 8.0 Hz, 2H), 6.52 (dd,  $J$  = 15.2, 8.4 Hz, 2H), 6.26 (s, 1H), 6.18 (d,  $J$  = 2.4 Hz, 1H), 5.95 – 5.87 (m, 3H), 5.81 – 5.73 (m, 3H), 5.69 (d,  $J$  = 2.0 Hz, 1H), 5.01 (s, 1H), 4.49 – 4.37 (m, 1H), 4.34 – 4.24 (m, 1H), 2.80 (dd,  $J$  = 15.1, 5.7 Hz, 1H), 2.64 (dd,  $J$  = 15.1, 2.5 Hz, 1H), 2.34 (s, 3H), 2.32 (s, 3H), 1.45 (t,  $J$  = 7.1 Hz,

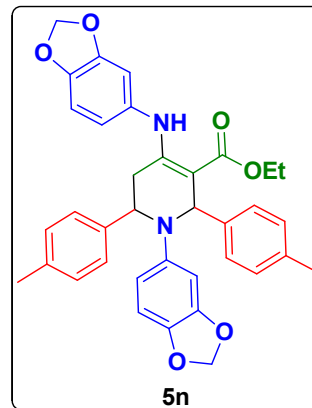

3H) ppm.  $^{13}\text{C}$  NMR (100 MHz,  $\text{CDCl}_3$ )  $\delta$  168.3, 156.7, 148.1, 147.7, 145.8, 143.4, 141.1, 140.0, 138.4, 136.8, 135.8, 131.9, 129.4, 128.9, 126.7, 126.4, 119.9, 108.4, 108.1, 107.8, 105.0, 101.5, 100.4, 97.7, 96.1, 59.7, 58.4, 55.8, 33.8, 21.2, 21.1, 14.9 ppm. HRMS (ESI): calcd 591.2417; found 591.2563

**Ethyl-1-(benzo[d][1,3]dioxol-5-yl)-4-(benzo[d][1,3]dioxol-6-ylamino)-1,2,5,6-tetrahydro-2,6-bis(4-methoxyphenyl)pyridine-3-carboxylate, 5o**

White Solid. Melting Point: 183-185 °C. IR (KBr):  $\nu_{\max}$  = 3259, 3170, 3066, 2977, 2903, 1650, 1605, 1592, 1506, 1248, 1064, 1036, 930, 811, 549  $\text{cm}^{-1}$ .  $^1\text{H}$  NMR (400 MHz,  $\text{CDCl}_3$ )  $\delta$  10.10 (s, 1H), 7.19 (d,  $J$  = 8.6 Hz, 2H), 7.06 (d,  $J$  = 8.6 Hz, 2H), 6.82 (dd,  $J$  = 8.6, 7.1 Hz, 4H), 6.53 (dd,  $J$  = 8.4, 5.5 Hz, 2H), 6.20 (s, 1H), 6.17 (d,  $J$  = 2.5 Hz, 1H), 5.91 (dd, 3H), 5.84 (dd,  $J$  = 8.2, 1.9 Hz, 1H), 5.78 – 5.75 (m, 3H), 4.96 (s, 1H), 4.46 – 4.37 (m, 1H), 4.33 – 4.24 (m, 1H), 3.80 (s, 3H), 3.78 (s, 3H), 2.77 (dd,  $J$  = 15.1, 5.5

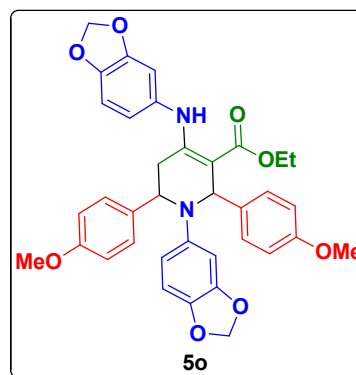

Hz, 1H), 2.63 (dd,  $J$  = 15.1, 2.7 Hz, 1H), 1.43 (t,  $J$  = 7.1 Hz, 3H) ppm.  $^{13}\text{C}$  NMR (101 MHz,



CDCl<sub>3</sub>)  $\delta$  168.0, 158.5, 157.8, 156.5, 147.8, 145.6, 138.2, 135.7, 131.7, 127.5, 127.2, 119.6, 113.8, 113.3, 108.0, 107.7, 107.6, 105.0, 101.2, 100.2, 97.4, 96.0, 59.3, 57.6, 55.3, 55.1, 55.0, 33.6, 14.6 ppm. HRMS (ESI): calcd 622.2315; found 622.2327

**Ethyl-1-(benzo[d][1,3]dioxol-5-yl)-4-(benzo[d][1,3]dioxol-6-ylamino)-2,6-bis(4-chlorophenyl)-1,2,5,6-tetrahydropyridine-3-carboxylate, 5p**

White Solid. Melting Point: 205-207 °C. IR (KBr):  $\nu_{\max}$  = 3255, 3086, 2973, 2877, 1649, 1594, 1487, 1243, 1093, 932, 818 cm<sup>-1</sup>.

<sup>1</sup>H NMR (400 MHz, CDCl<sub>3</sub>)  $\delta$  10.09 (s, 1H), 7.25 – 7.18 (m, 5H), 7.06 (d,  $J$  = 8.4 Hz, 2H), 6.61 – 6.50 (m, 2H), 6.18 (s, 1H), 6.09 ( $J$  = 2.5 Hz, 1H), 5.93 (dd,  $J$  = 5.6, 1.2 Hz, 2H), 5.87 (s, 2H), 5.86 5.83 (m, 1H), 5.82 (d,  $J$  = 2.5 Hz, 1H), 5.78 (dd,  $J$  = 5.7, 1.3 Hz, 2H), 4.96 (s, 1H), 4.46 – 4.3qw5 (m, 1H), 4.33 – 4.23 (m, 1H), 2.74 (dd,  $J$  = 15.3, 5.5 Hz, 1H), 2.64 (dd,  $J$  = 15.3, 3.0 Hz, 1H),

1.41 (t,  $J$  = 7.1 Hz, 3H) ppm. <sup>13</sup>C NMR (100 MHz, CDCl<sub>3</sub>)  $\delta$  168.1, 156.4, 148.3, 147.9, 142.7, 142.4, 141.2, 139.1, 133.0, 132.2, 131.6, 128.9, 128.4, 128.2, 127.9, 119.8, 108.5, 108.0, 107.9, 105.6, 101.6, 100.7, 97.1, 96.5, 59.9, 57.8, 55.9, 33.8, 14.8 ppm. HRMS (ESI): calcd 630.1324; found 630.1306.

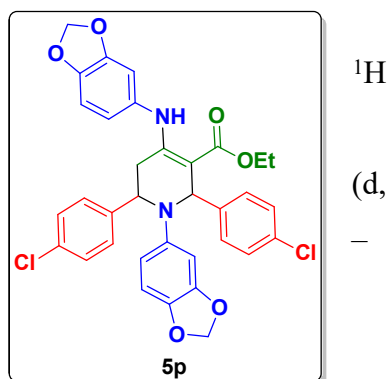

**Ethyl-4-(4-methoxyphenylamino)-1,2,5,6-tetrahydro-1-(4-methoxyphenyl)-2,6-dip-tolylpyridine-3-carboxylate, 5q**

White Solid. Melting Point: 222-224 °C. IR (KBr):  $\nu_{\max}$  = 3247, 3047, 2981, 2835, 1652, 1606, 1511, 1244, 1069, 810 cm<sup>-1</sup>.

<sup>1</sup>H NMR (400 MHz, CDCl<sub>3</sub>)  $\delta$  10.13 (s, 1H), 7.19 (d,  $J$  = 7.2 Hz, 2H), 7.07 (d,  $J$  = 8.7 Hz, 6H), 6.63 (dd,  $J$  = 20.0, 8.2 Hz, 4H), 6.44 (d,  $J$  = 8.2 Hz, 2H), 6.29 (s, 1H), 6.21 (d,  $J$  = 7.9 Hz, 2H), 5.01 (s, 1H), 4.48 – 4.36 (m, 1H), 4.34 – 4.25 (m, 1H), 3.75 (s, 3H), 3.66 (s, 3H), 2.77 (dd,  $J$  = 14.8, 4.6 Hz, 1H), 2.63 (d,  $J$  = 14.9 Hz, 1H), 2.34 (s, 3H), 2.32 (s, 3H), 1.43 (t,  $J$  = 6.6 Hz, 3H)

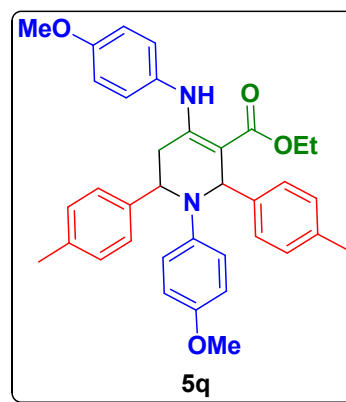

ppm.  $^{13}\text{C}$  NMR (100 MHz,  $\text{CDCl}_3$ )  $\delta$  168.3, 156.8, 141.7, 141.4, 140.2, 136.5, 135.6, 130.8, 129.2, 128.8, 127.8, 126.7, 126.4, 114.4, 114.0, 113.8, 97.3, 59.4, 57.9, 55.6, 55.4, 55.3, 33.6, 21.1, 21.0, 14.8 ppm.

**Ethyl-4-(4-ethylphenylamino)-1-(4-ethylphenyl)-1,2,5,6-tetrahydro-2,6-bis(2,3-dimethoxyphenyl)pyridine-3-carboxylate, 5r**

White Solid. Melting Point: 162-164 °C. IR (KBr):  $\nu_{\text{max}}$  = 3252, 2987, 2831, 1653, 1613, 1590, 1514, 1253, 1061, 1030, 942, 806  $\text{cm}^{-1}$ .  $^1\text{H}$  NMR (400 MHz,  $\text{CDCl}_3$ )  $\delta$  9.73 (s, 1H), 6.92 – 6.81 (m, 5H), 6.77 (s, 1H), 6.74 (s, 2H), 6.69 (dd,  $J$  = 8.7, 2.6 Hz, 1H), 6.64 – 6.60 (m, 1H), 6.40 (s, 1H), 6.35 (d,  $J$  = 8.4 Hz, 2H), 6.20 (d,  $J$  = 8.0 Hz, 2H), 5.39 (s, 1H), 4.37 – 4.22 (m, 2H), 3.78 (s, 3H), 3.64 (s, 3H), 3.61 (s, 3H), 3.56 (s, 3H), 2.91 – 2.82 (m, 2H), 2.54 (q,  $J$

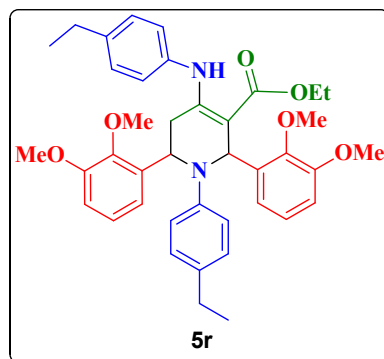

= 7.5 Hz, 2H), 2.45 (q,  $J$  = 7.4 Hz, 2H), 1.39 (t,  $J$  = 7.1 Hz, 3H), 1.16 (t,  $J$  = 7.6 Hz, 3H), 1.11 (t,  $J$  = 7.6 Hz, 3H) ppm.  $^{13}\text{C}$  NMR (100 MHz,  $\text{CDCl}_3$ )  $\delta$  168.9, 153.7, 153.0, 151.8, 150.3, 144.9, 141.4, 136.2, 132.8, 131.4, 131.3, 128.1, 128.0, 126.2, 116.0, 113.7, 113.4, 112.8, 112.0, 110.8, 110.4, 97.4, 59.5, 56.0, 55.6, 55.3, 53.2, 29.7, 28.4, 27.7, 15.8, 14.9 ppm. HRMS (ESI): calcd 651.3434; found 651.3427

**Ethyl-4-(4-ethylphenylamino)-2,6-bis(3-bromophenyl)-1-(4-ethylphenyl)-1,2,5,6-tetrahydropyridine-3-carboxylate, 5s**

White Solid. Melting Point: 166-168 °C. IR (KBr):  $\nu_{\text{max}}$  = 3233, 2963, 2928, 2871, 1651, 1595, 1514, 1253, 1091, 1026, 894, 776, 697  $\text{cm}^{-1}$ .  $^1\text{H}$  NMR (400 MHz,  $\text{CDCl}_3$ )  $\delta$  10.20 (s, 1H), 7.55 (s, 1H), 7.39 (d,  $J$  = 7.6 Hz, 1H), 7.34 (d,  $J$  = 7.5 Hz, 1H), 7.25 (s, 1H), 7.21 – 7.05 (m, 4H), 7.00 (d,  $J$  = 7.9 Hz, 2H), 6.92 (d,  $J$  = 8.3 Hz, 2H), 6.39 (d,  $J$  = 8.4 Hz, 2H), 6.33 (s, 1H), 6.25 (d,  $J$  = 8.0 Hz, 2H), 5.07 (s, 1H), 4.53 – 4.42 (m, 1H), 4.37 – 4.26 (m, 1H), 2.79 (dd,  $J$  = 15.1, 5.3 Hz, 1H), 2.71

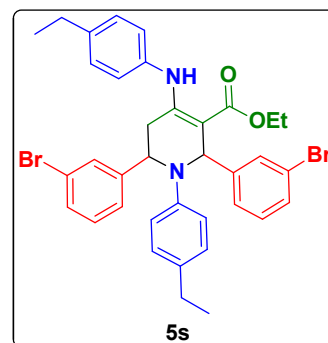

(d,  $J$  = 15.3 Hz, 1H), 2.59 (q,  $J$  = 7.5 Hz, 2H), 2.48 (q,  $J$  = 7.4 Hz, 2H), 1.47 (t,  $J$  = 7.0 Hz, 3H), 1.20 (t,  $J$  = 7.6 Hz, 3H), 1.13 (t,  $J$  = 7.5 Hz, 3H) ppm.  $^{13}\text{C}$  NMR (100 MHz,  $\text{CDCl}_3$ )  $\delta$  167.9, 156.2, 145.3, 142.4, 130.2, 130.2, 129.7, 129.7, 129.5, 129.4, 128.4, 128.3, 126.3, 125.3, 125.0, 122.6,

113.0, 96.8, 59.7, 57.5, 55.1, 33.5, 28.3, 27.6, 15.6, 15.4, 14.8 ppm. HRMS (ESI): calcd 686.1144; found 686.1150

**Ethyl-4-(*p*-tolylamino)-1,2,5,6-tetrahydro-2,6-bis(3,4-dimethoxyphenyl)-1-*p*-tolylpyridine-3-carboxylate, 5t**

White Solid. Melting Point: 176-178 °C. IR (KBr):  $\nu_{\max}$  = 3228, 3087, 3062, 2998, 2905, 1711, 1653, 1587, 1514, 1257, 1069, 1027, 920, 864, 630, 578  $\text{cm}^{-1}$ .  $^1\text{H}$  NMR (400 MHz,  $\text{CDCl}_3$ )  $\delta$  10.32 (s, 1H), 7.17 – 7n.04 (m, 5H), 6.97 (s, 1H), 6.76 (d,  $J$  = 8.3 Hz, 4H), 6.63 (d,  $J$  = 7.3 Hz, 2H), 6.54 (d,  $J$  = 7.9 Hz, 2H), 6.42 – 6.32 (m, 3H), 5.06 (s, 1H), 4.56 – 4.38 (m, 1H), 4.35 – 4.21 (m, 1H), 3.86 (s, 3H), 3.84 (s, 3H), 3.81 (s, 3H), 3.72 (s, 3H),

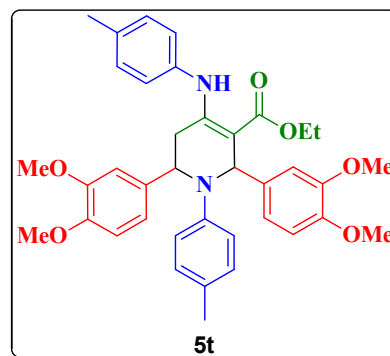

2.93 (dd,  $J$  = 14.8, 4.9 Hz, 1H), 2.78 (d,  $J$  = 14.6 Hz, 1H), 1.45 (t,  $J$  = 6.9 Hz, 3H) ppm.  $^{13}\text{C}$  NMR (101 MHz,  $\text{CDCl}_3$ )  $\delta$  156.5, 149.0, 148.8, 147.9, 147.4, 137.9, 136.3, 135.1, 128.8, 128.8, 125.9, 125.7, 118.6, 118.5, 116.2, 113.0, 111.1, 110.5, 110.1, 109.2, 97.8, 59.5, 57.8, 55.9, 55.8, 55.7, 55.7, 54.9, 33.7, 14.9 ppm.

**VIII.  $^1\text{H}$  &  $^{13}\text{C}$  NMR spectra of the synthesized compounds**

**$^1\text{H}$  NMR spectra of 4a**

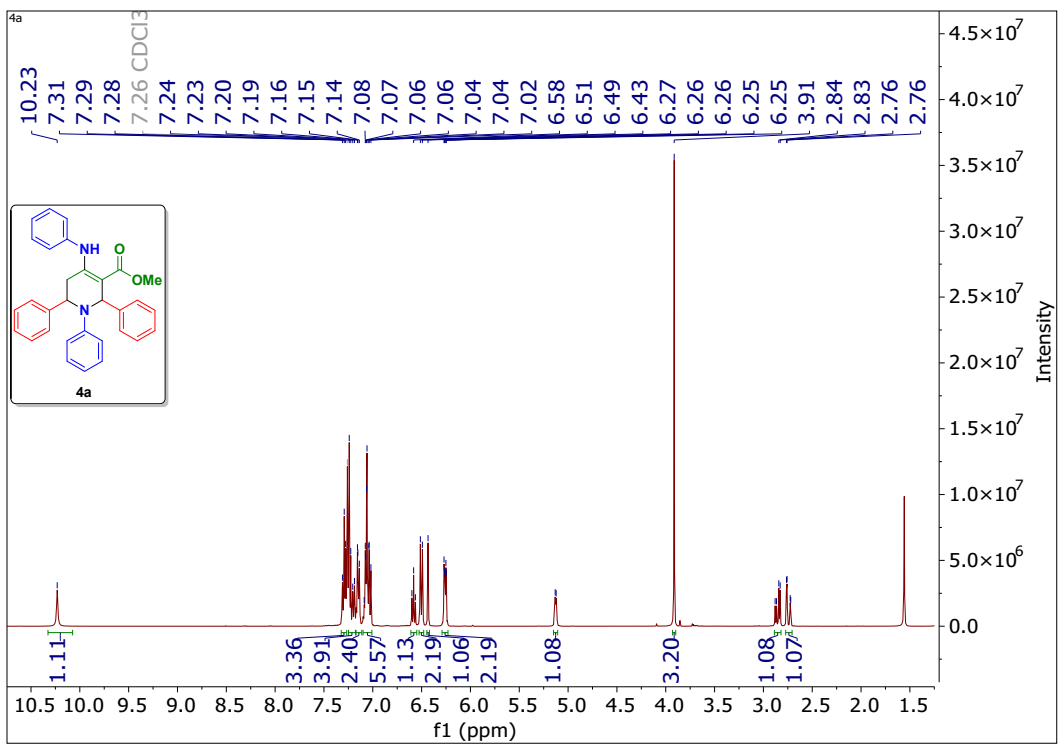

<sup>13</sup>H NMR spectra of 4a

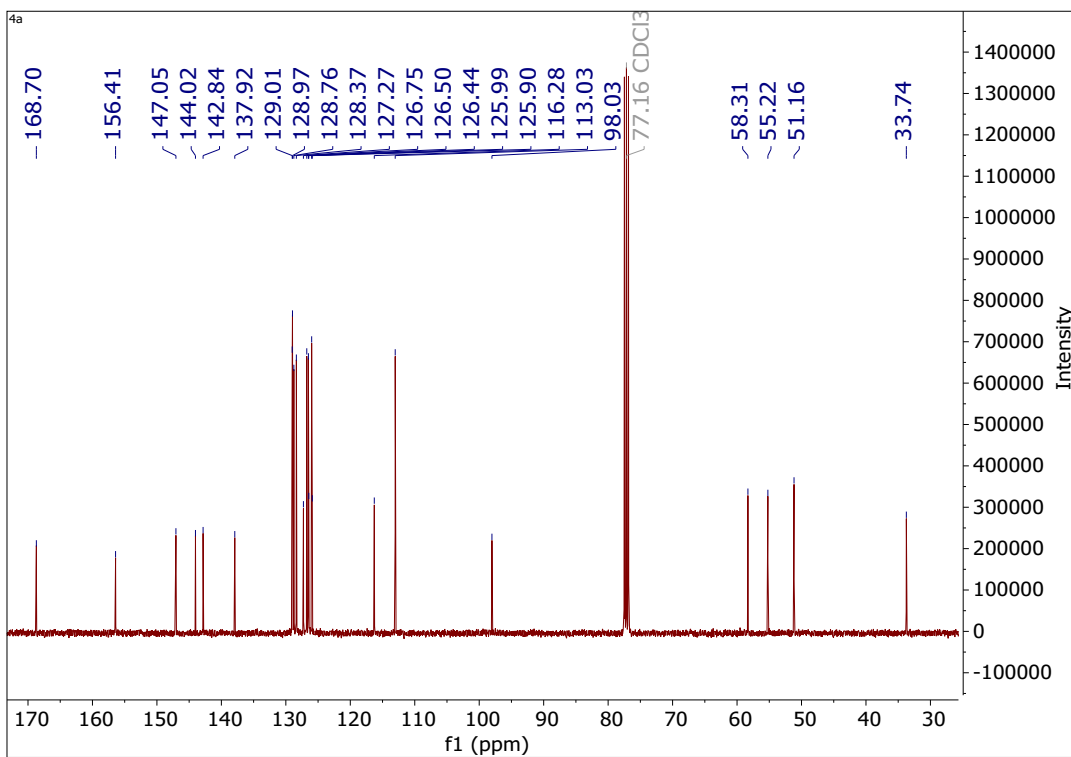

### <sup>1</sup>H NMR Spectrum of 4b

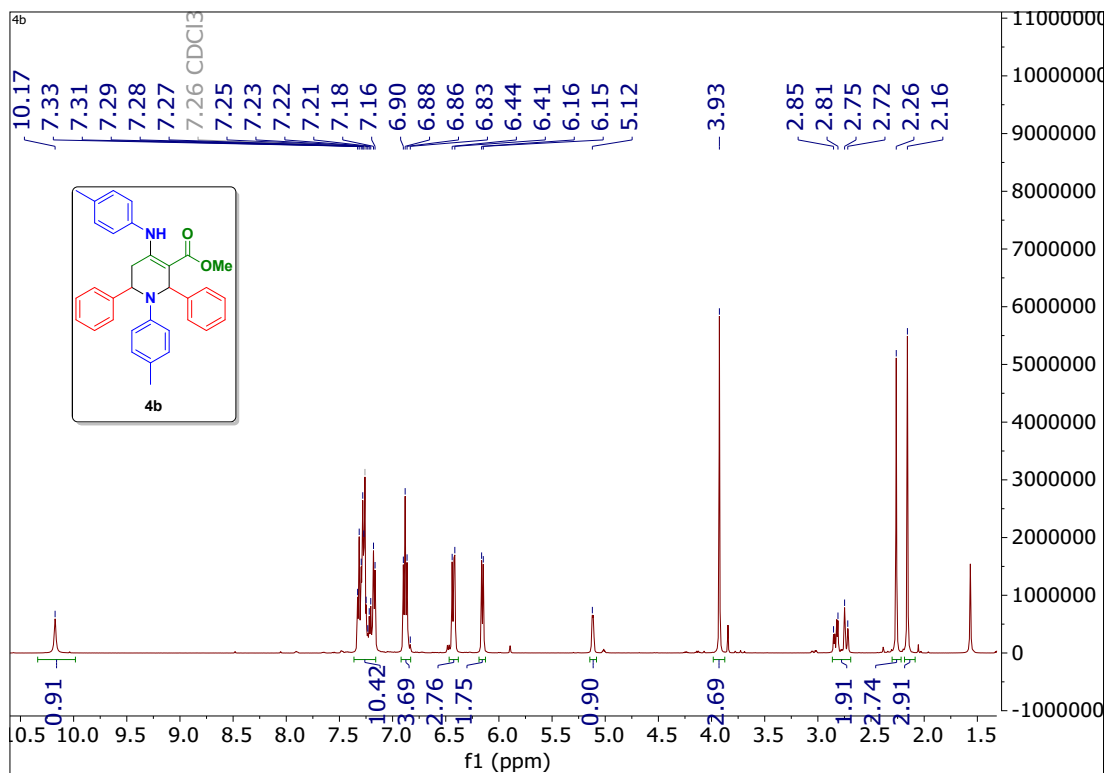

### <sup>13</sup>C NMR Spectrum of 4b

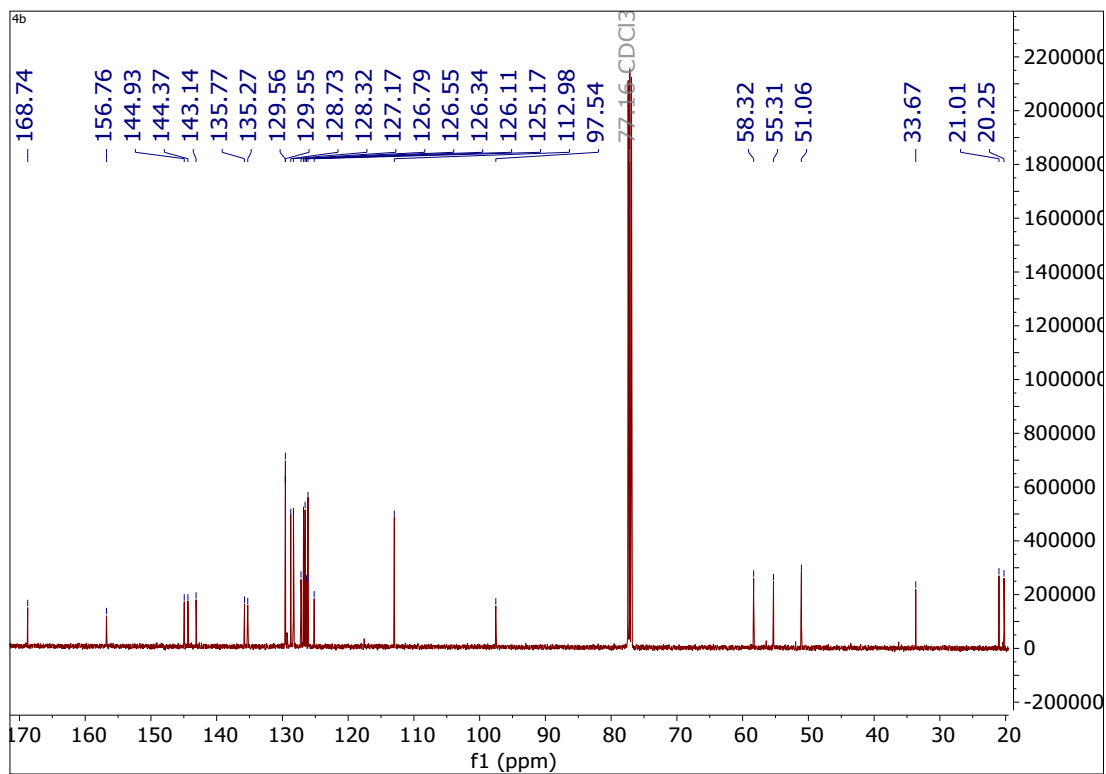

### <sup>1</sup>H NMR spectrum of 4c

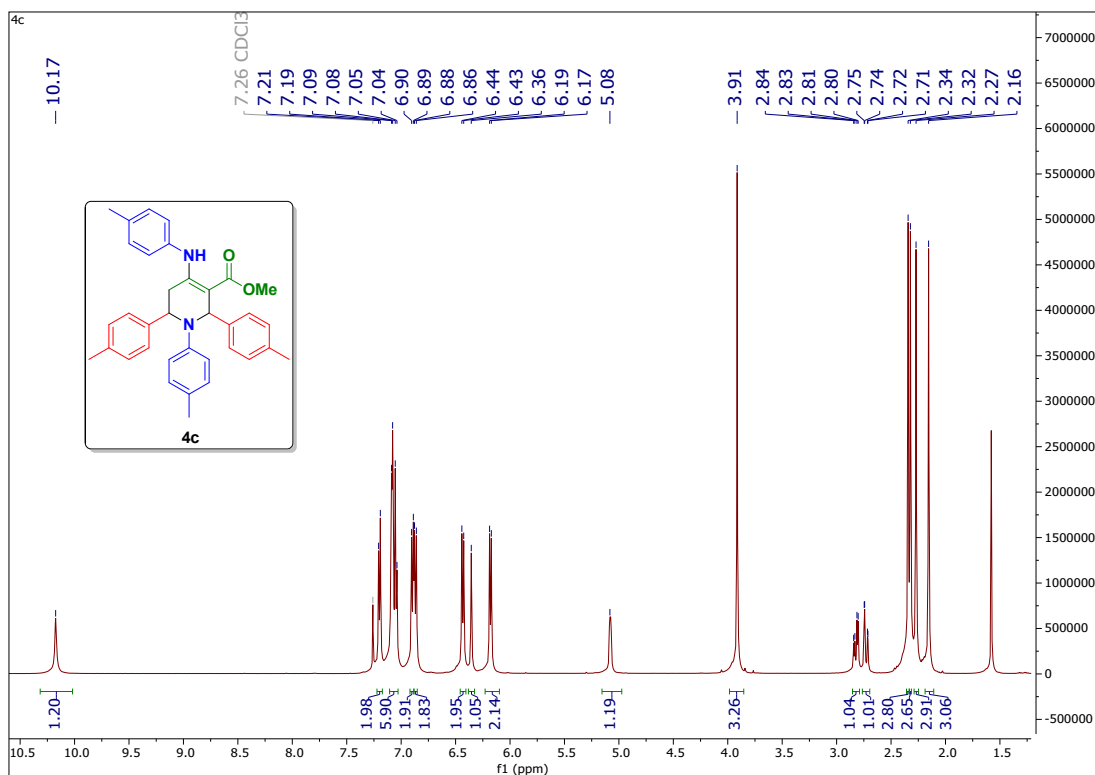

### <sup>13</sup>C NMR spectrum of 4c

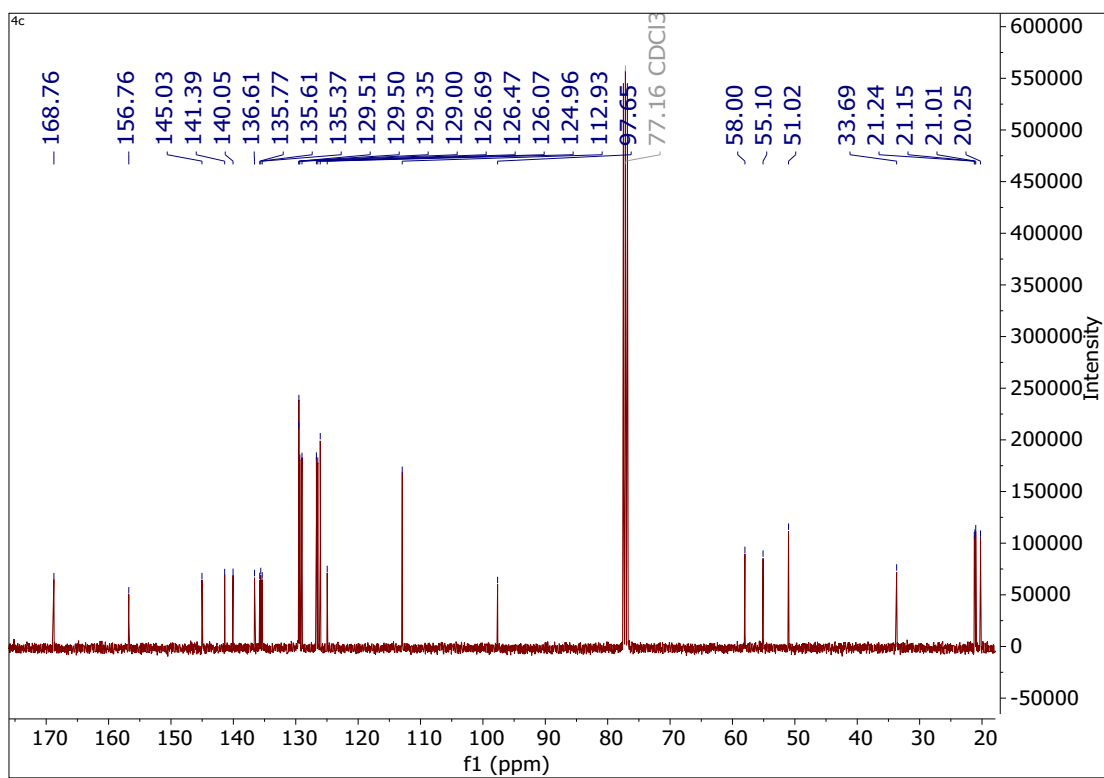

### <sup>1</sup>H NMR spectrum of 4d

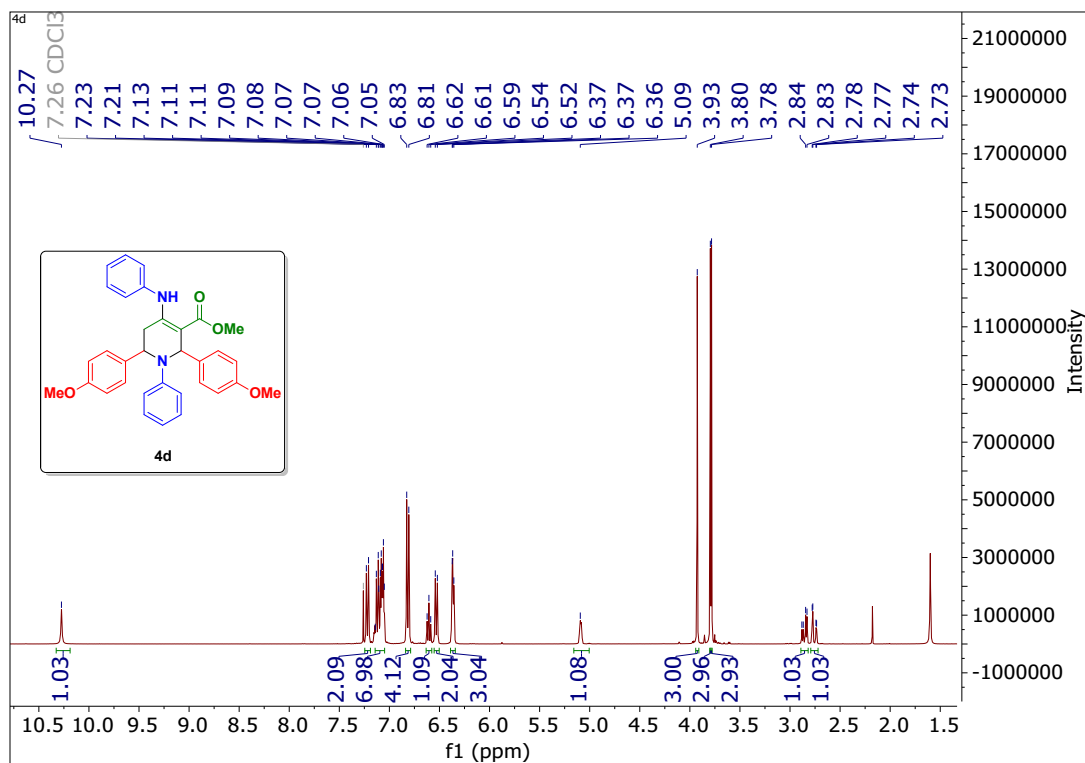

### <sup>13</sup>C NMR spectrum of 4d

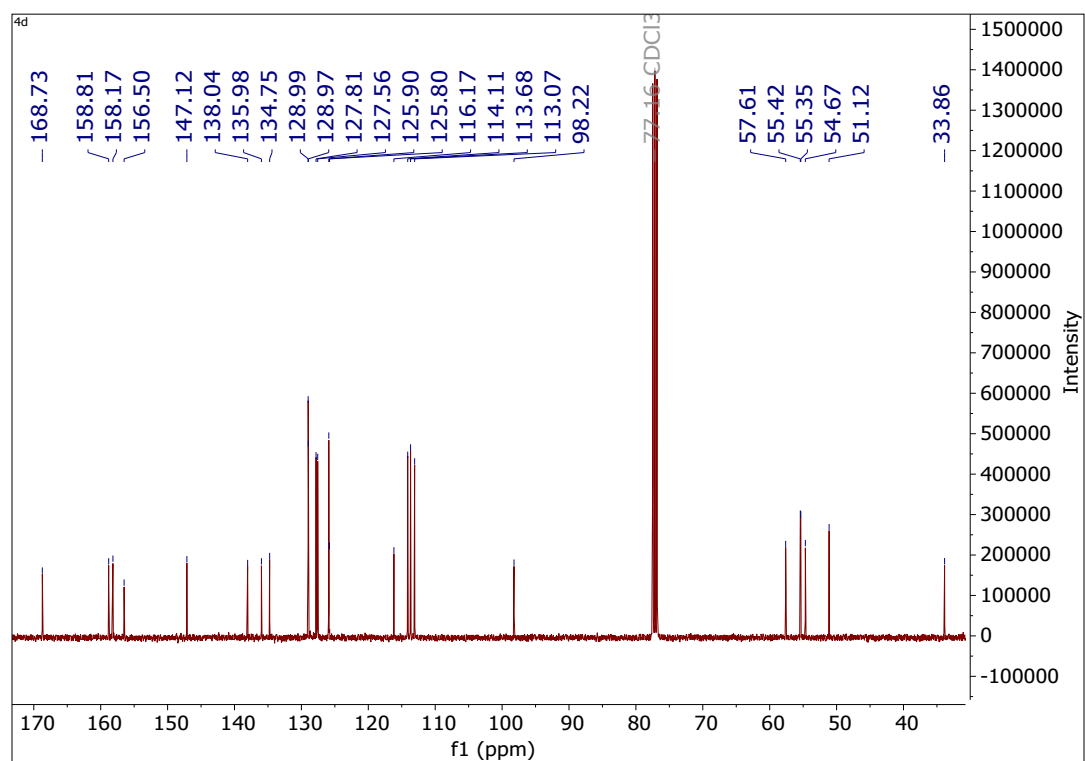

### <sup>1</sup>H NMR spectrum of 4e

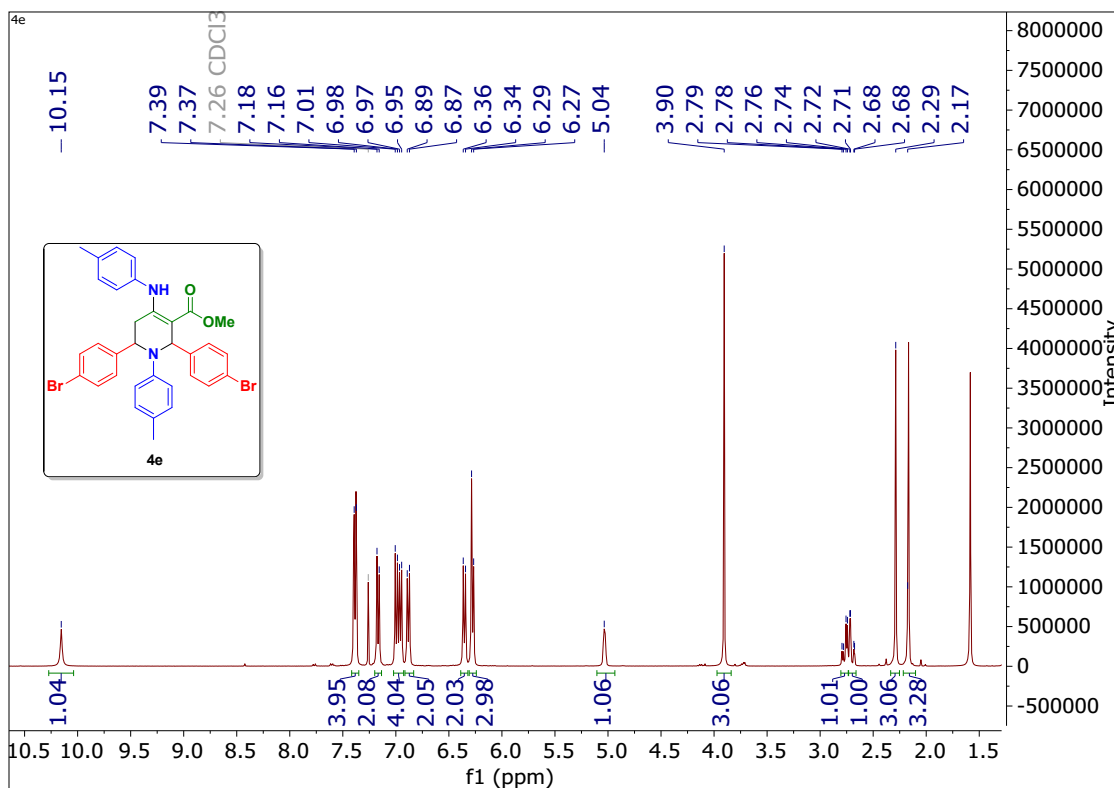

### <sup>13</sup>C NMR spectrum of 4e

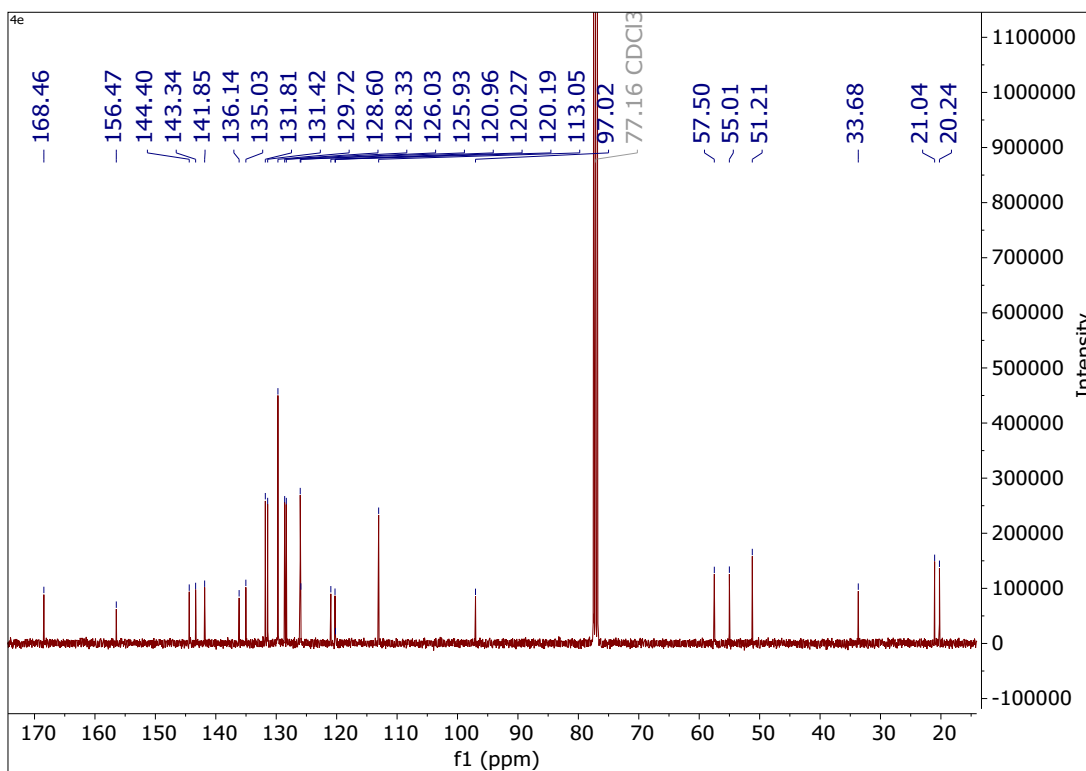



### <sup>1</sup>H NMR spectrum of 4f

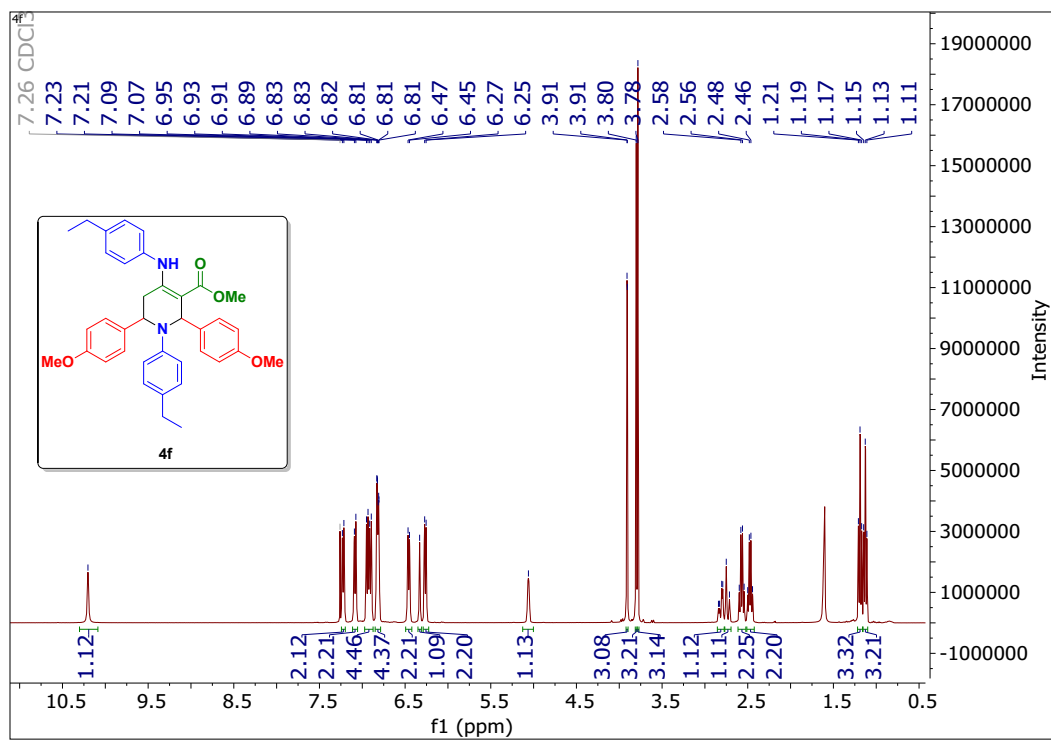

### <sup>13</sup>C NMR Spectrum of 4f

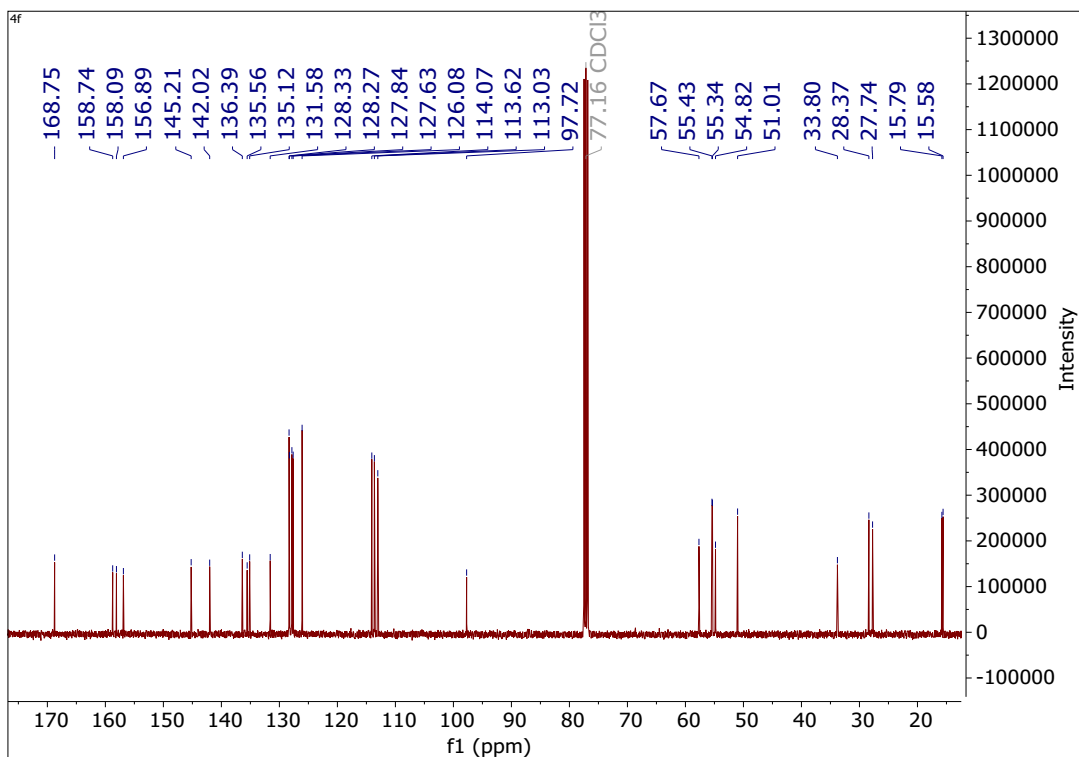

### <sup>1</sup>H NMR Spectrum of 4g

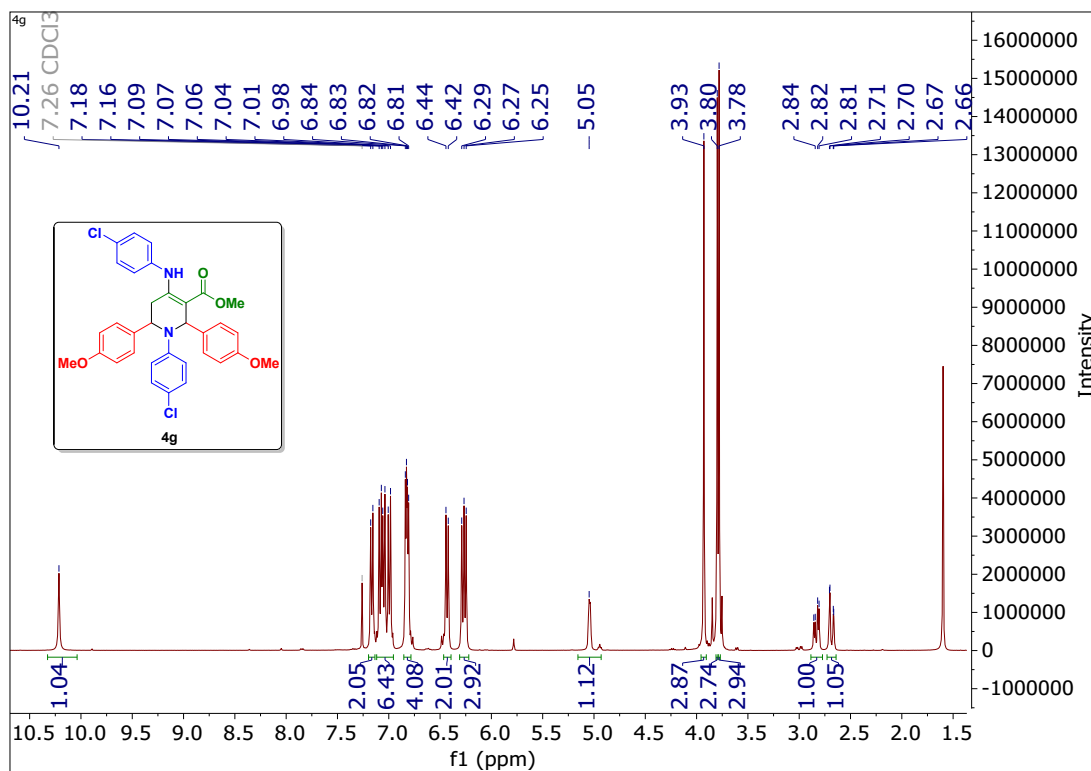

### <sup>13</sup>C NMR Spectrum of 4g

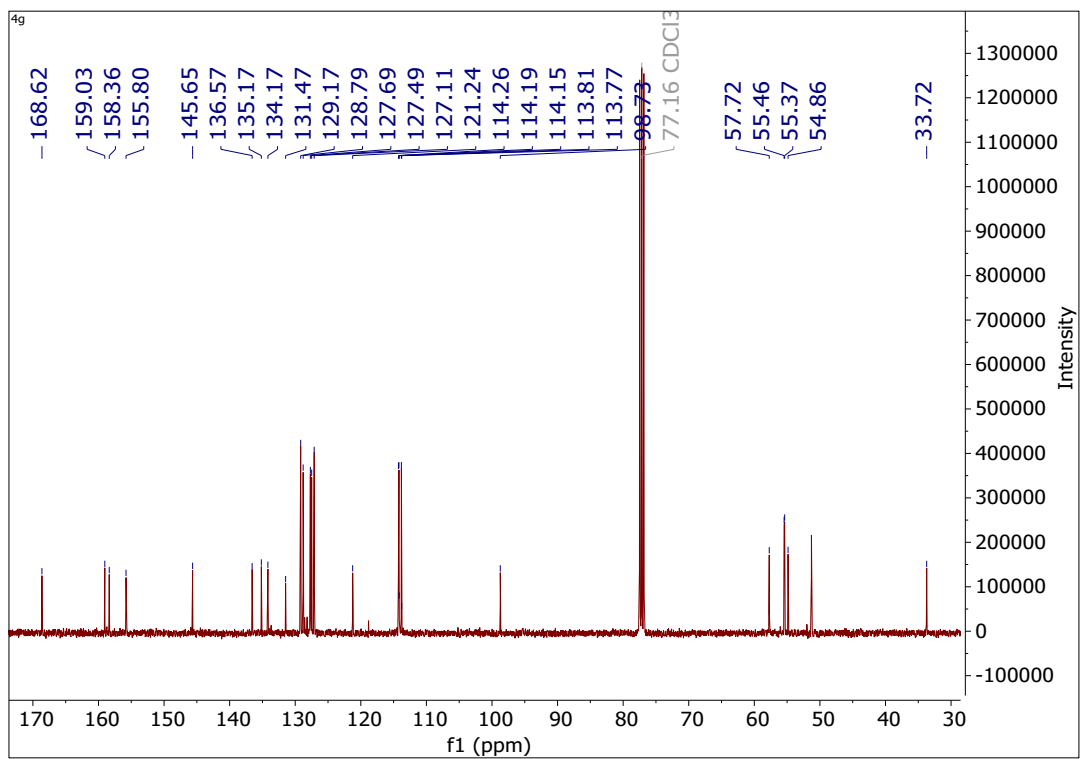

### <sup>1</sup>H NMR spectrum of 4h

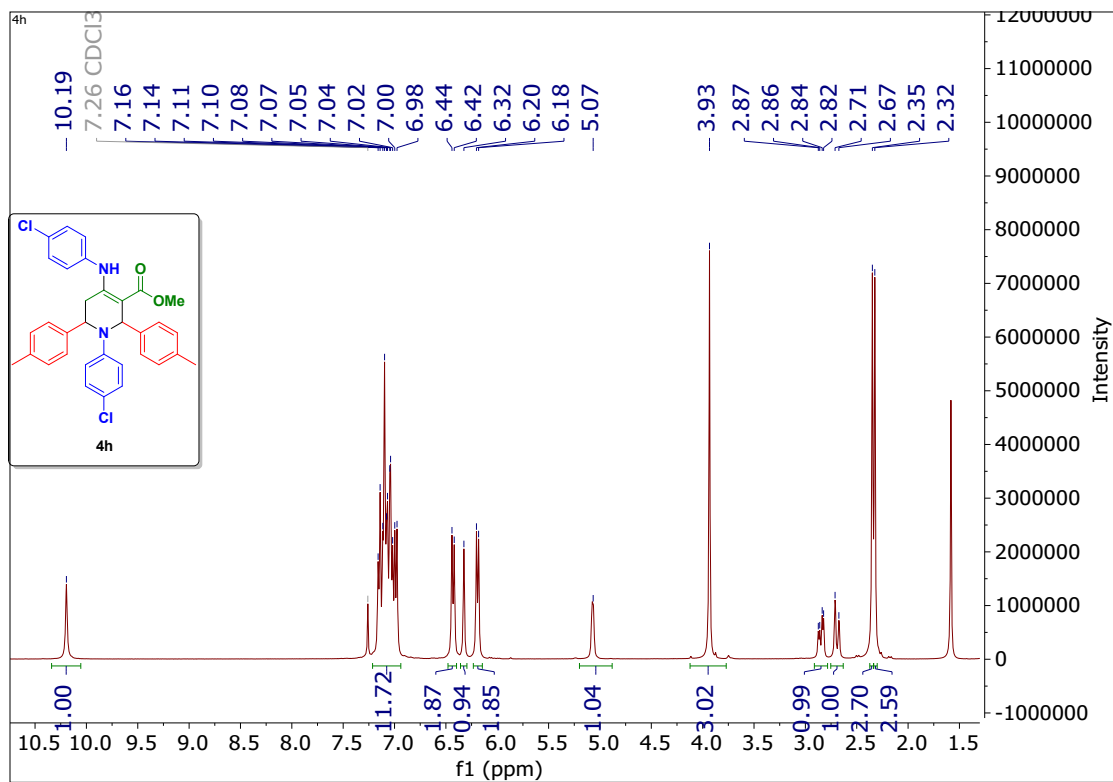

### <sup>13</sup>C NMR spectrum of 4h

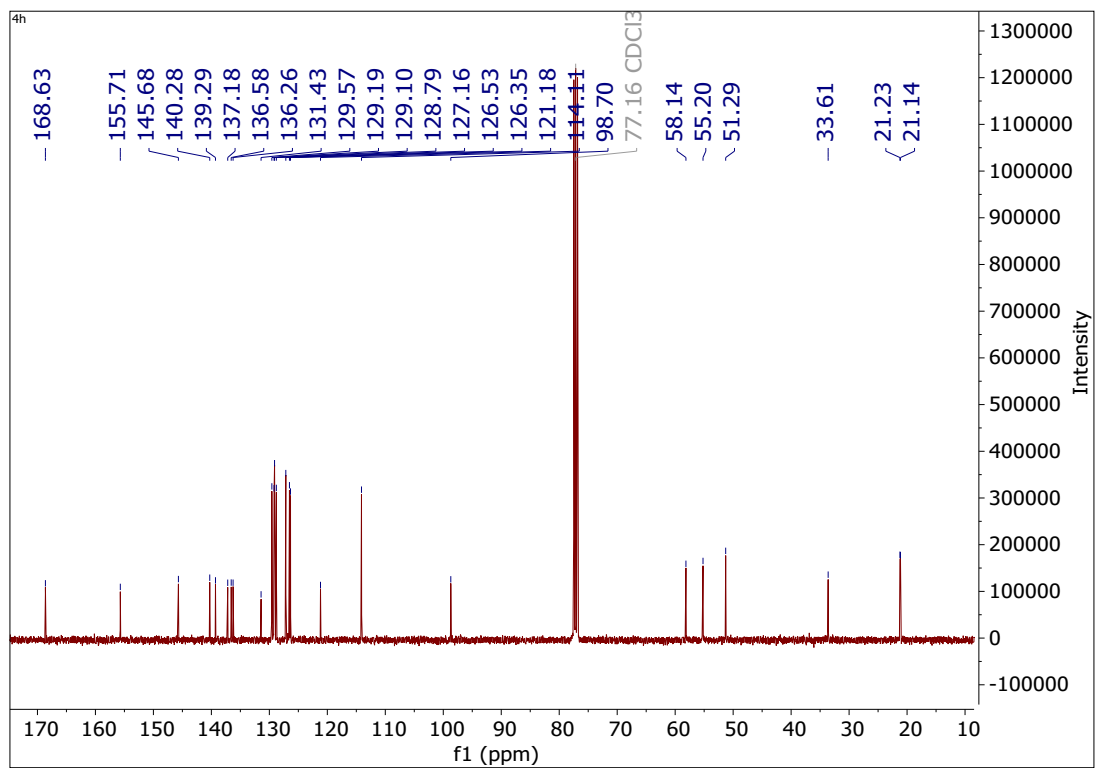

### <sup>1</sup>H NMR Spectrum of 4i

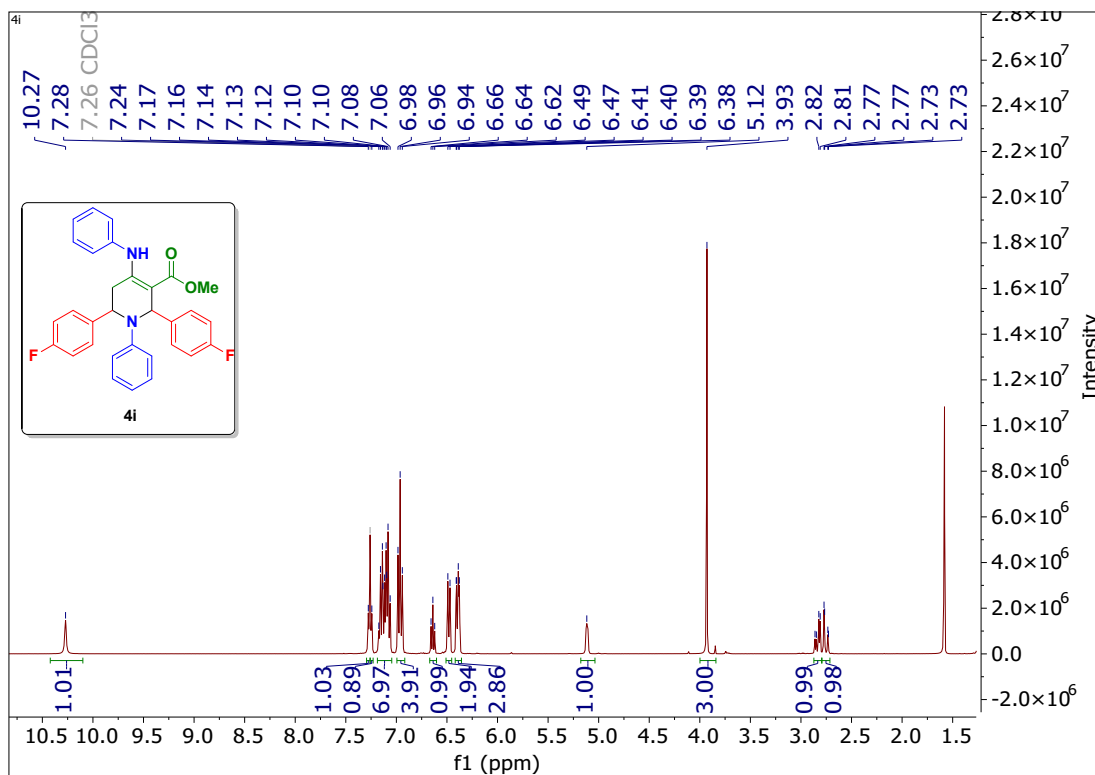

### <sup>13</sup>C NMR spectrum of 4i

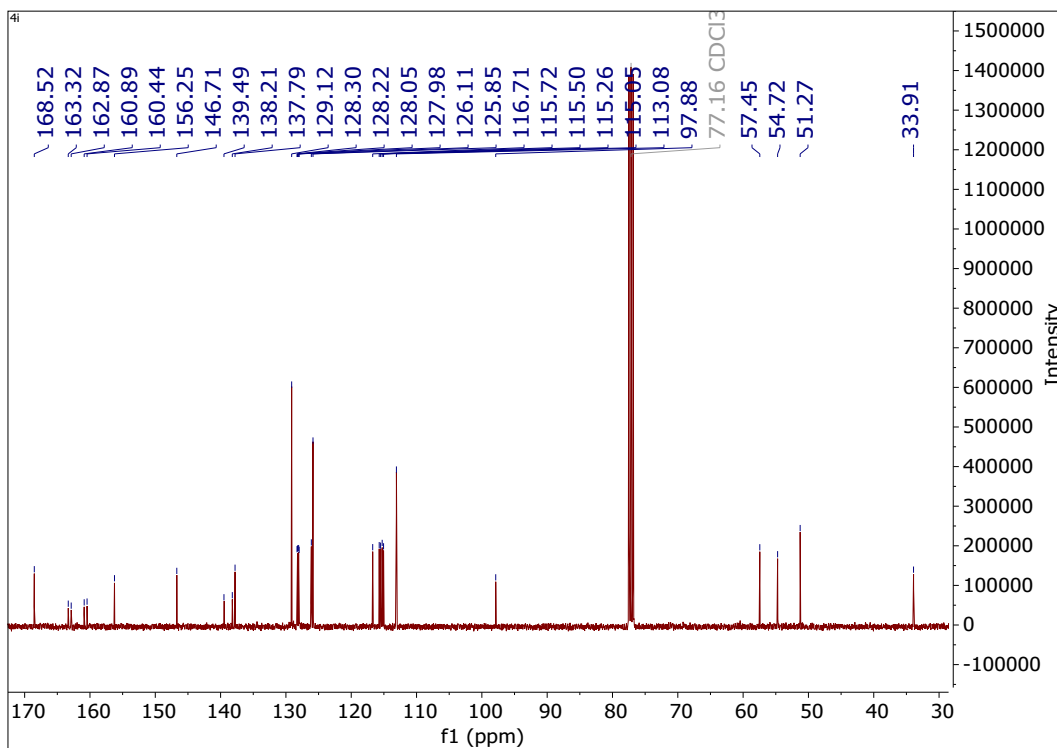

### <sup>1</sup>H NMR Spectrum of 4j

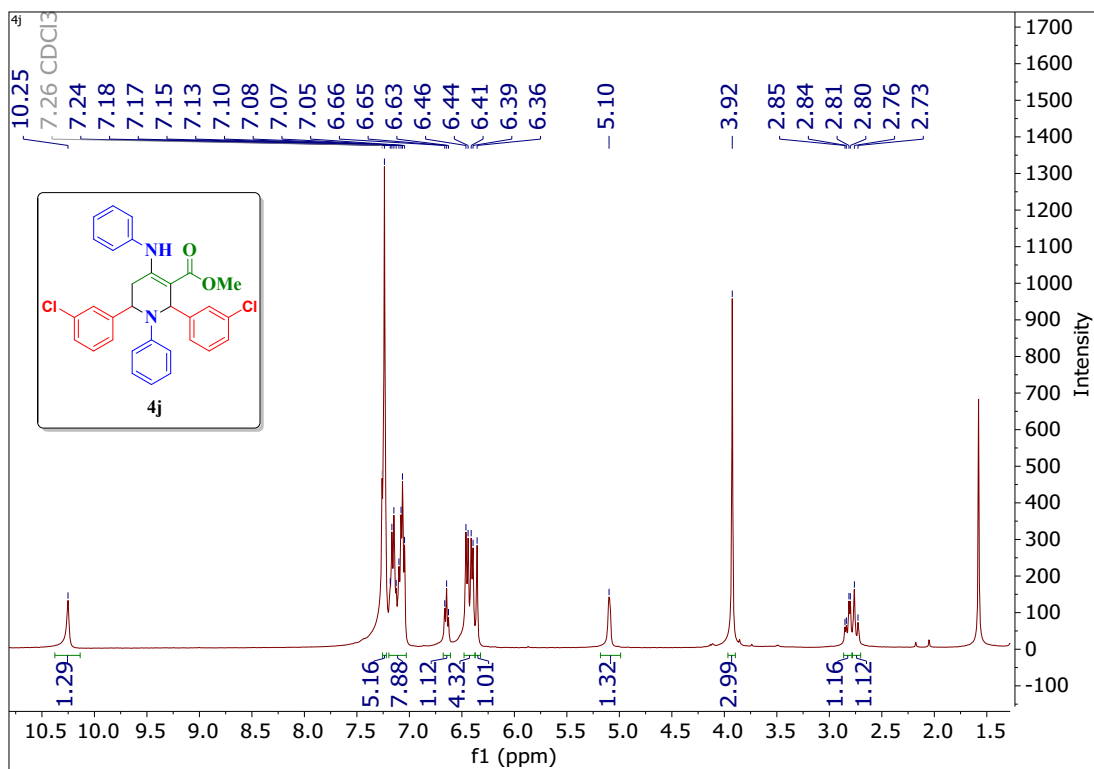

### <sup>13</sup>C NMR spectrum of 4j

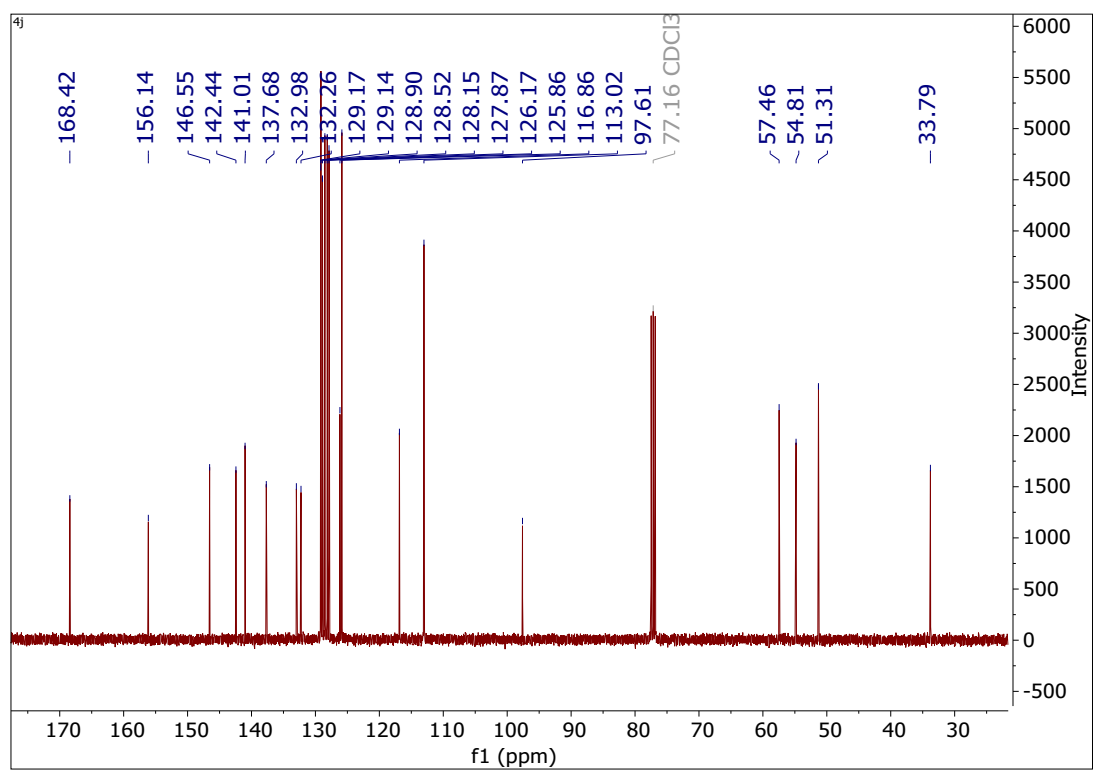

### <sup>1</sup>H NMR Spectrum of 4k

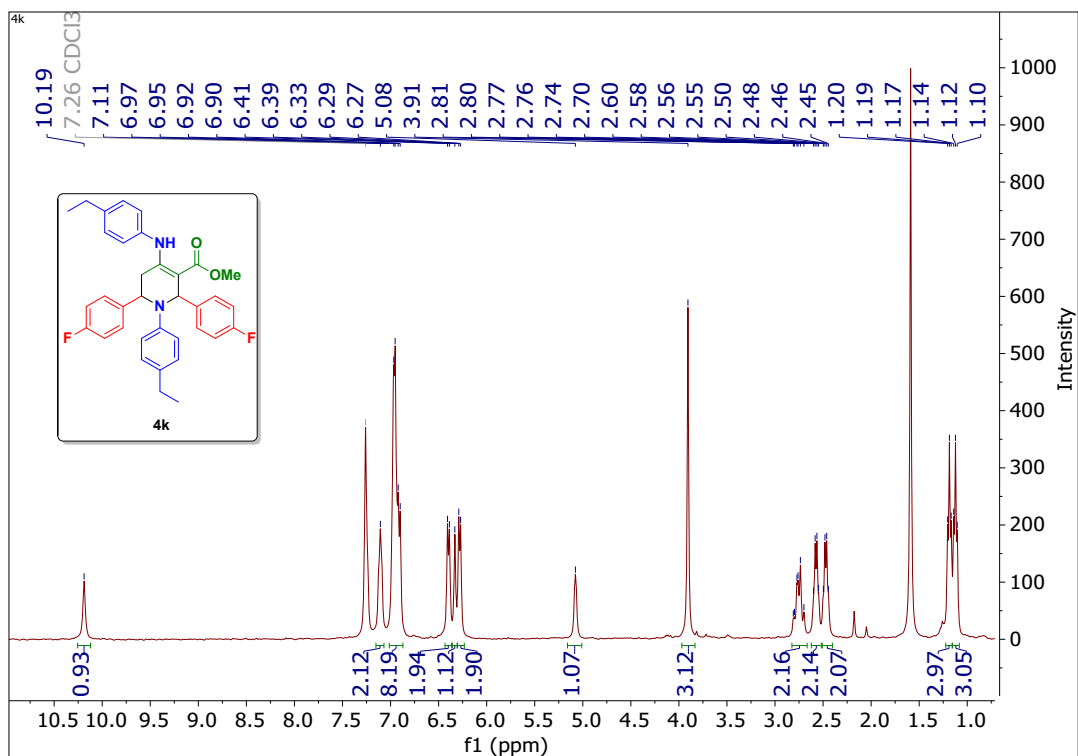

### <sup>13</sup>C NMR spectrum of 4k

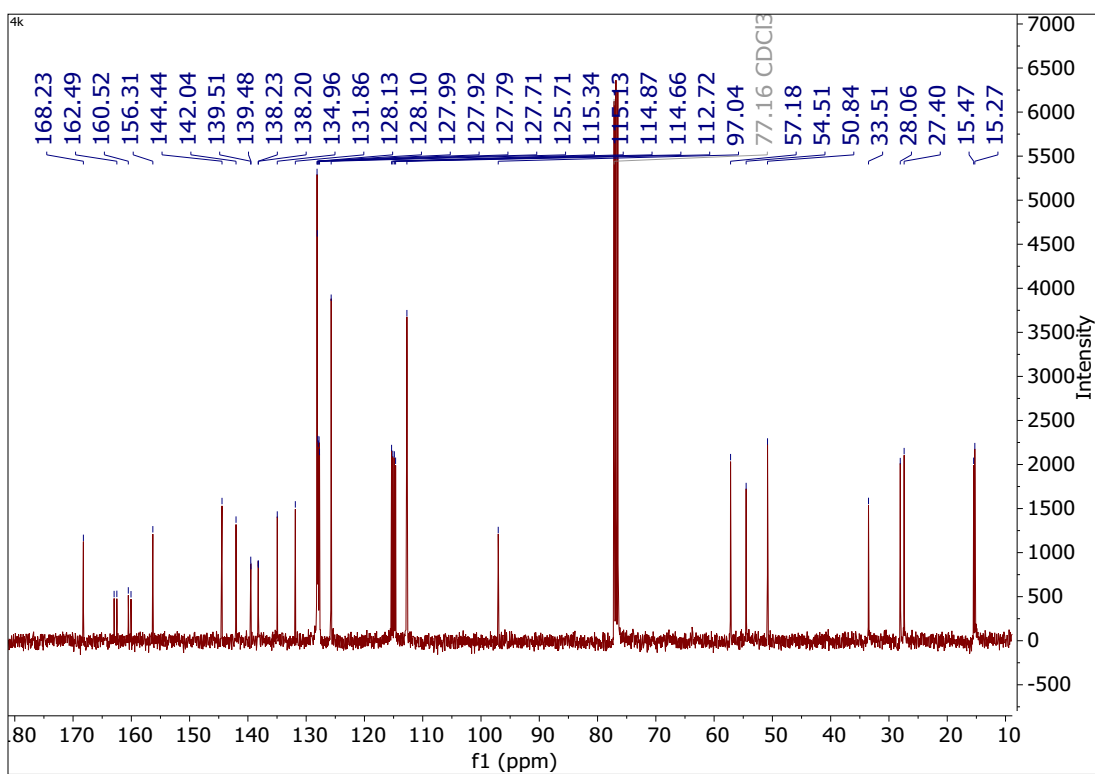

### <sup>1</sup>H NMR spectrum of 4l

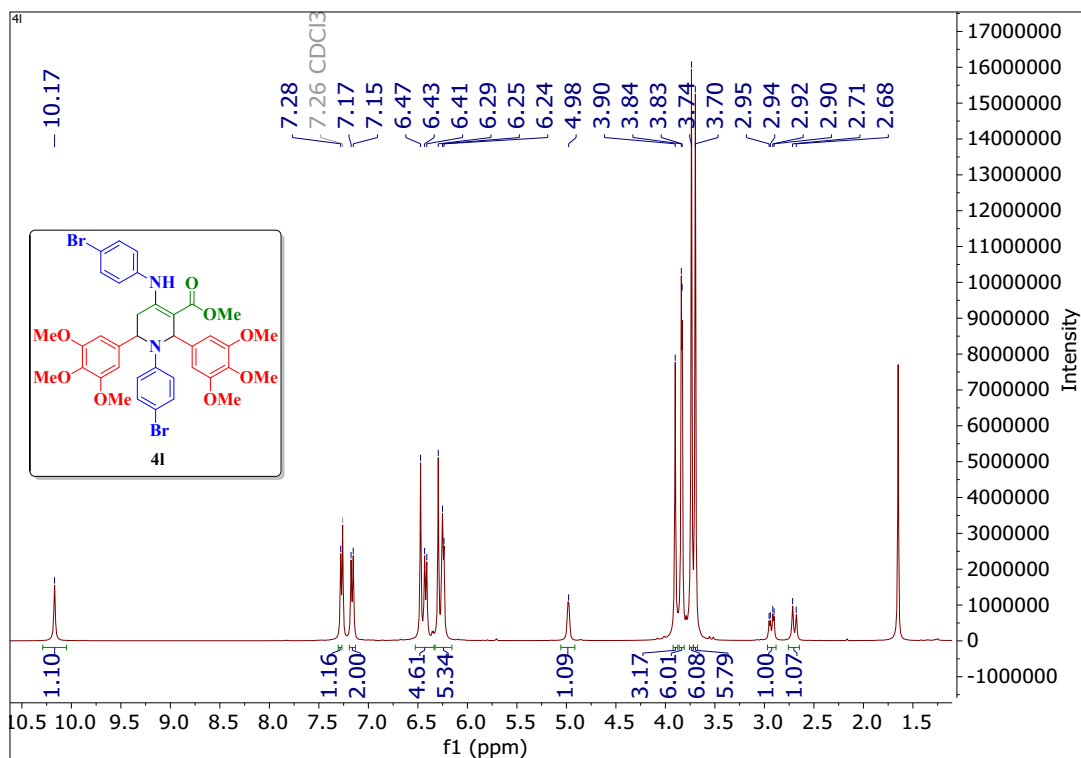

### <sup>13</sup>C NMR Spectrum of 4l

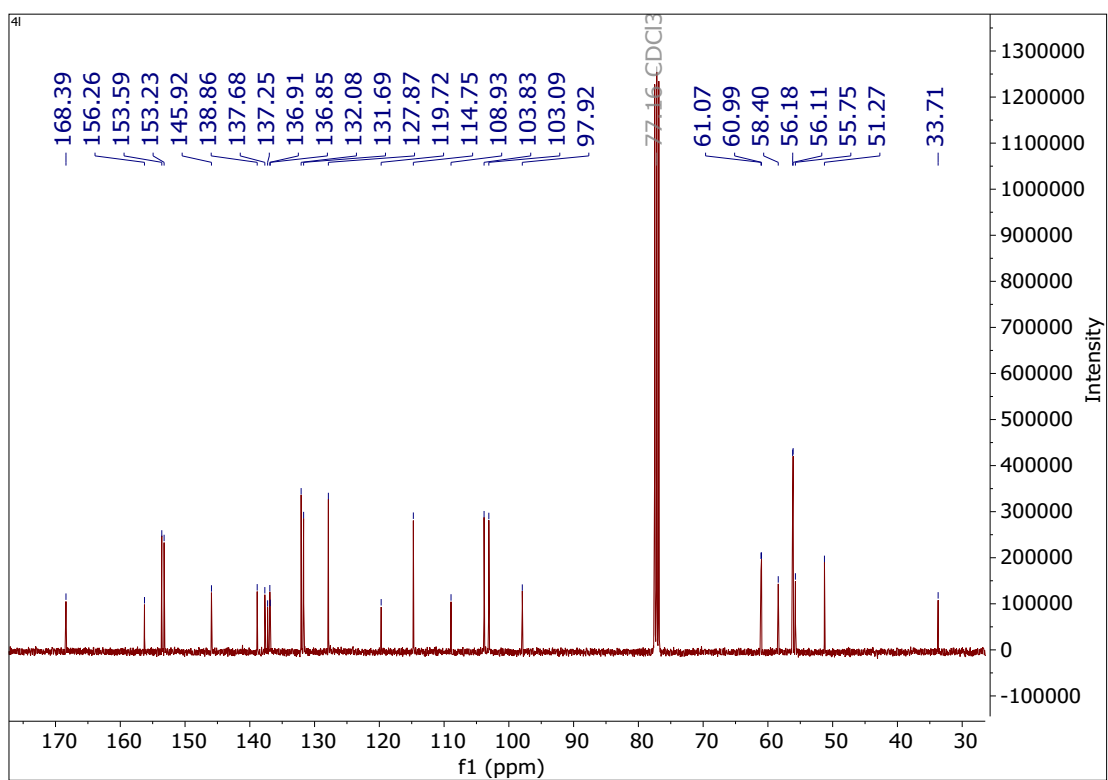

### <sup>1</sup>H NMR spectrum of 4m

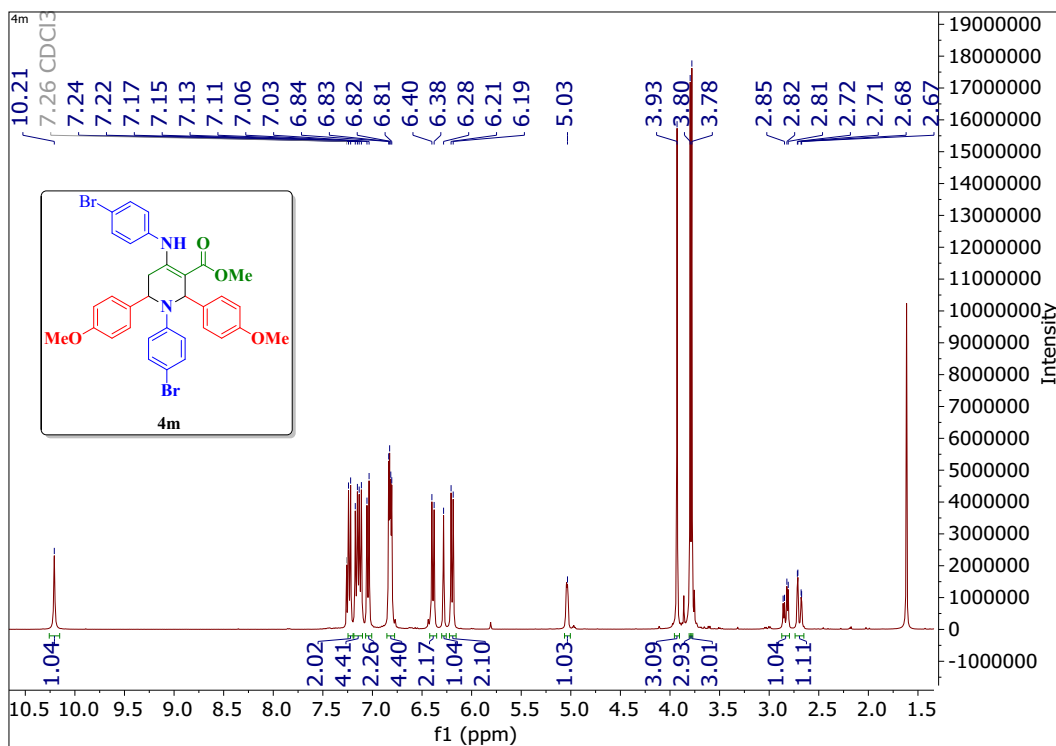

### <sup>13</sup>C NMR spectrum of 4m

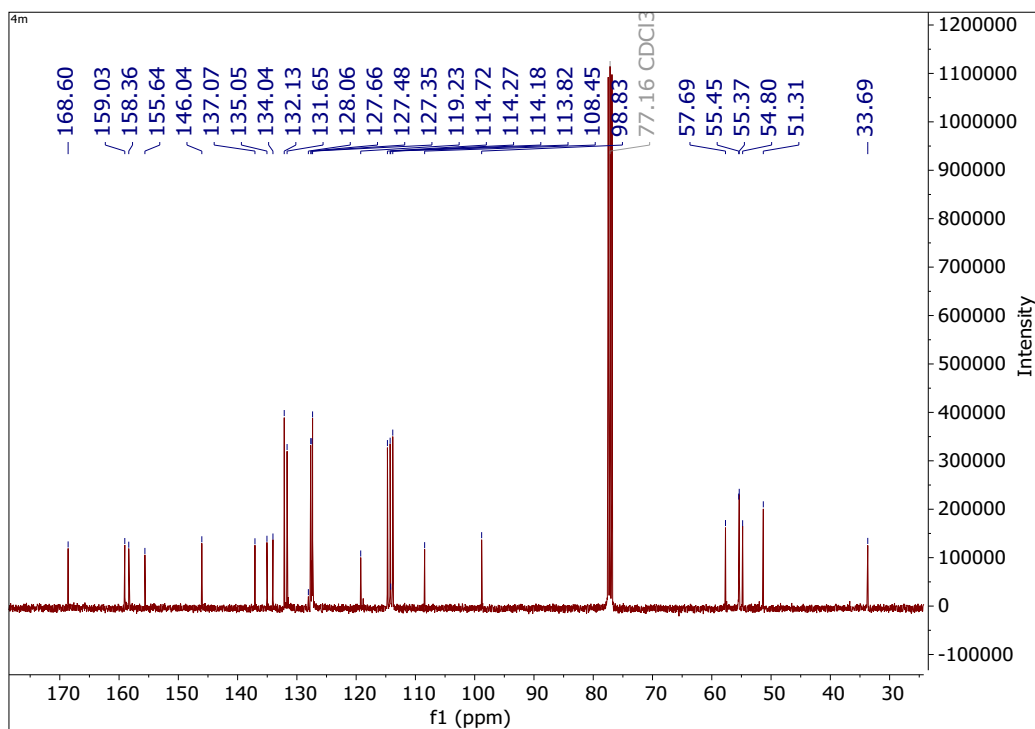



### <sup>1</sup>H NMR spectrum of 4n

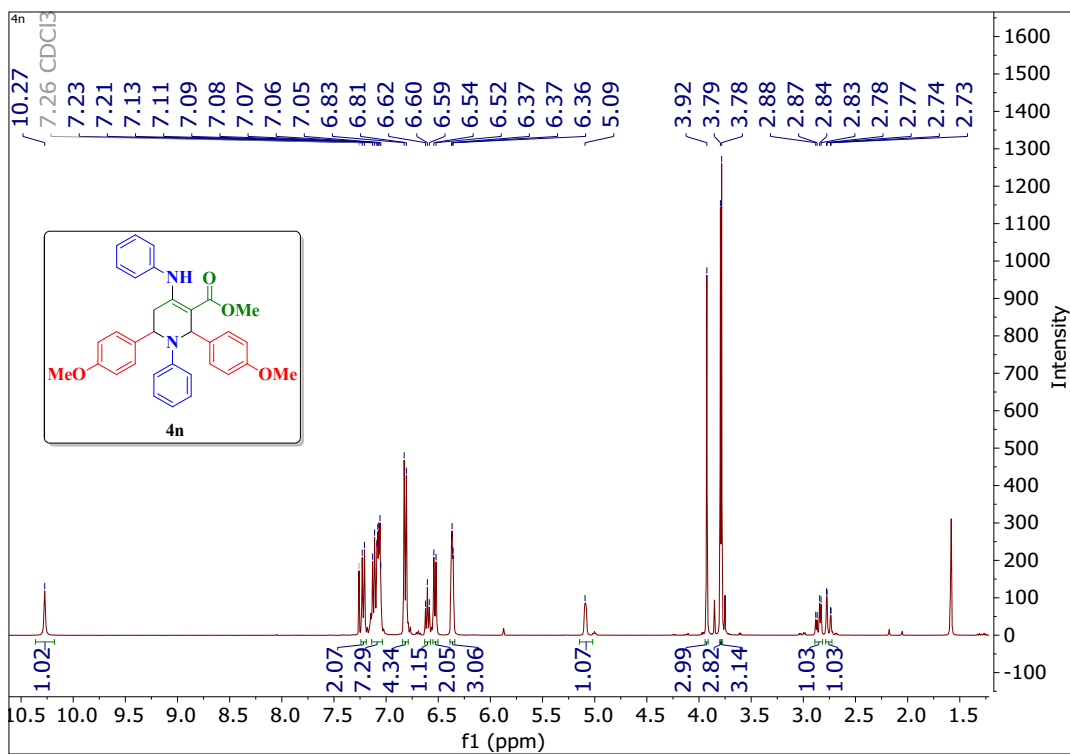

### <sup>13</sup>C NMR Spectrum of 4n

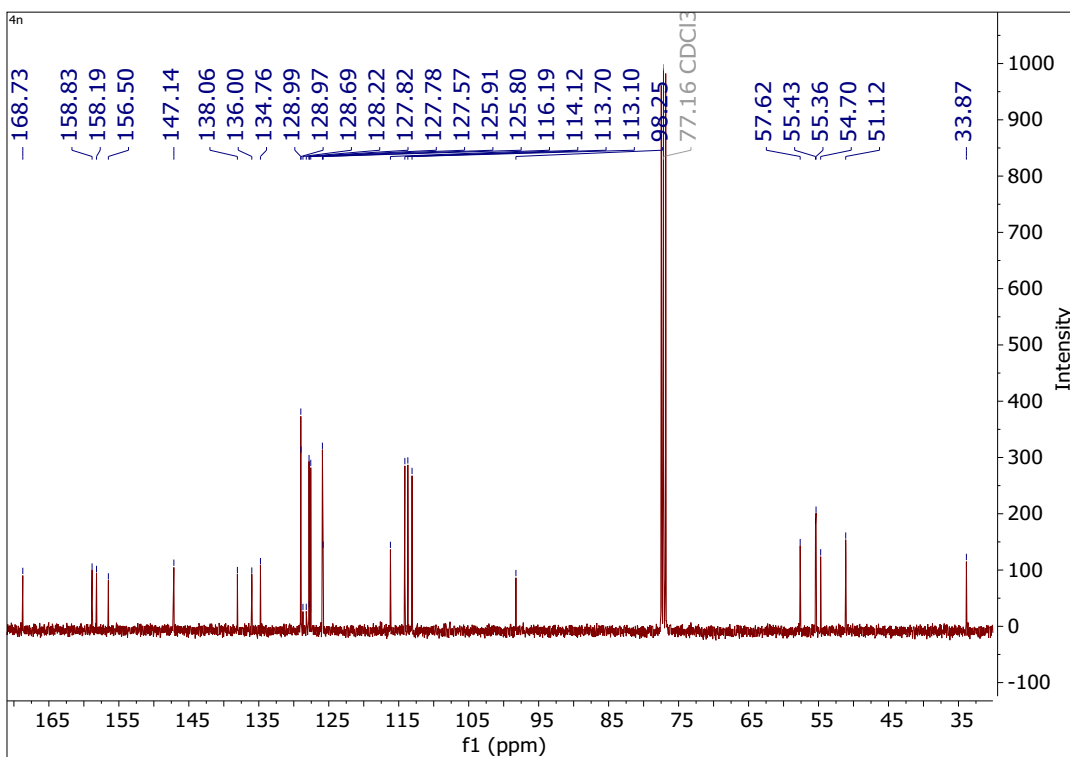

### <sup>1</sup>H NMR spectrum of 4o

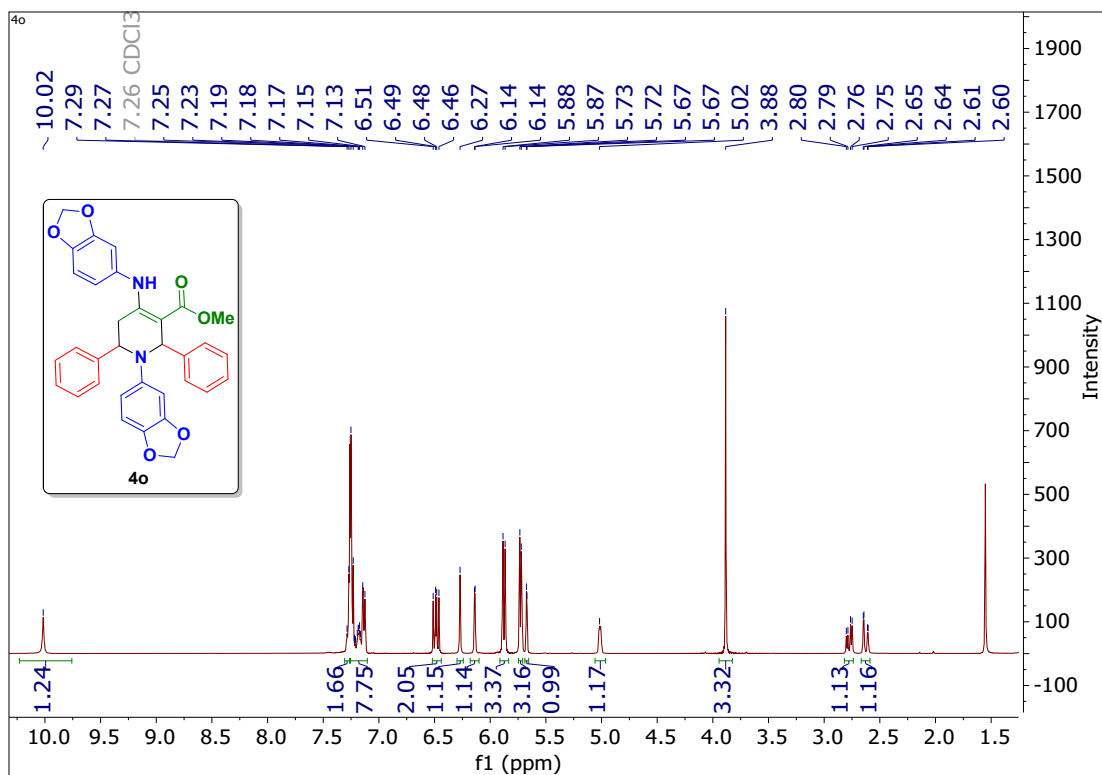

### <sup>13</sup>C NMR spectrum of 4o

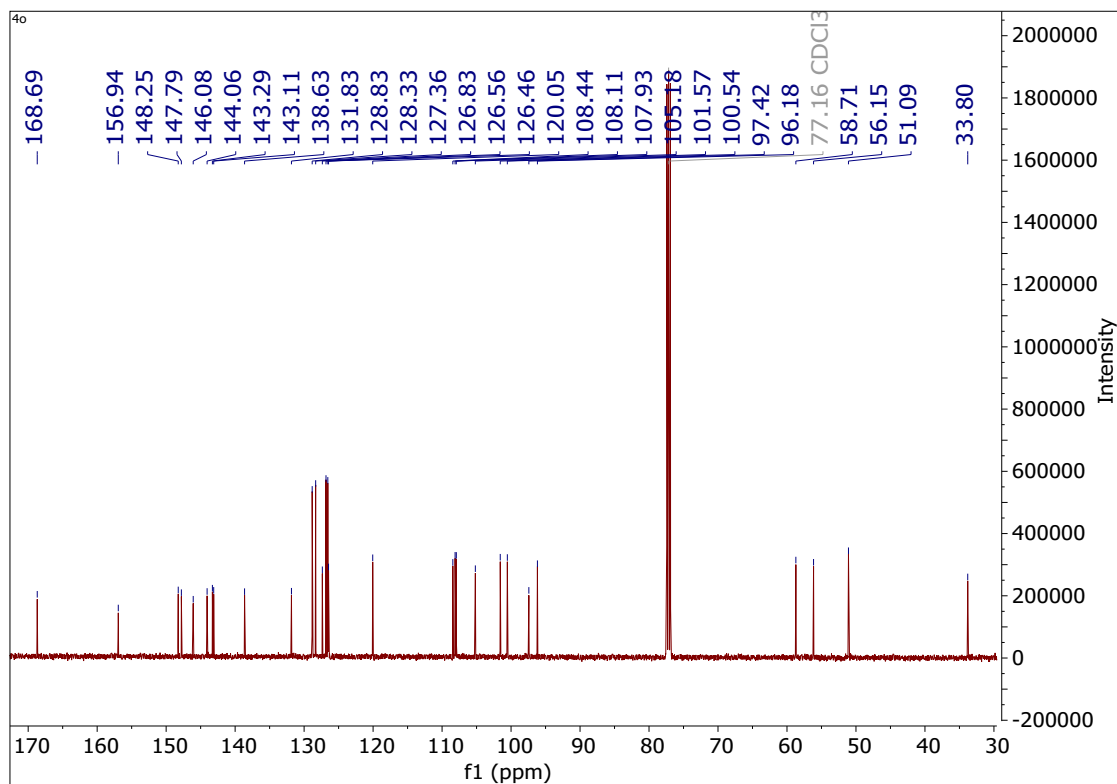

### <sup>1</sup>H NMR spectrum of 4p

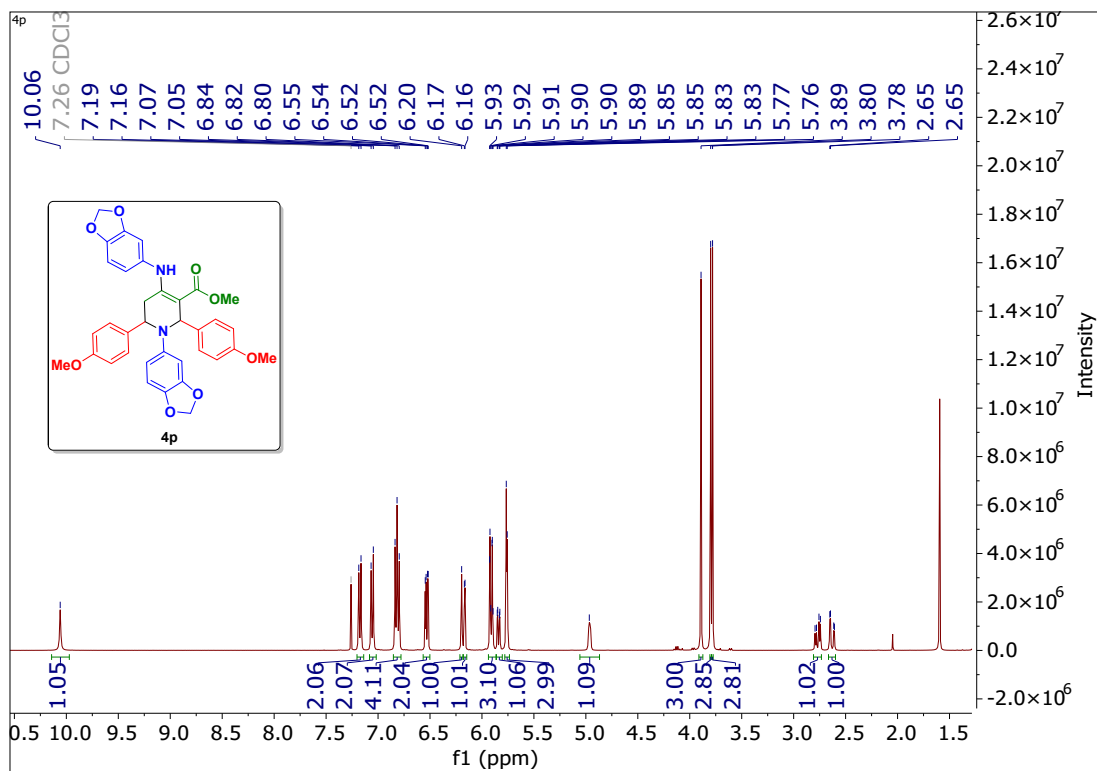

### <sup>13</sup>C NMR spectrum of 4p

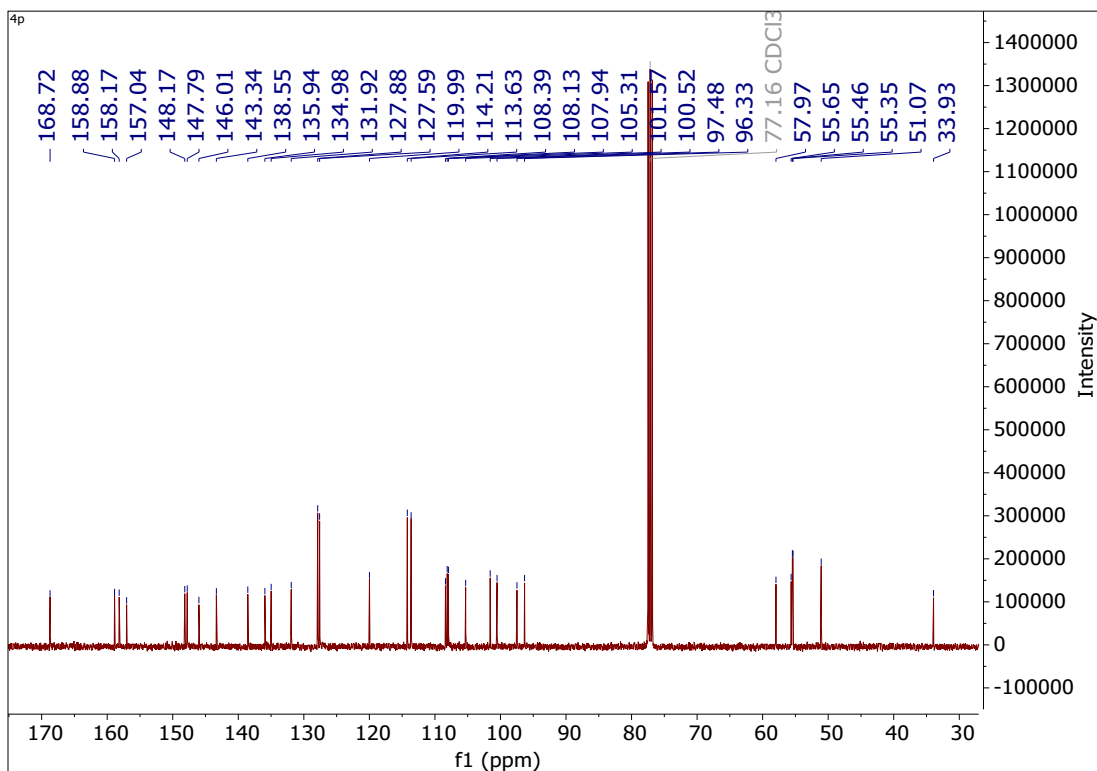

### <sup>1</sup>H NMR spectrum of 4q

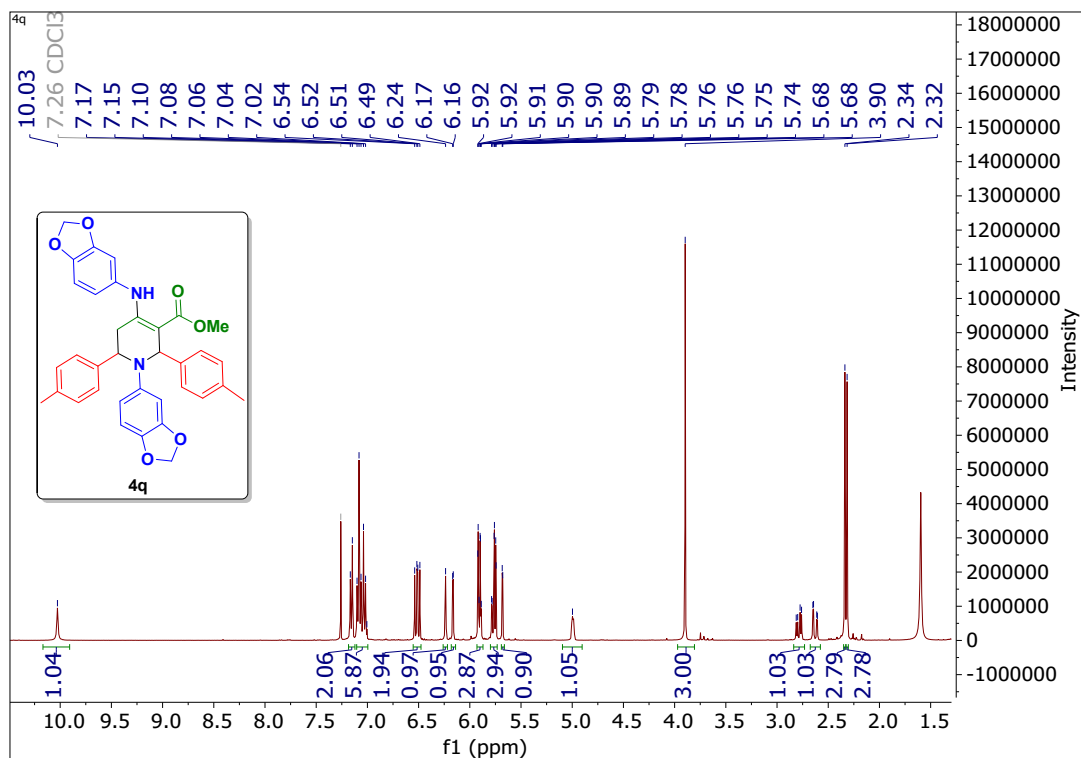

### <sup>13</sup>C NMR spectrum of 4q

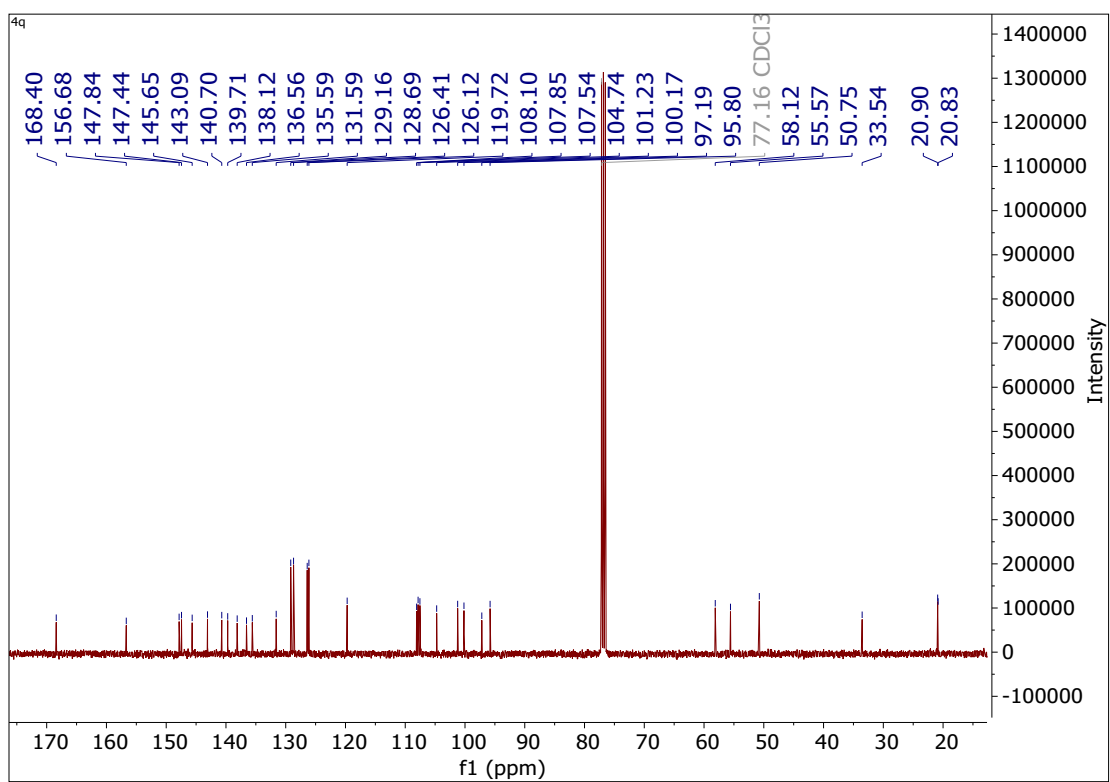

### <sup>1</sup>H NMR spectrum of 4r

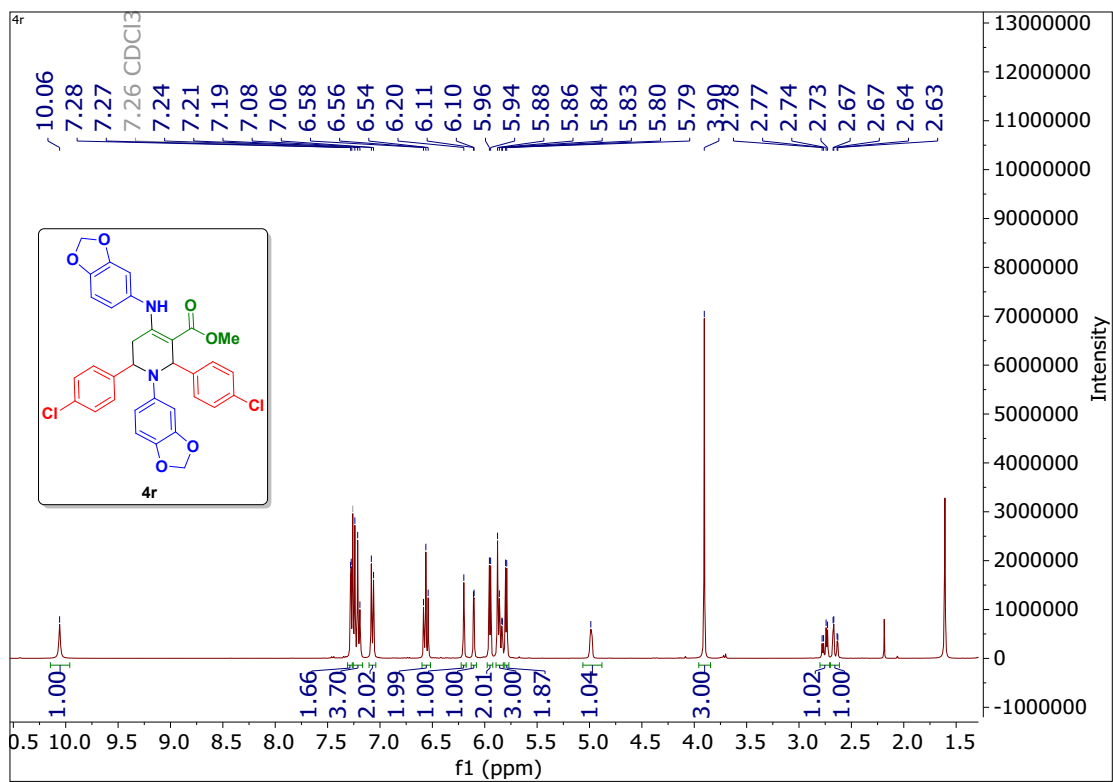

### <sup>13</sup>C NMR spectrum of 4r

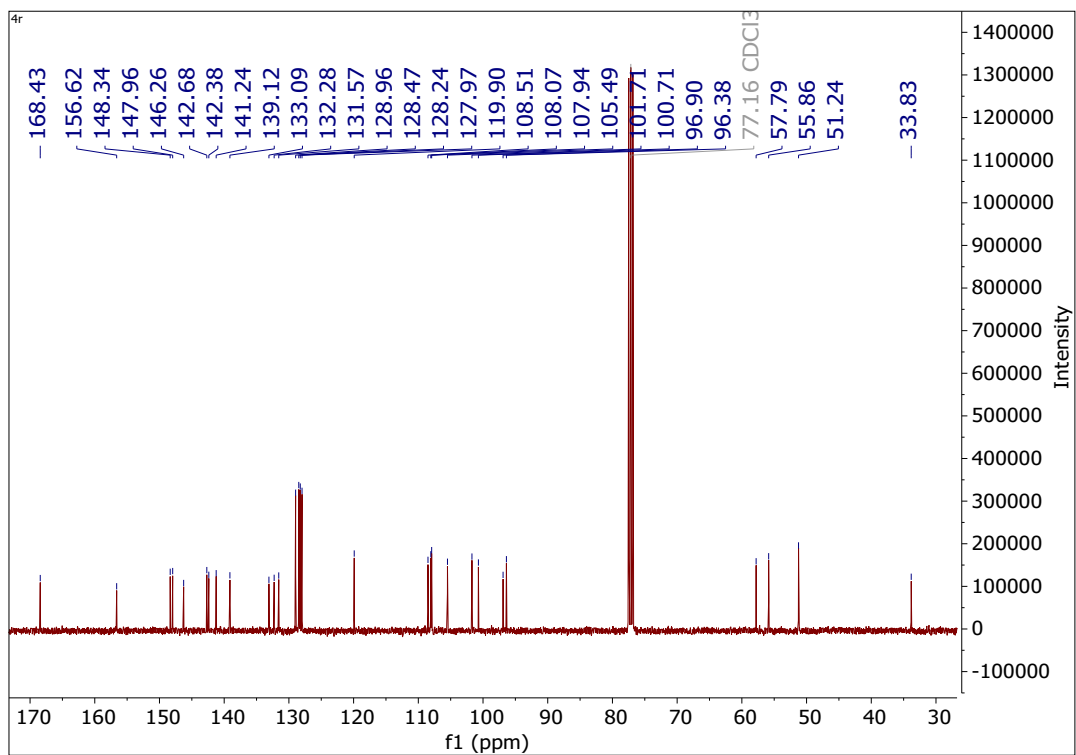

### <sup>1</sup>H NMR spectrum of 4s

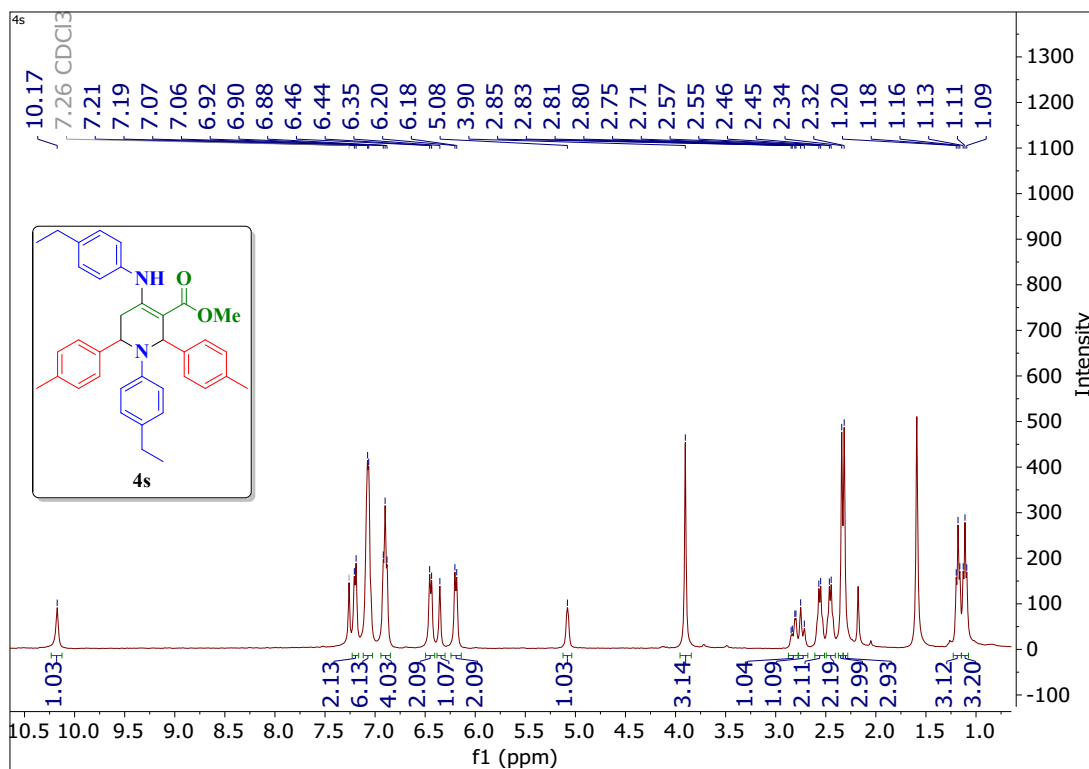

### <sup>13</sup>C NMR spectrum of 4s

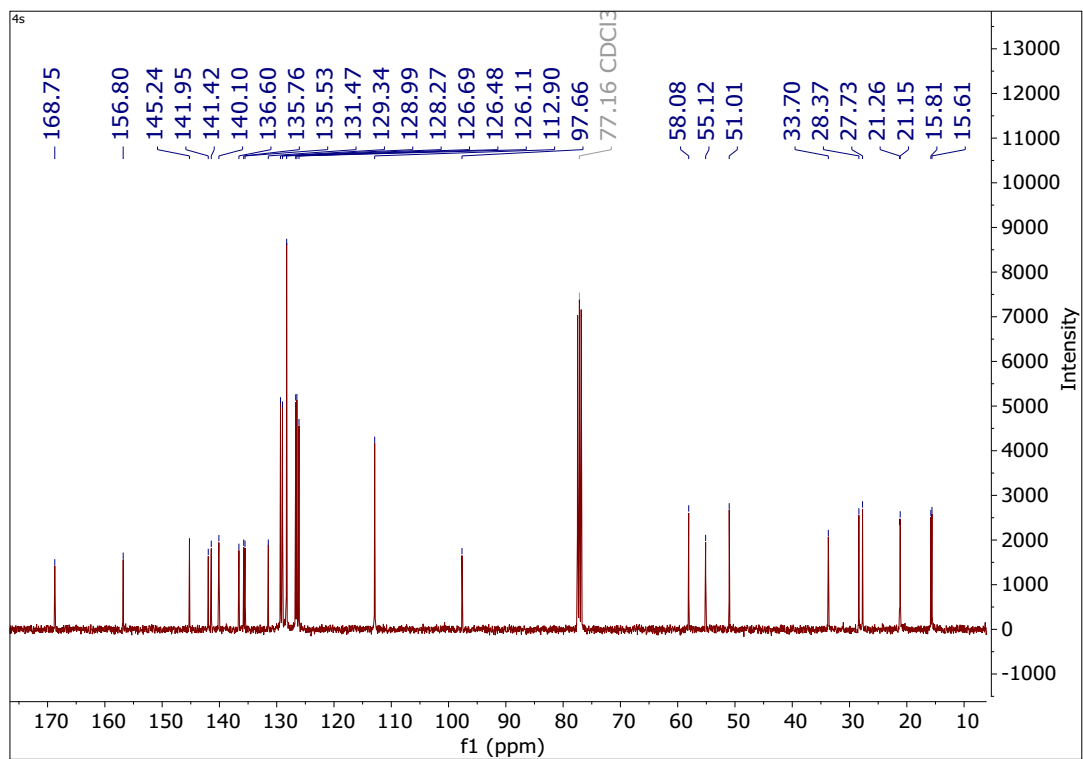

### <sup>1</sup>H NMR spectrum of 4t

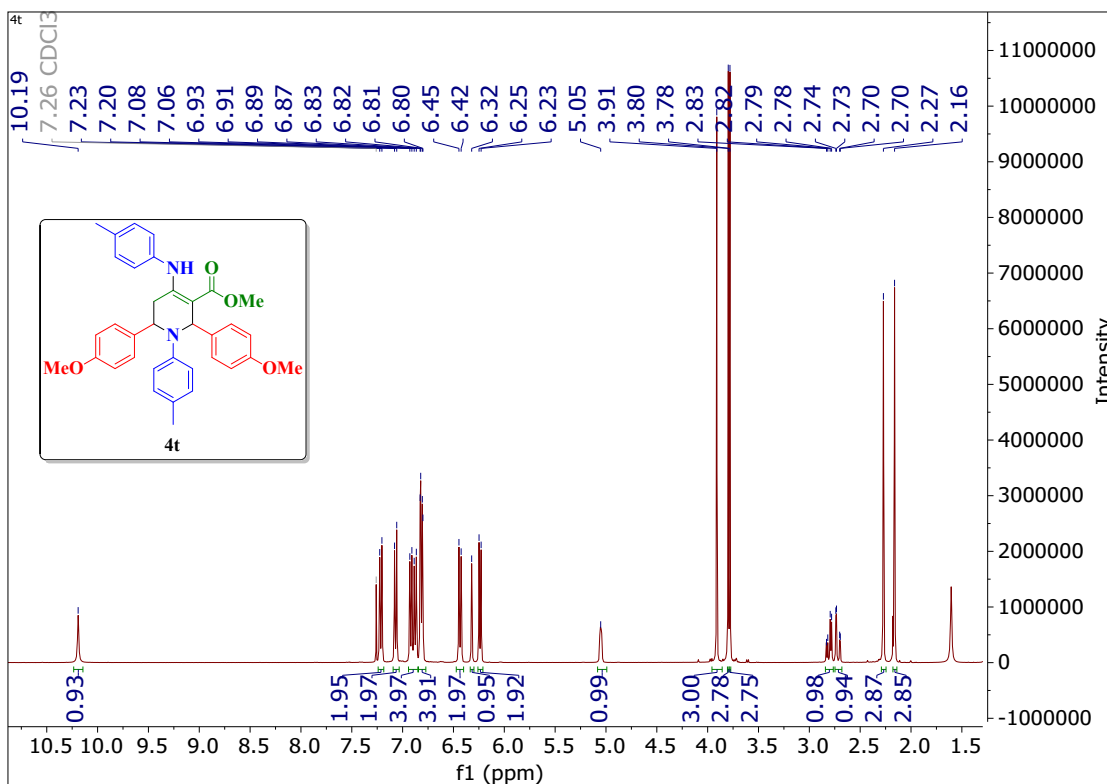

### <sup>13</sup>C NMR spectrum of 4t

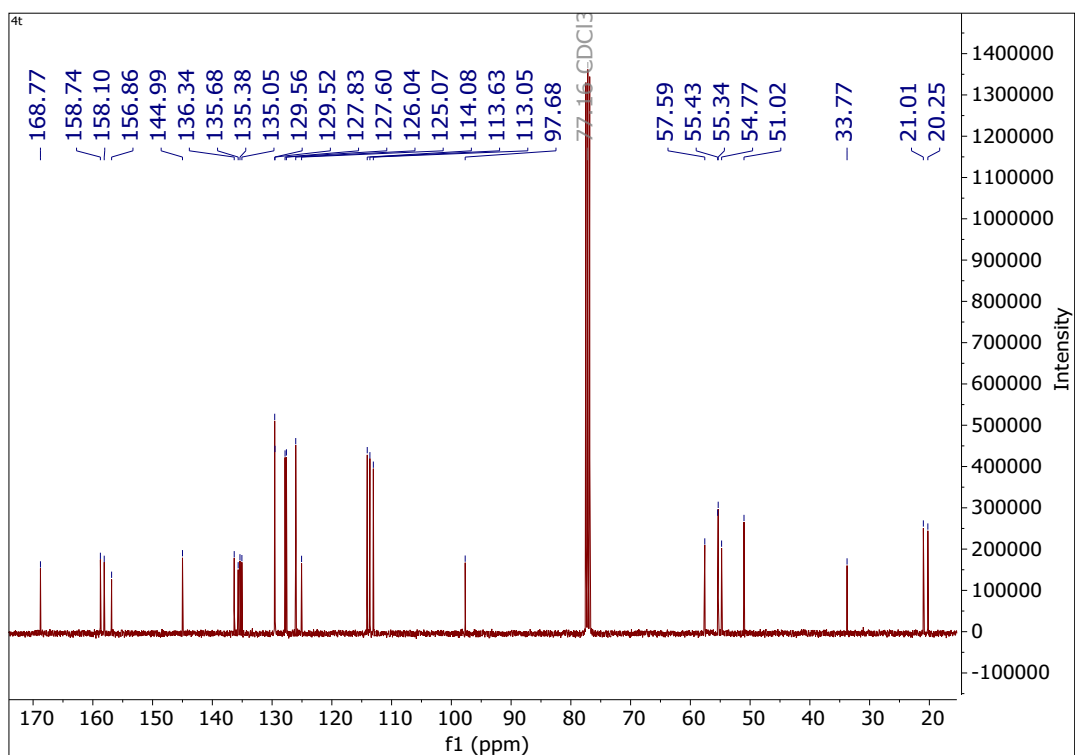

### <sup>1</sup>H NMR spectrum of 5a

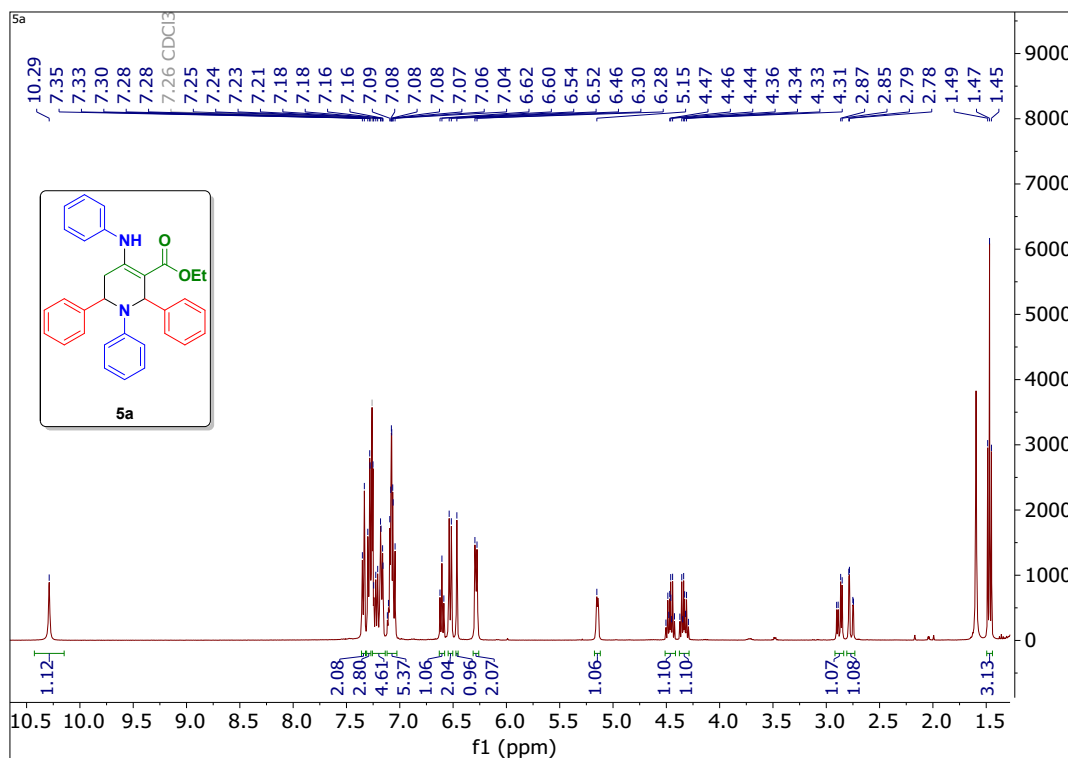

### <sup>13</sup>C NMR spectrum of 5a

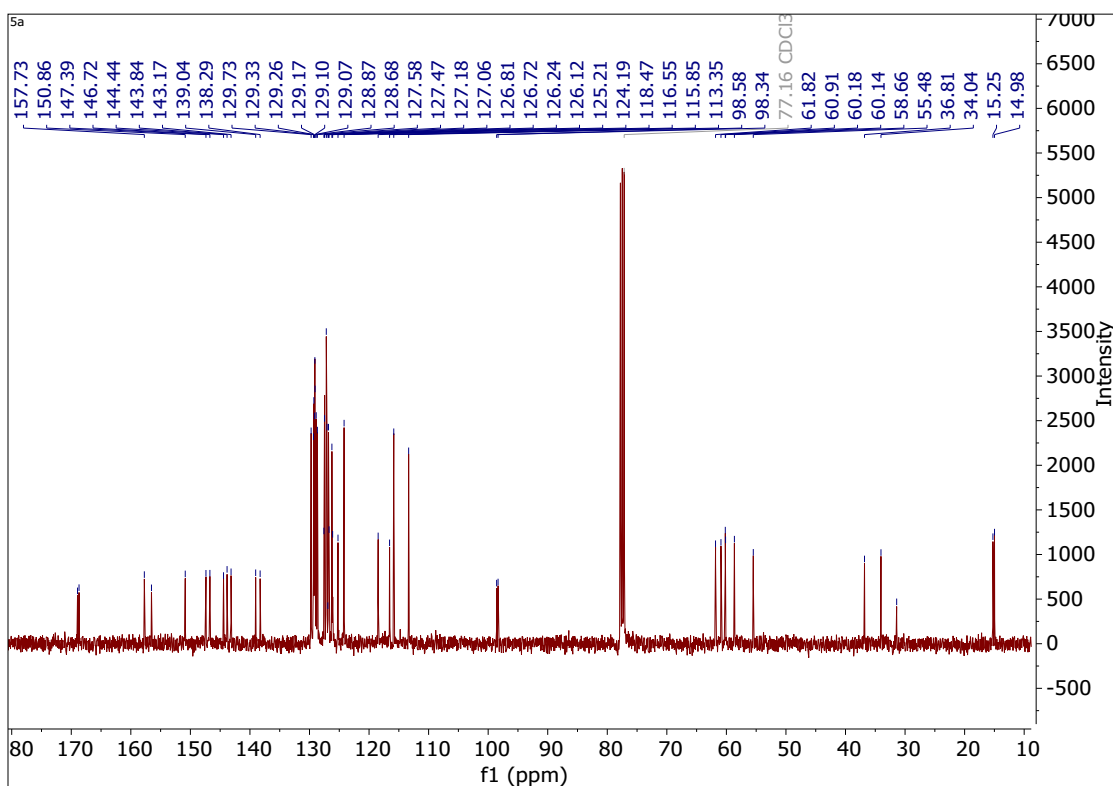



### <sup>1</sup>H NMR spectrum of 5b

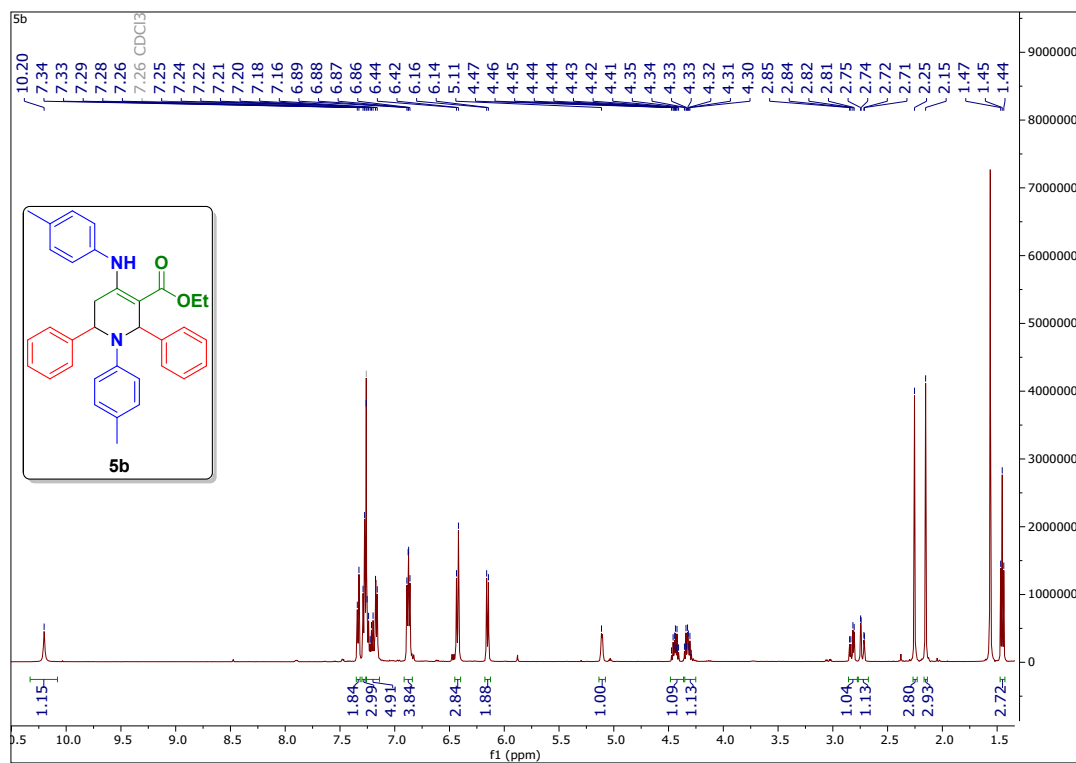

### <sup>13</sup>C NMR spectrum of 5b

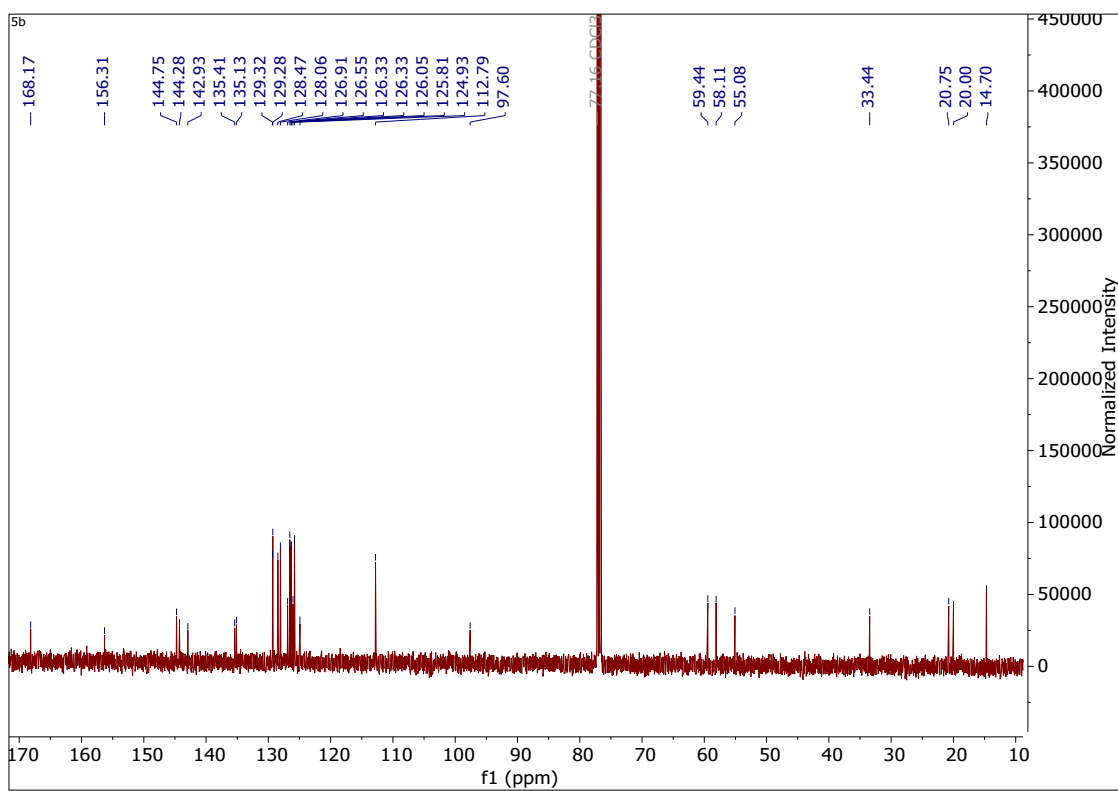

### <sup>1</sup>H NMR spectrum of 5c

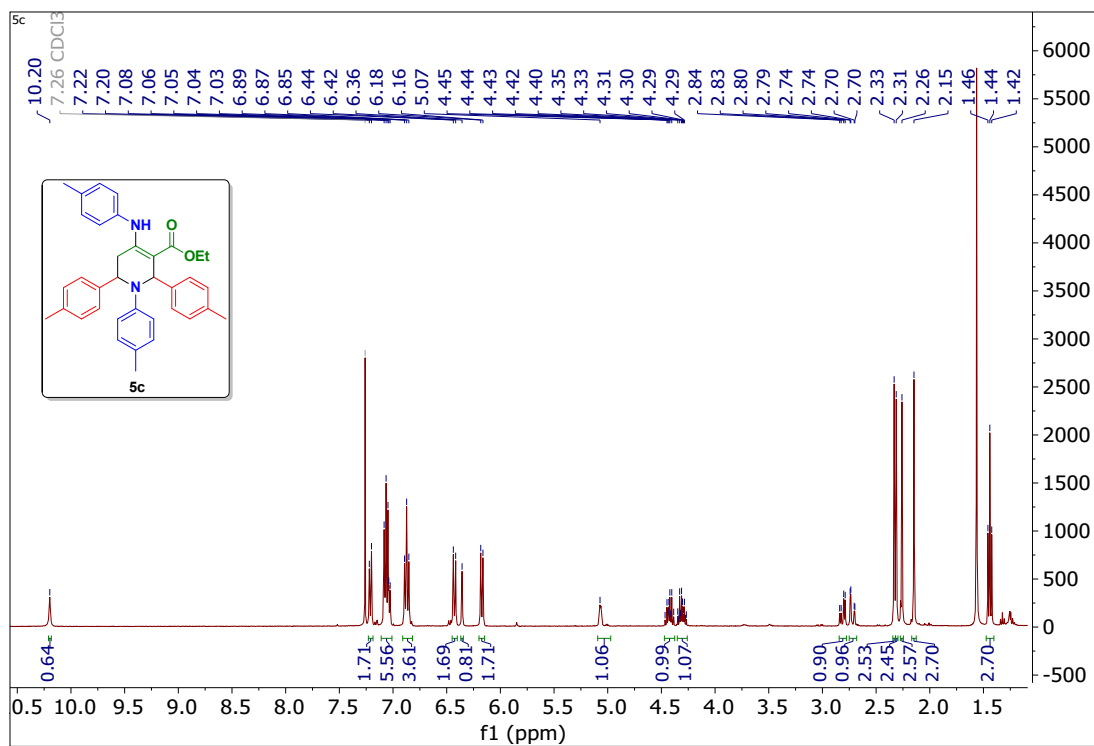

### <sup>13</sup>C NMR spectrum of 5c

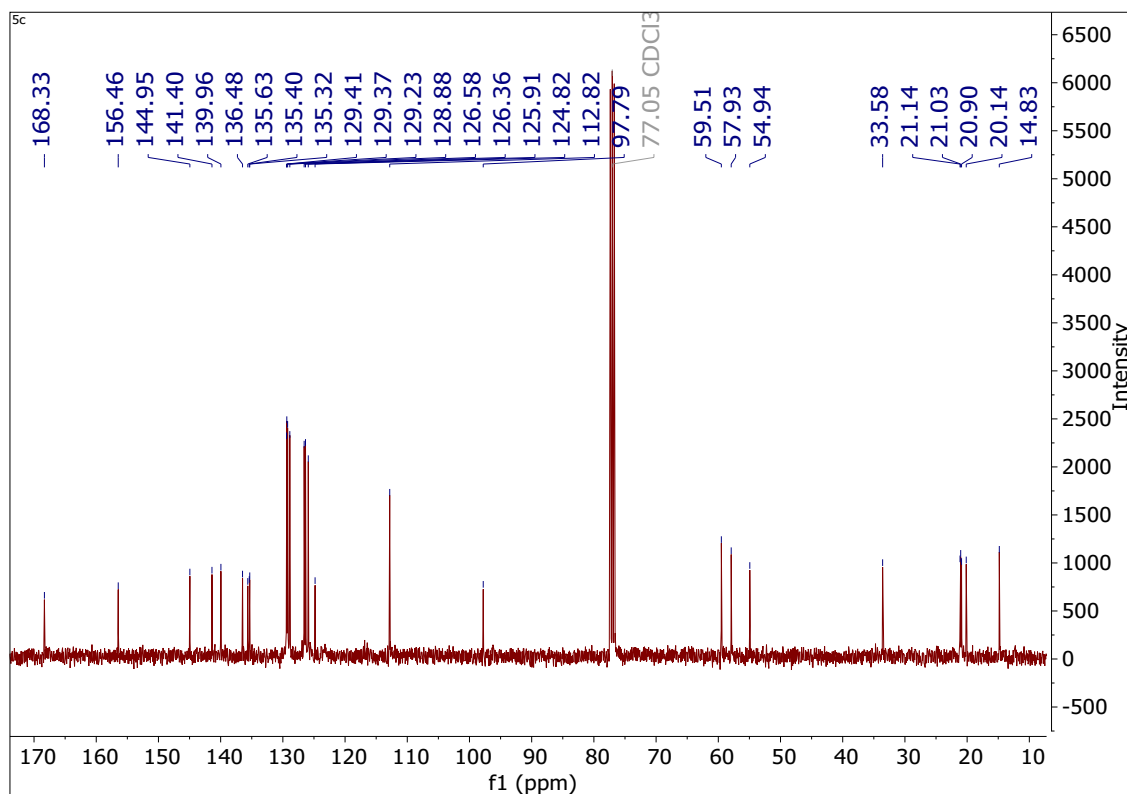

### <sup>1</sup>H NMR spectrum of 5d

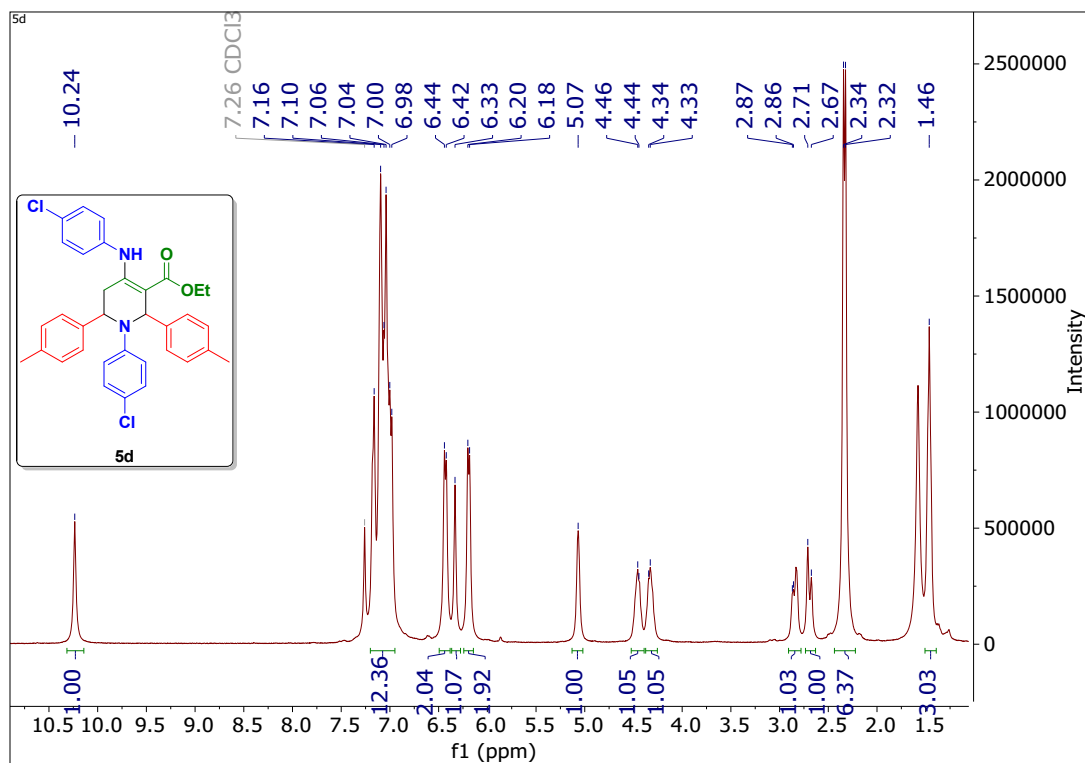

### <sup>13</sup>C NMR spectrum of 5d

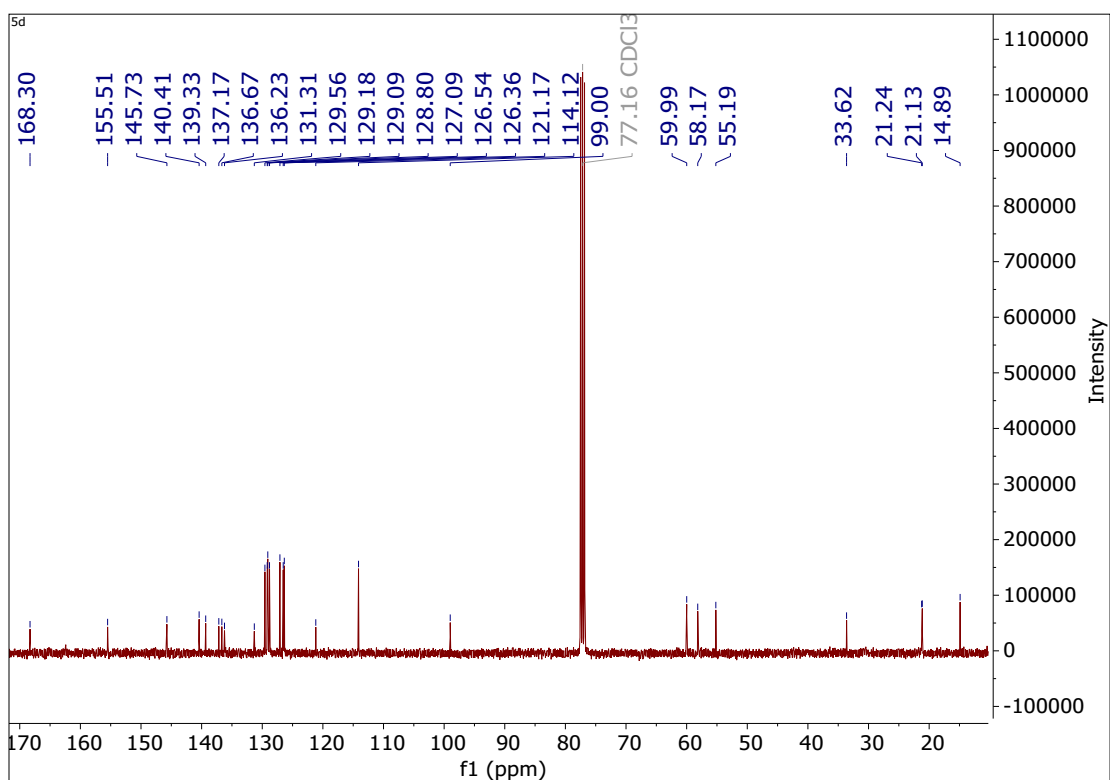

### <sup>1</sup>H NMR spectrum of 5e

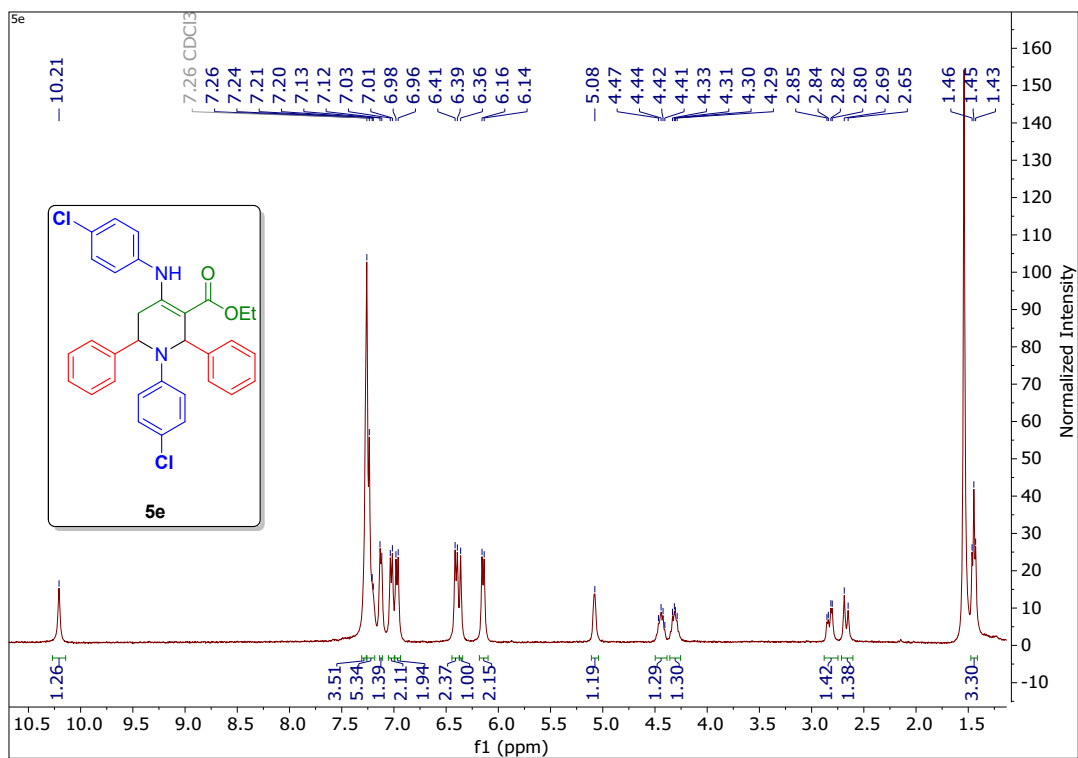

### <sup>13</sup>C NMR spectrum of 5e

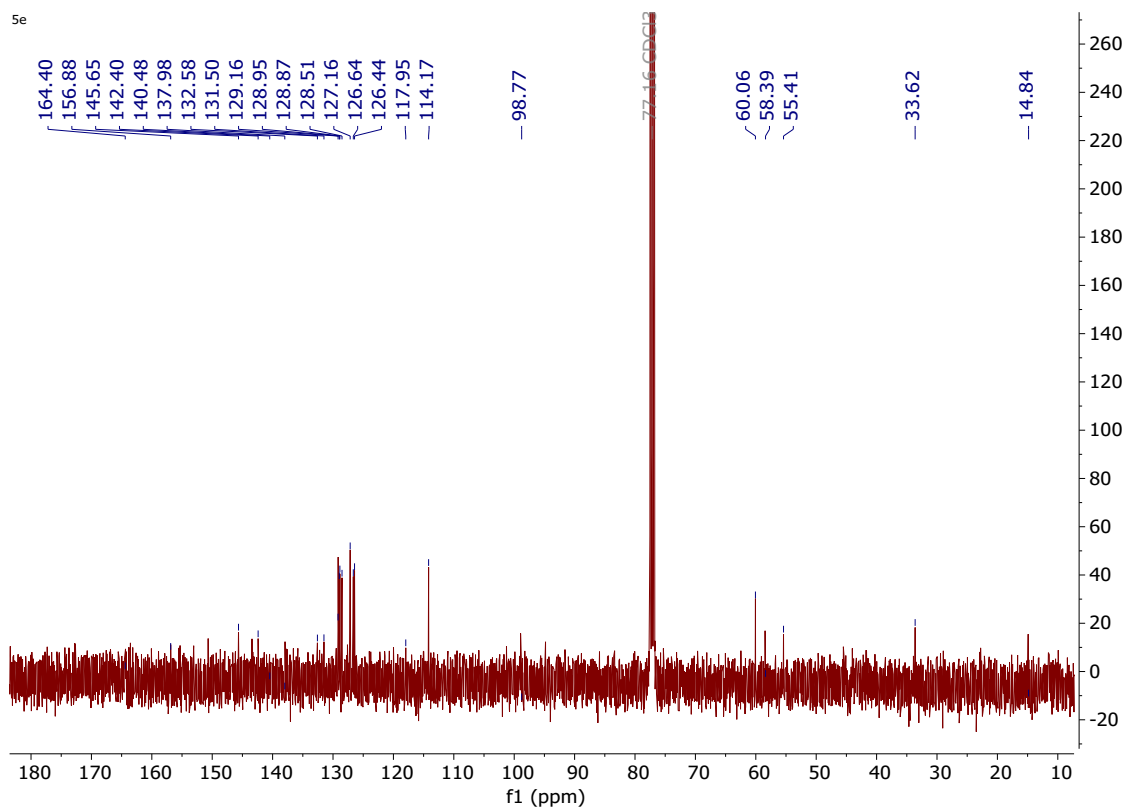

### <sup>1</sup>H NMR spectrum of 5f

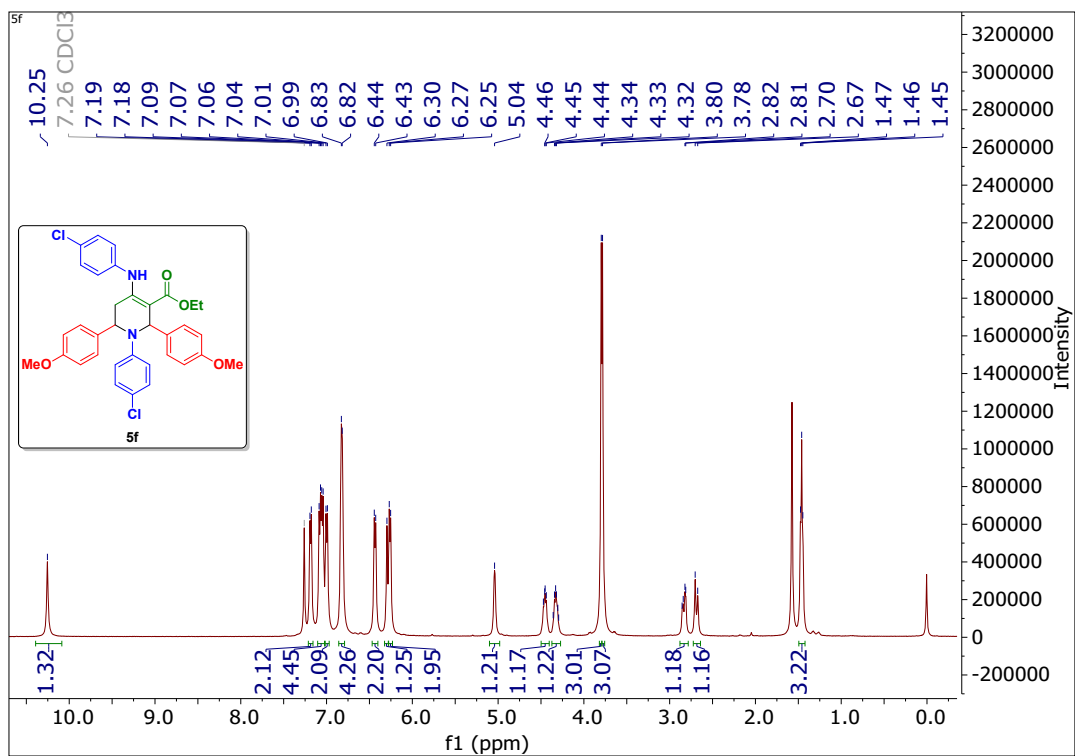

### <sup>13</sup>C NMR spectrum of 5f

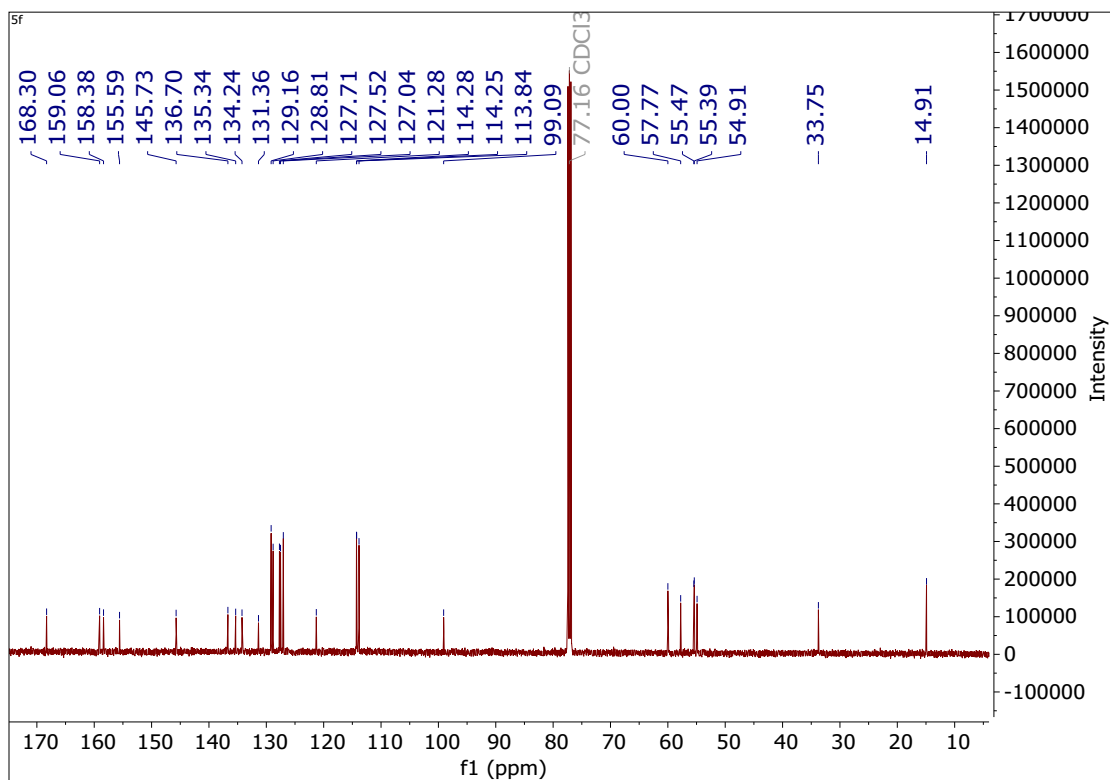

### <sup>1</sup>H NMR spectrum of 5g

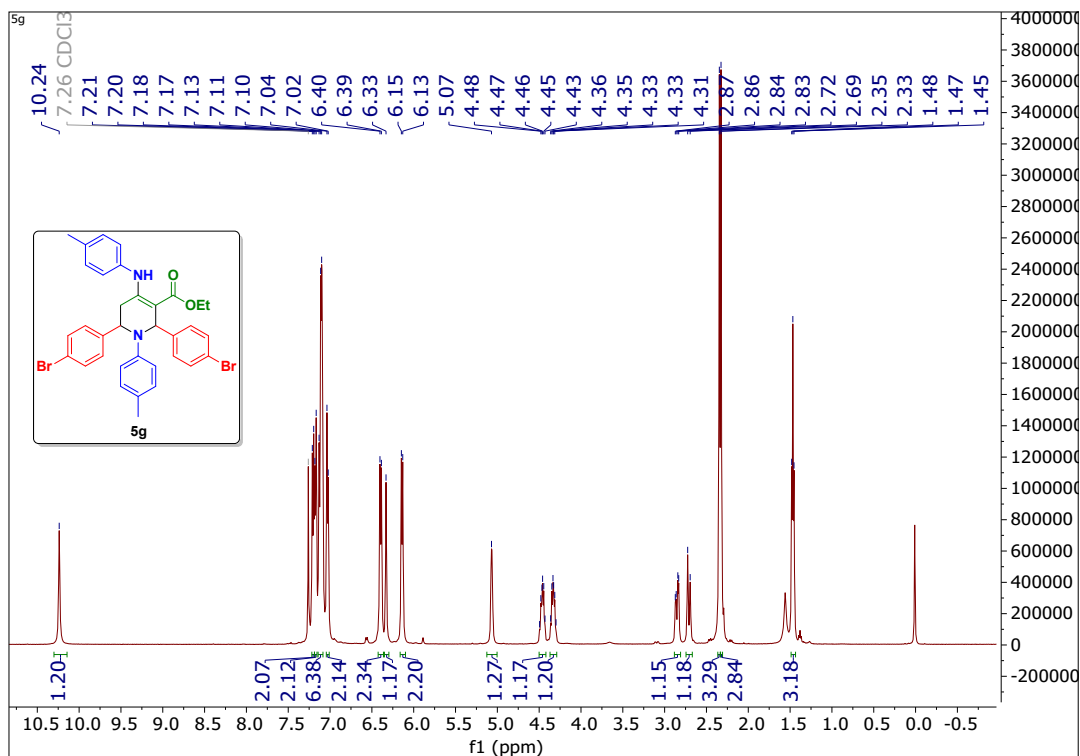

### <sup>13</sup>C NMR spectrum of 5g

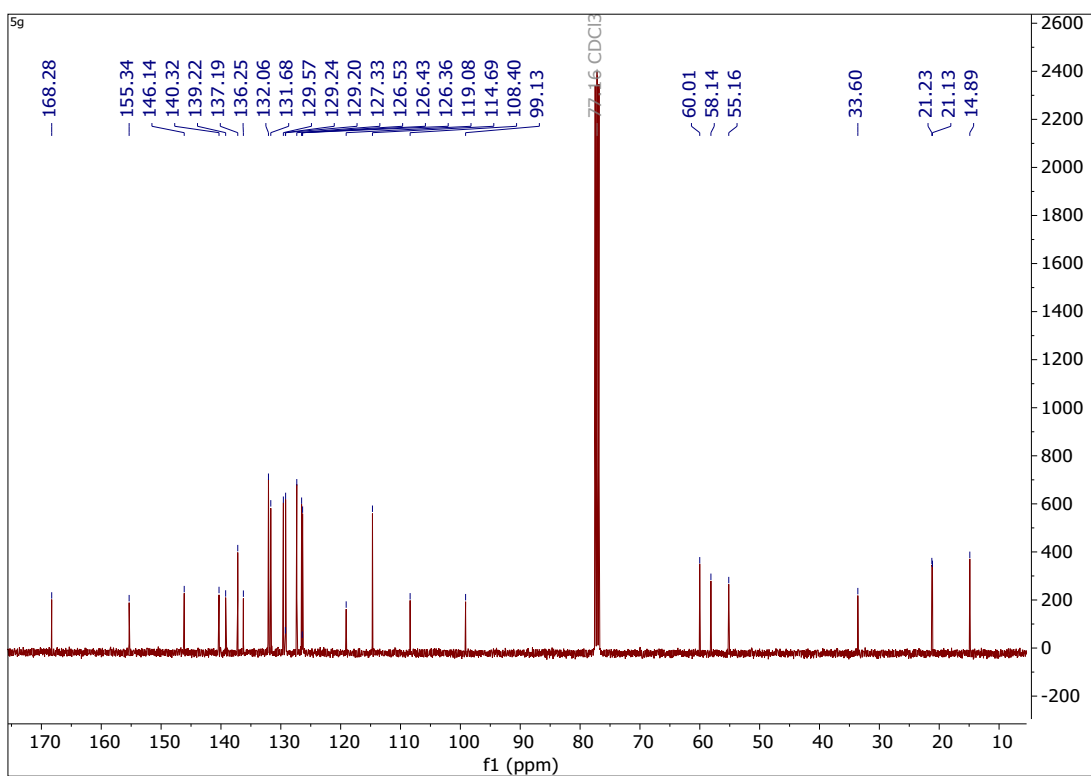

### <sup>1</sup>H NMR spectrum of 5h

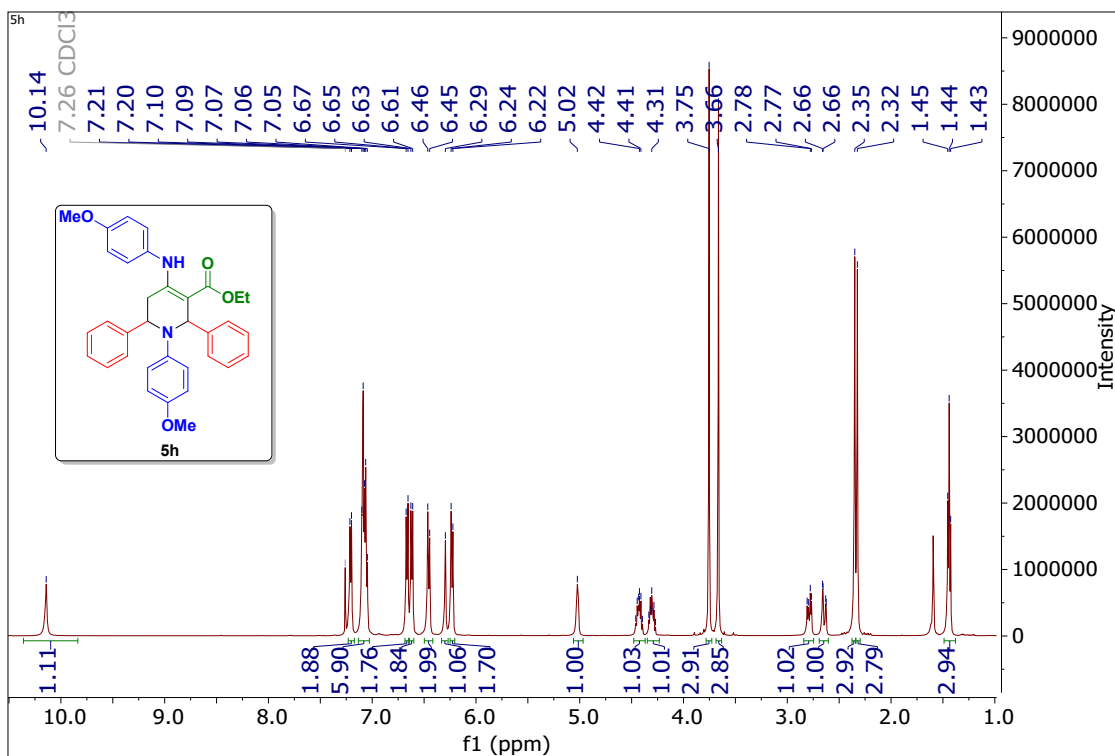

### <sup>13</sup>C NMR spectrum of 5h

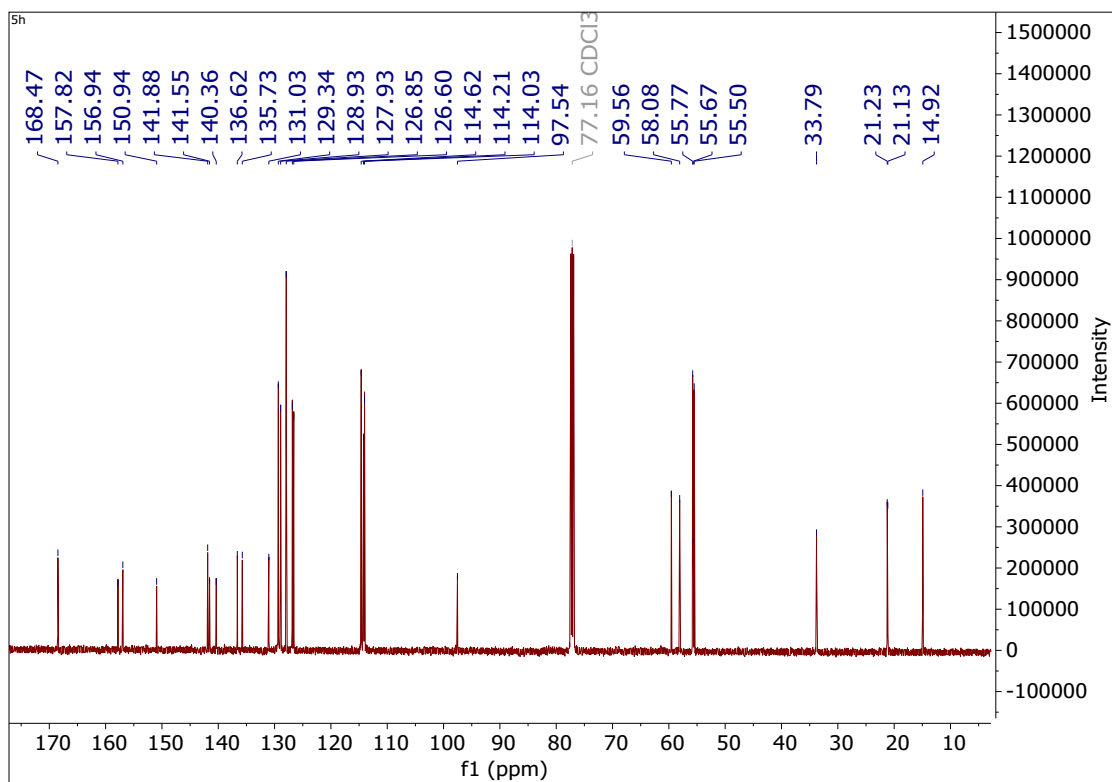

### <sup>1</sup>H NMR spectrum of 5i

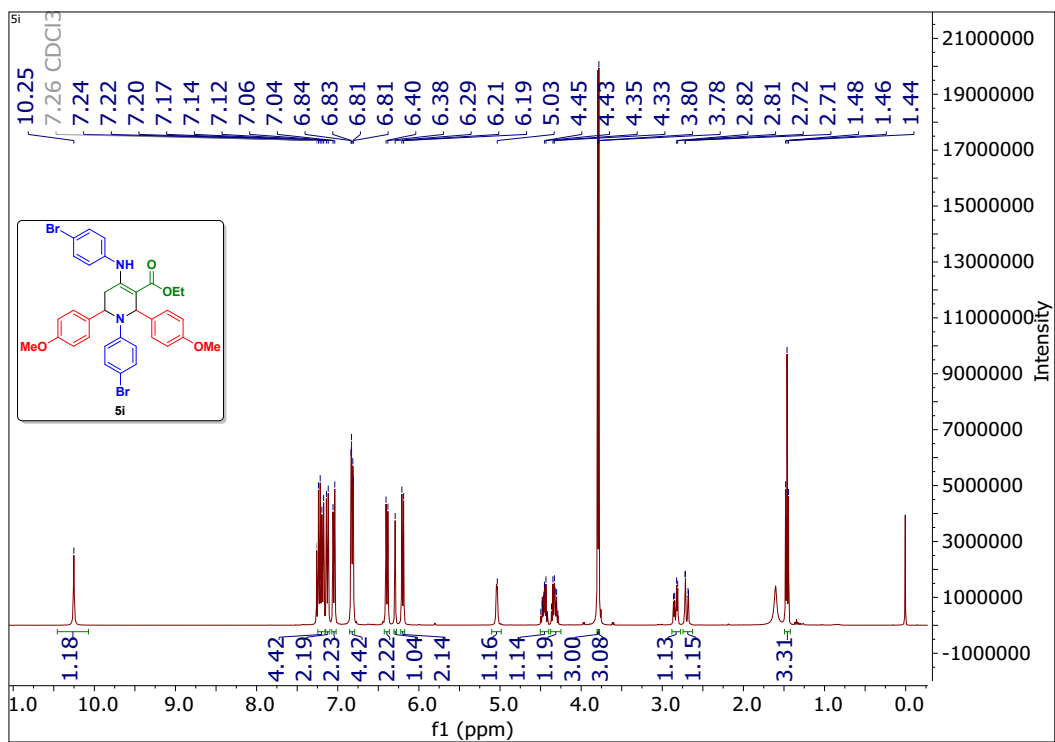

### <sup>13</sup>C NMR spectrum of 5i

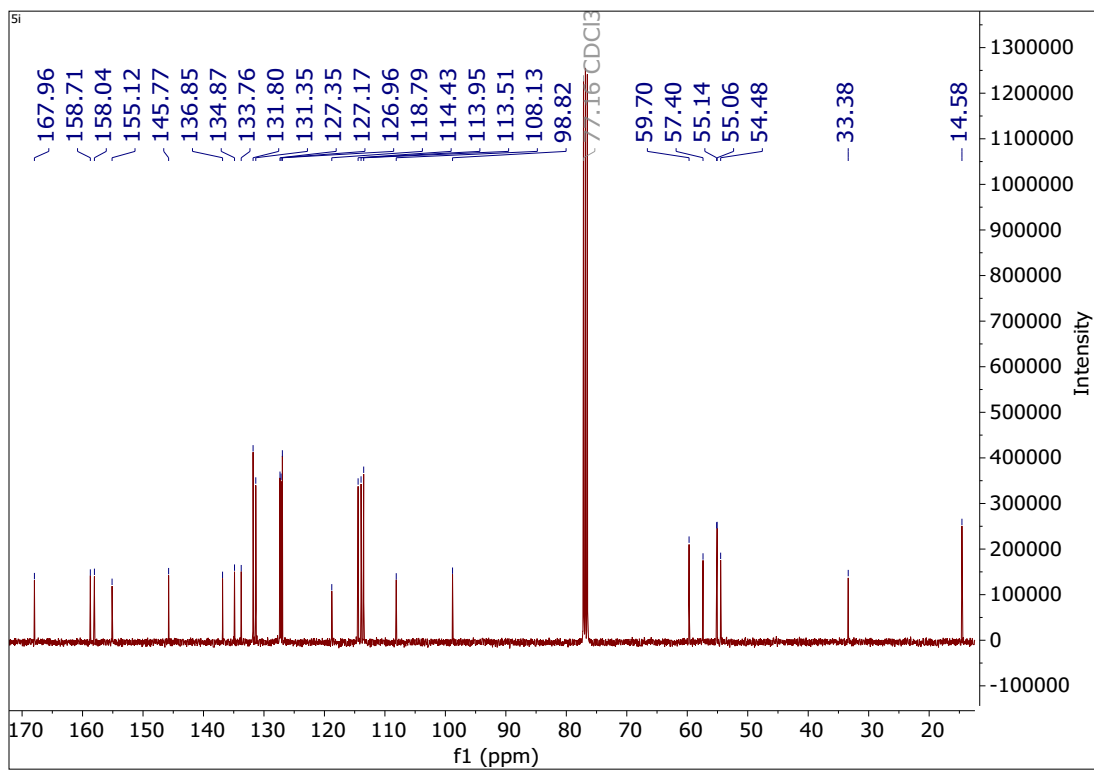



### <sup>1</sup>H NMR spectrum of 5j

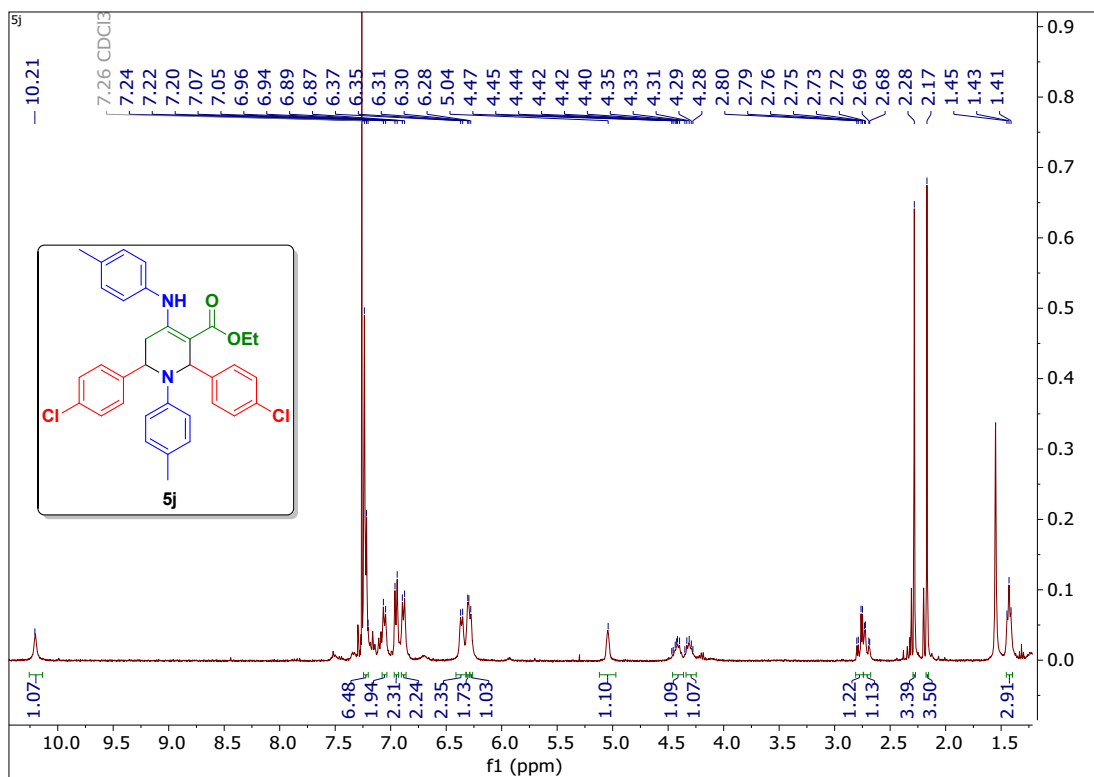

### <sup>13</sup>C NMR spectrum of 5j

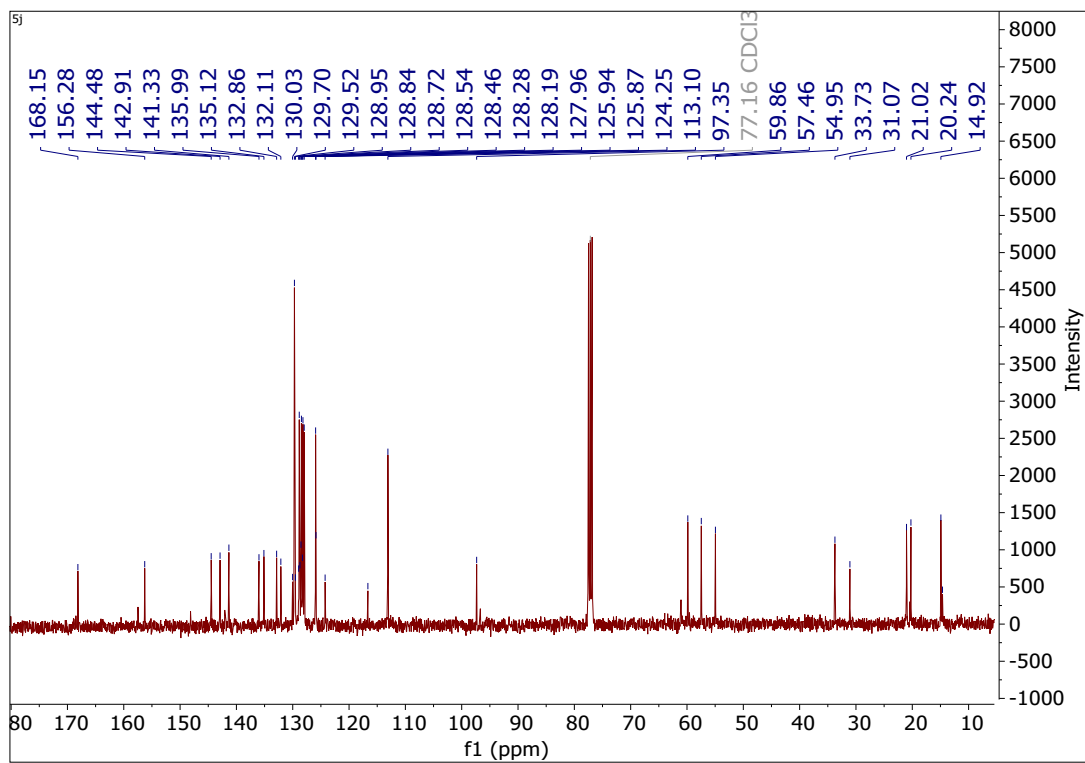

### <sup>1</sup>H NMR spectrum of 5k

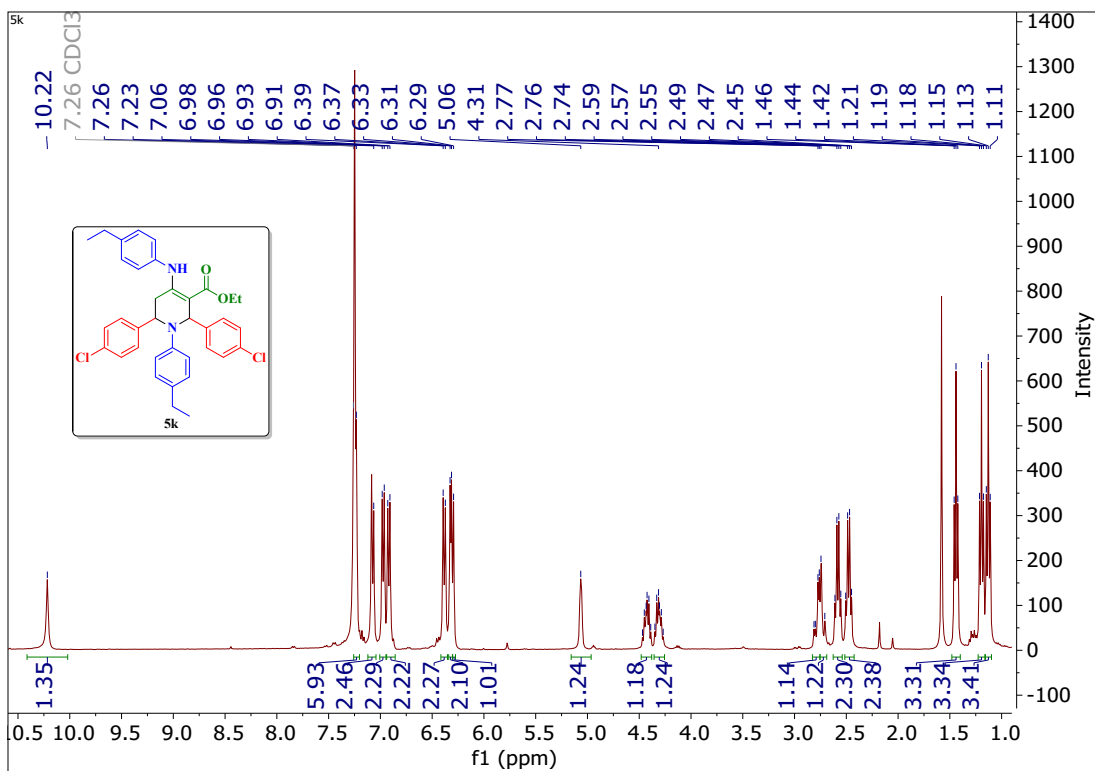

### <sup>13</sup>C NMR spectrum of 5k

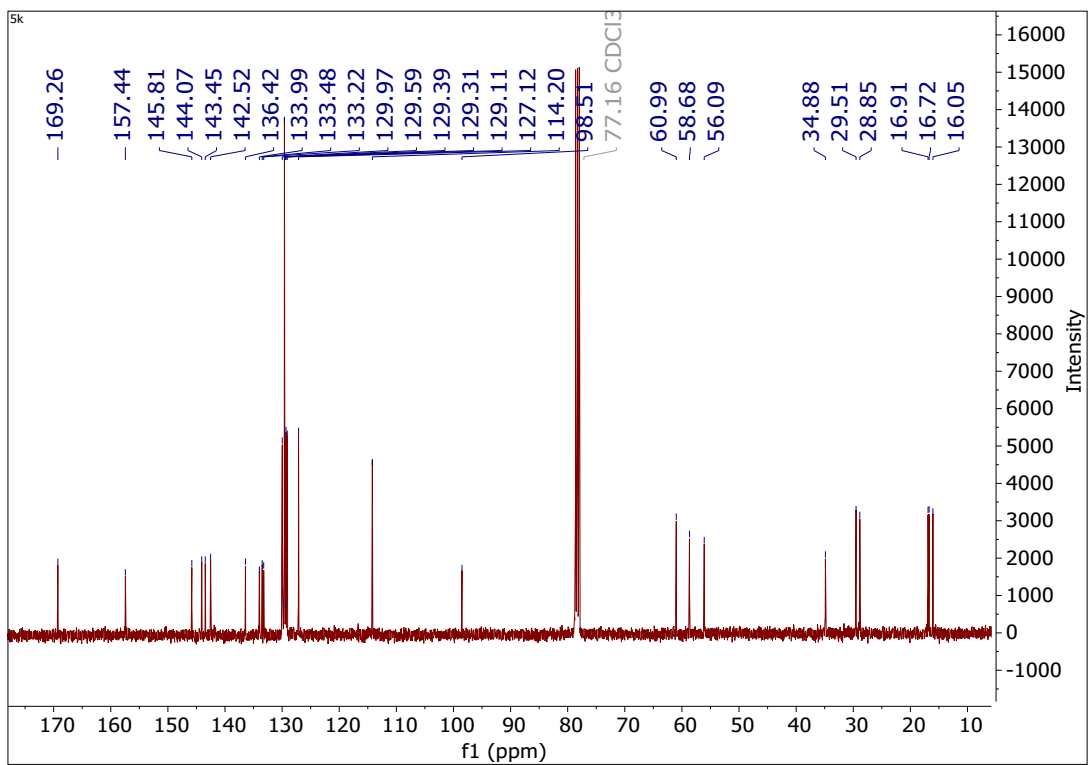

### <sup>1</sup>H NMR spectrum of 5l

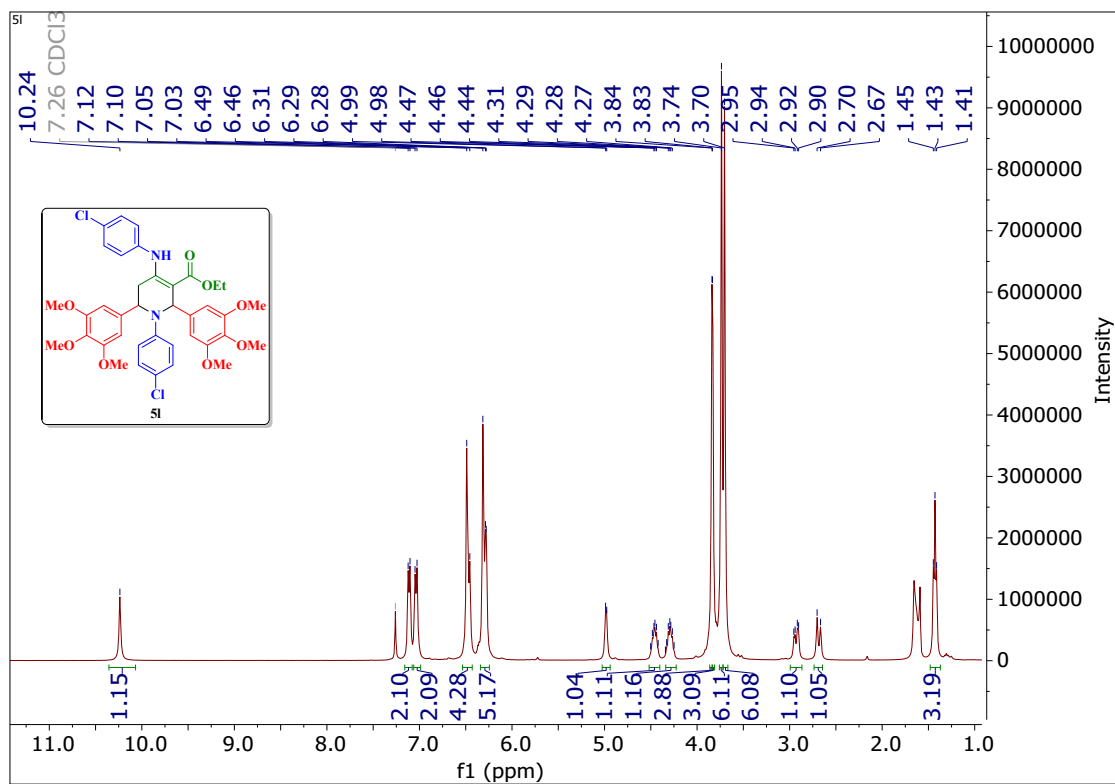

### <sup>13</sup>C NMR spectrum of 5l

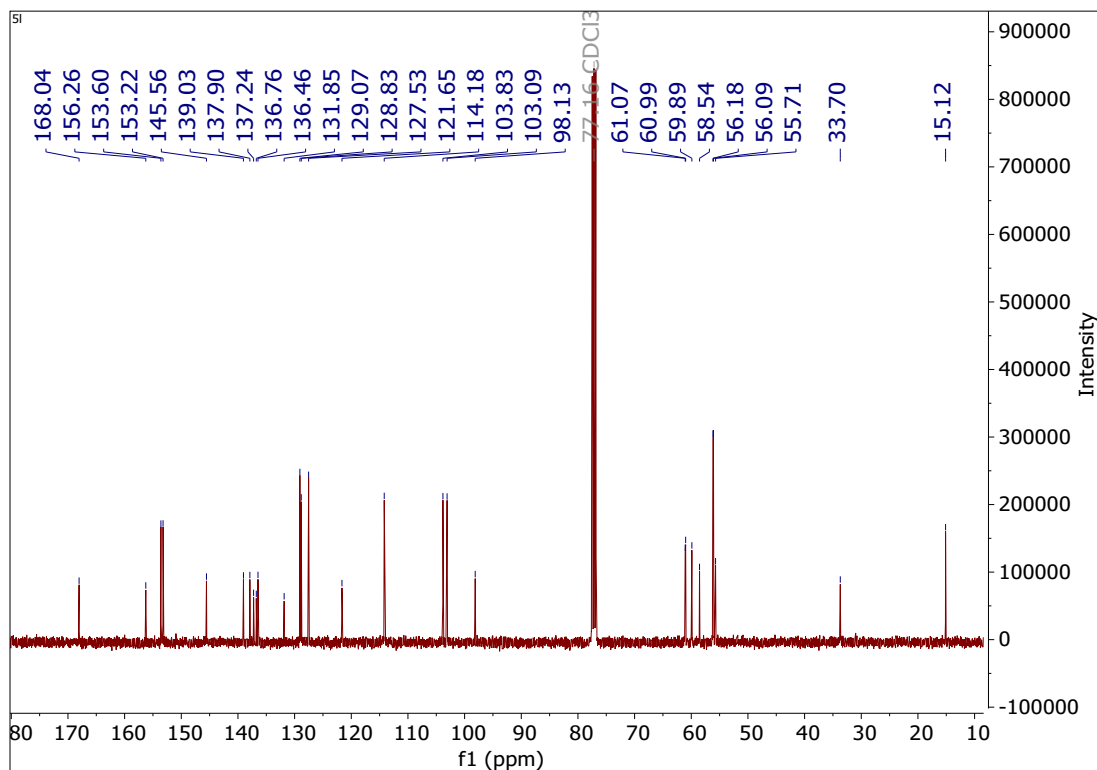

### <sup>1</sup>H NMR spectrum of 5m

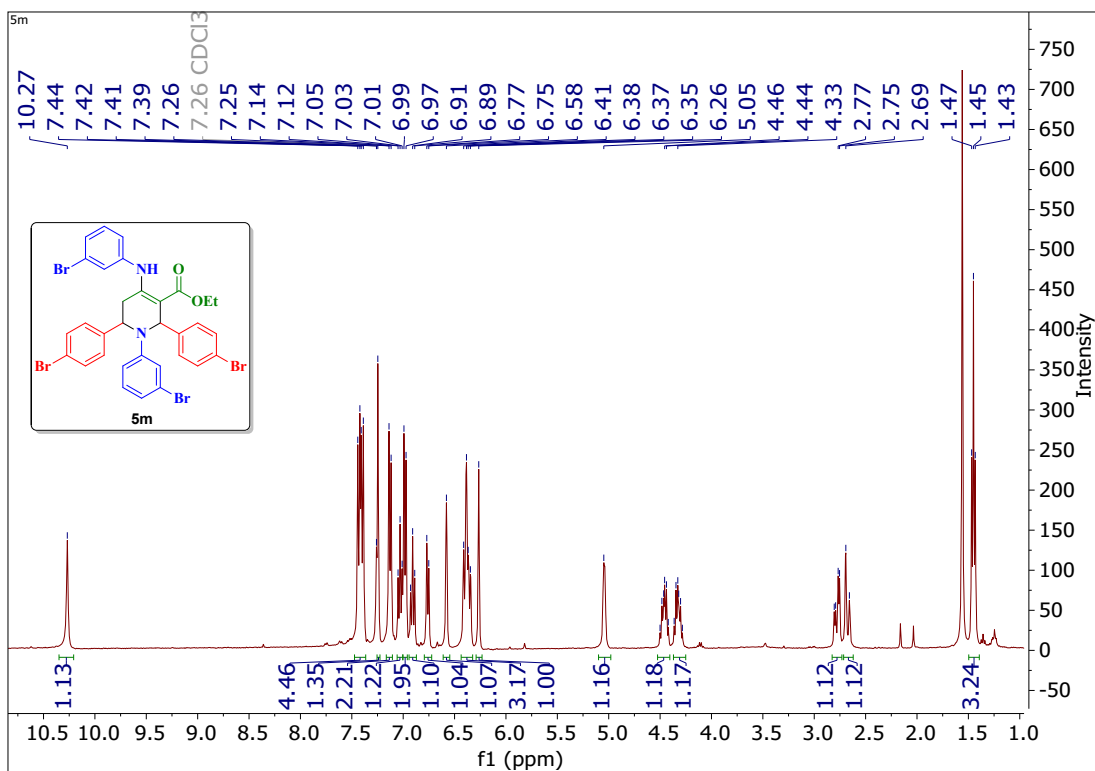

### <sup>13</sup>C NMR spectrum of 5m

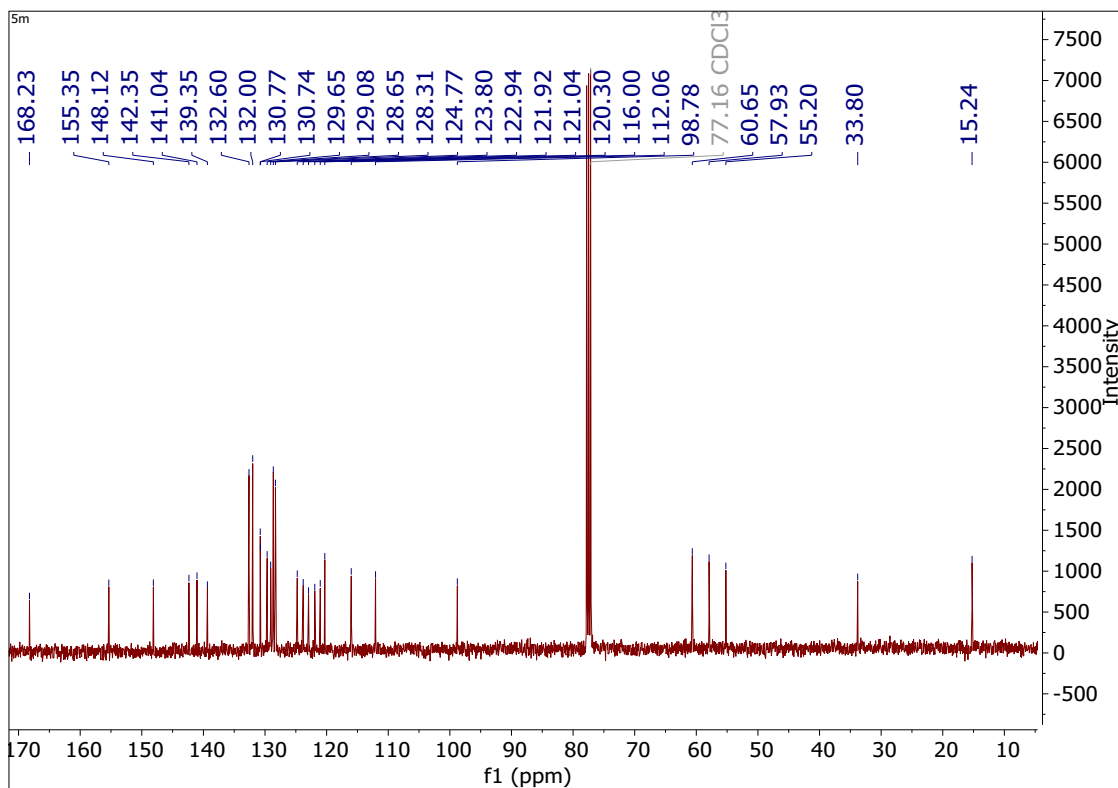

### <sup>1</sup>H NMR spectrum of 5n

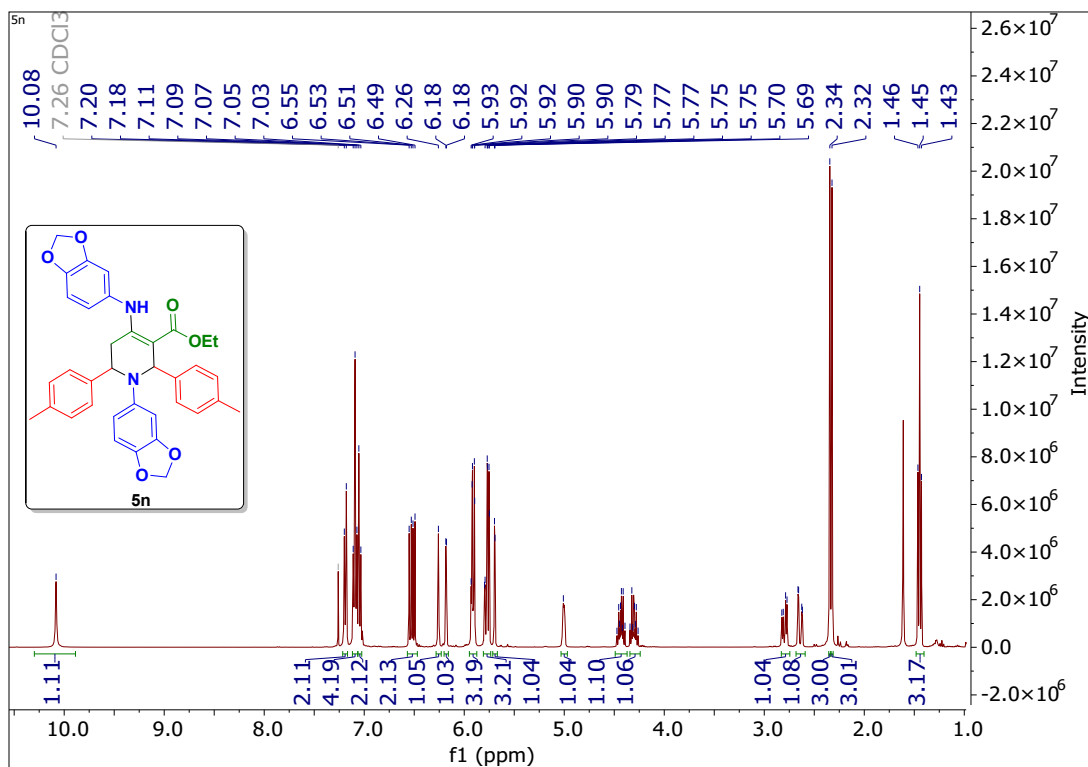

### <sup>13</sup>C NMR spectrum of 5n

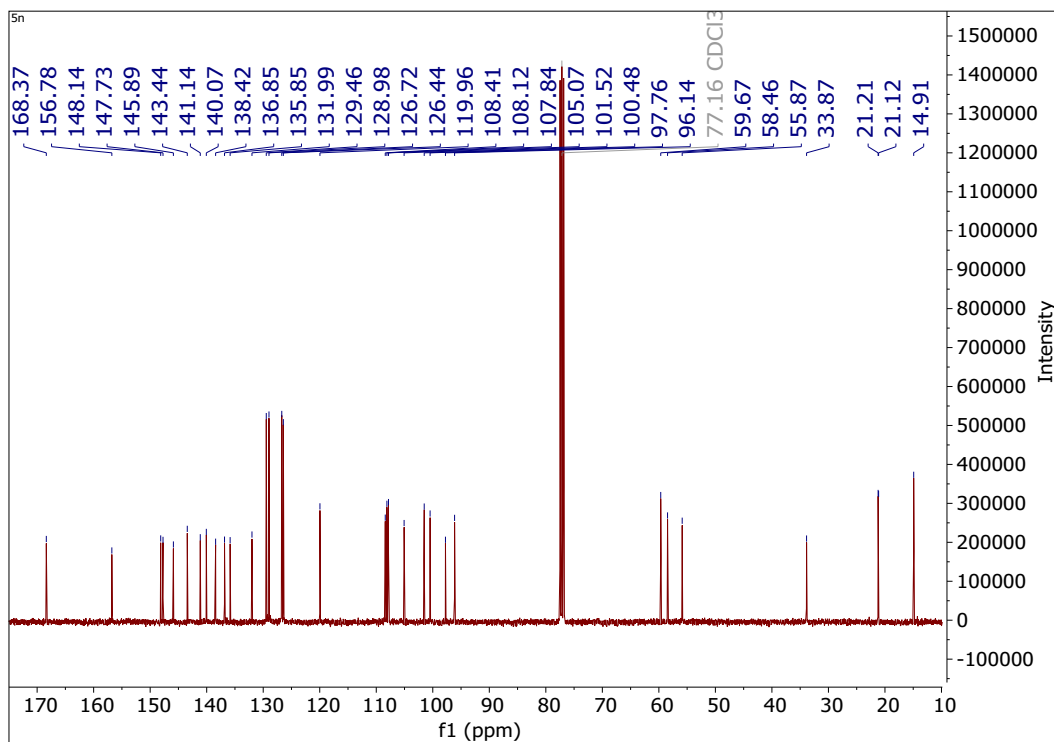

### <sup>1</sup>H NMR spectrum of 5o

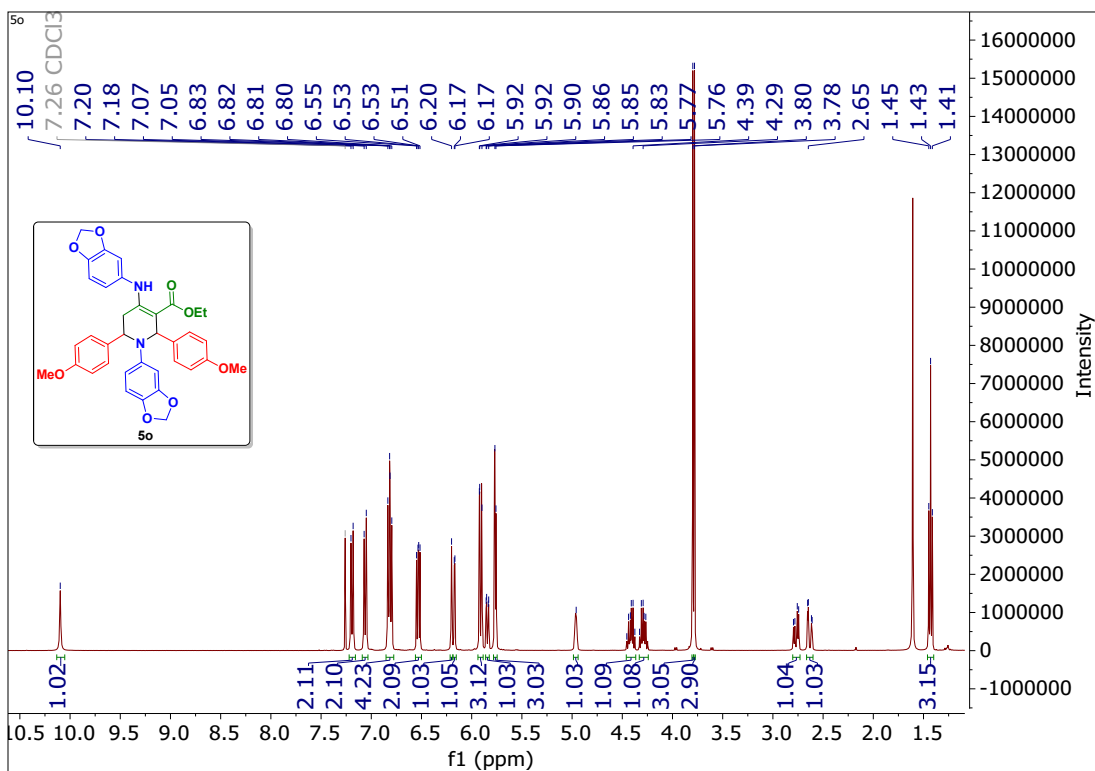

### <sup>13</sup>C NMR spectrum of 5o

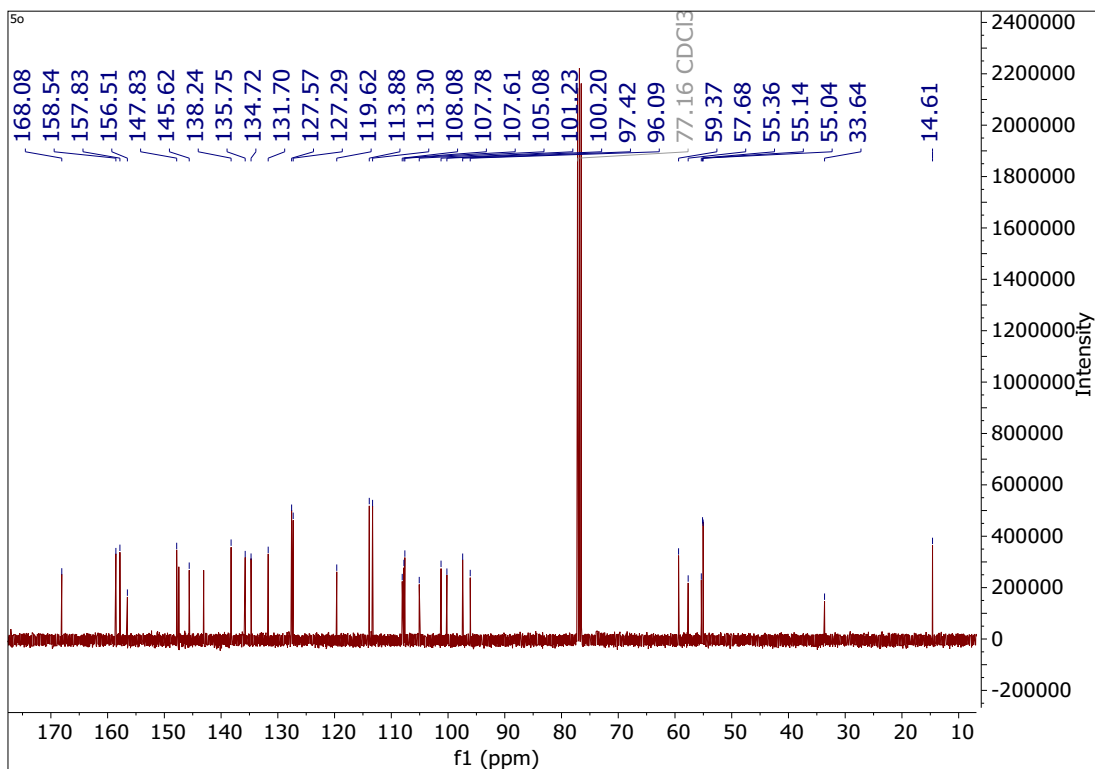

### <sup>1</sup>H NMR spectrum of 5p

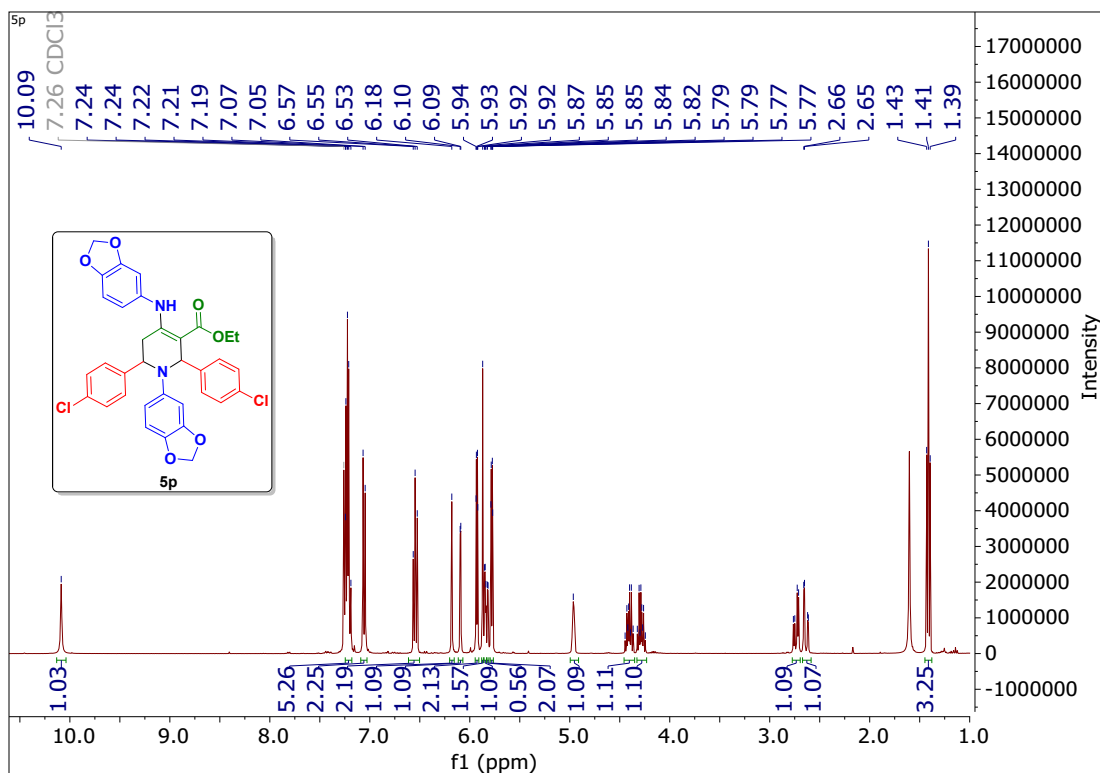

### <sup>13</sup>C NMR spectrum of 5p

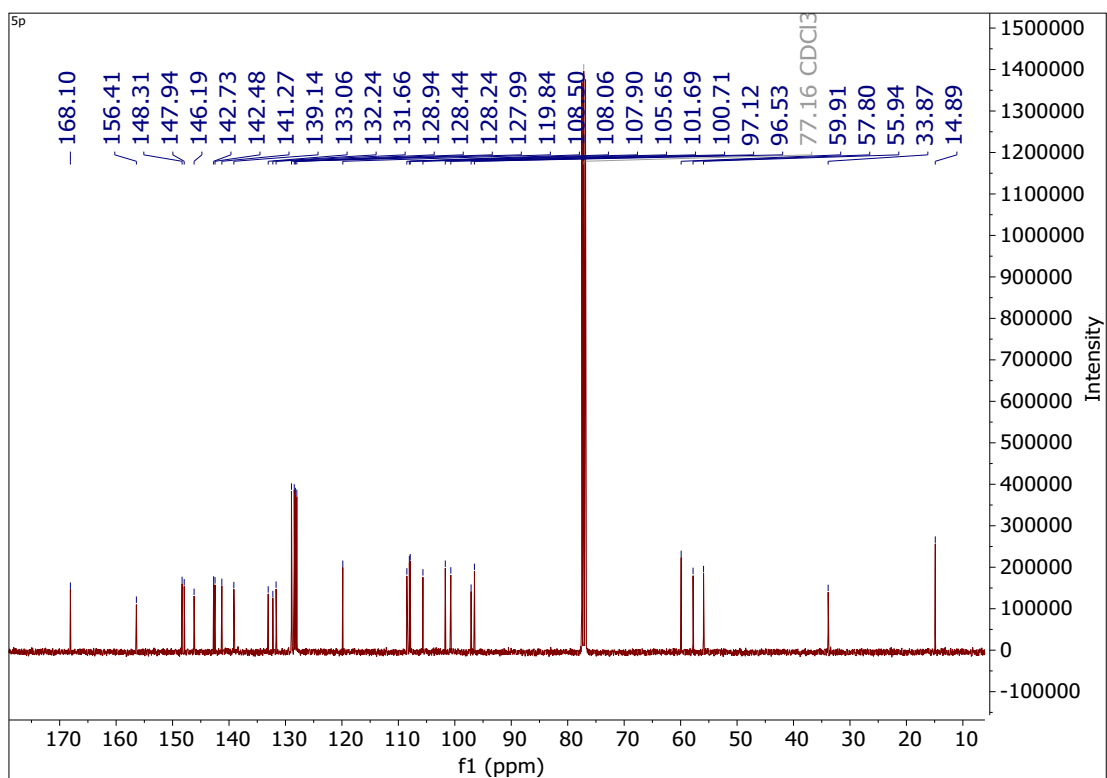

### <sup>1</sup>H NMR spectrum of 5q

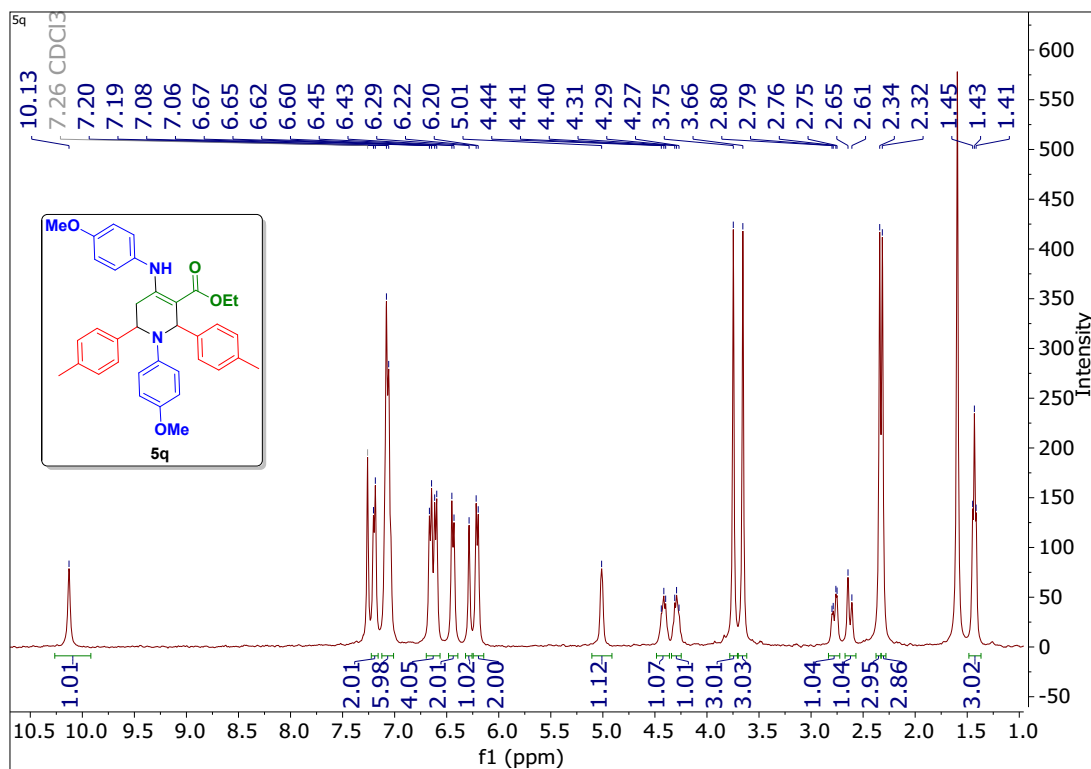

### <sup>13</sup>C NMR spectrum of 5q

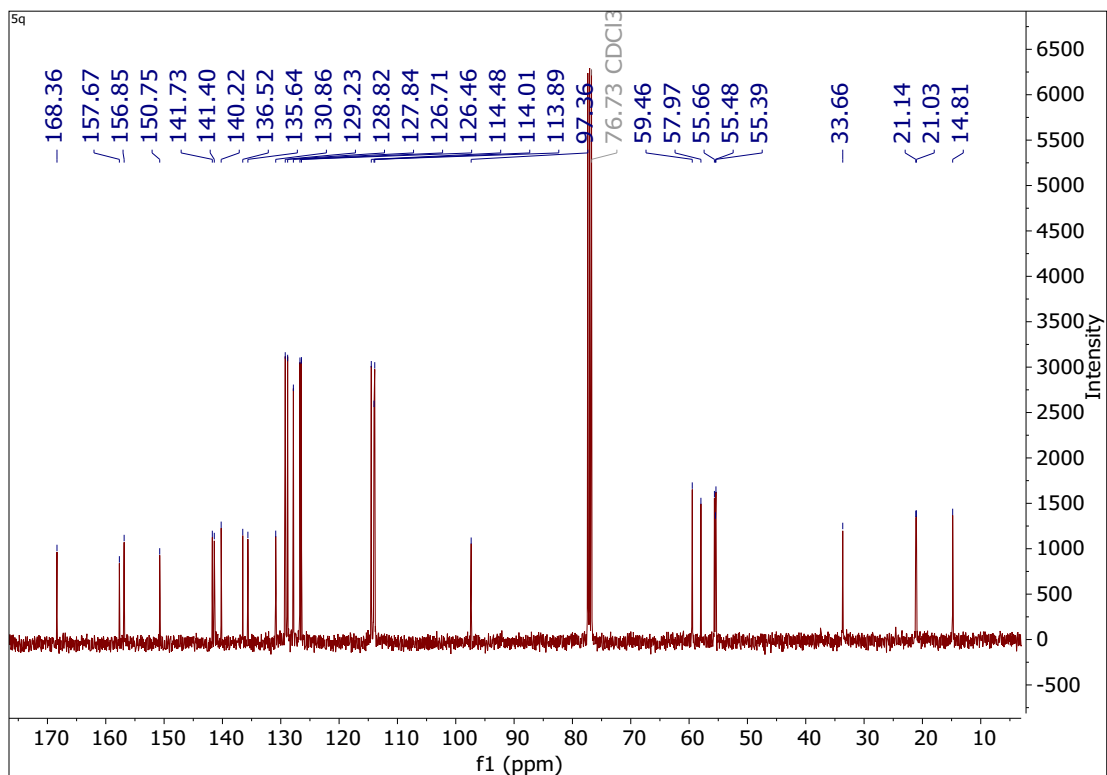



### <sup>1</sup>H NMR spectrum of 5r

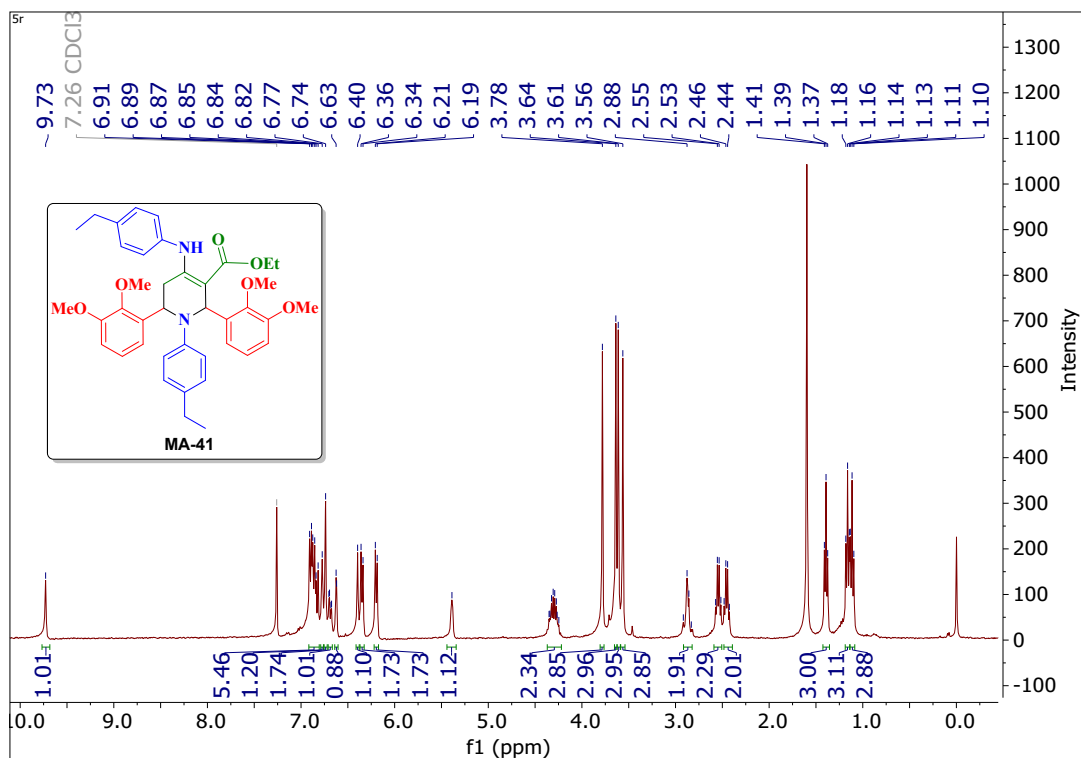

### <sup>13</sup>C NMR spectrum of 5r

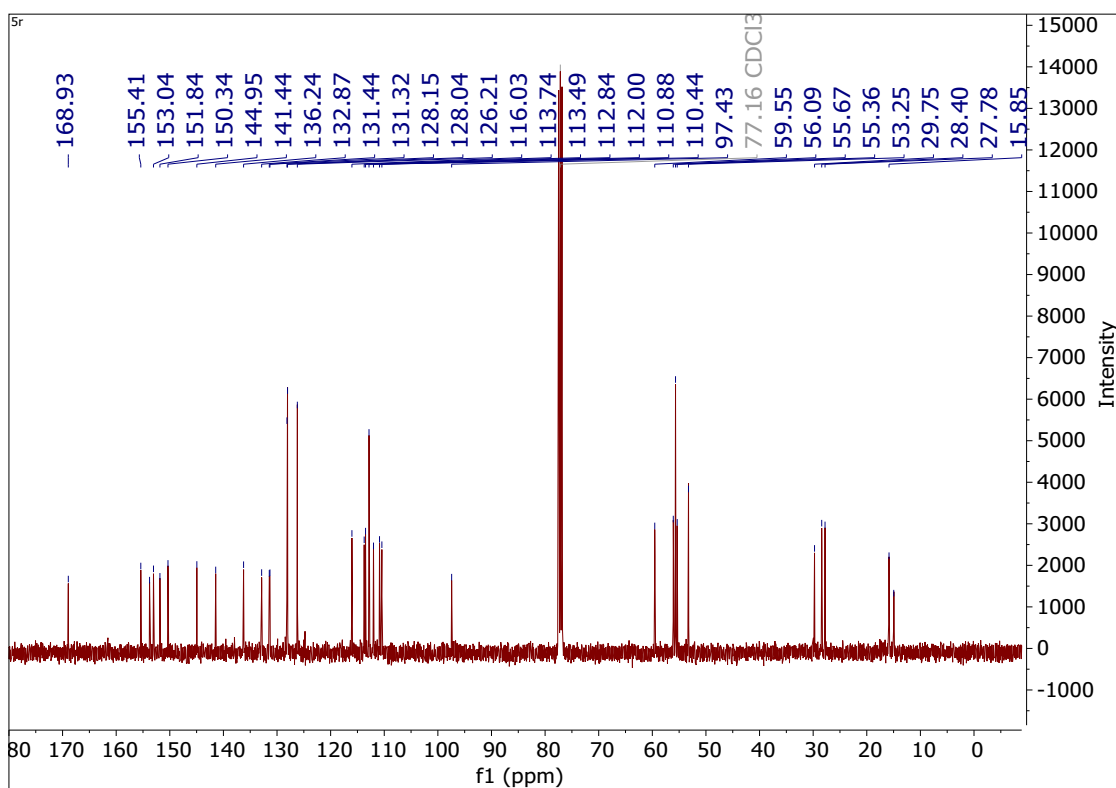

### <sup>1</sup>H NMR spectrum of 5r

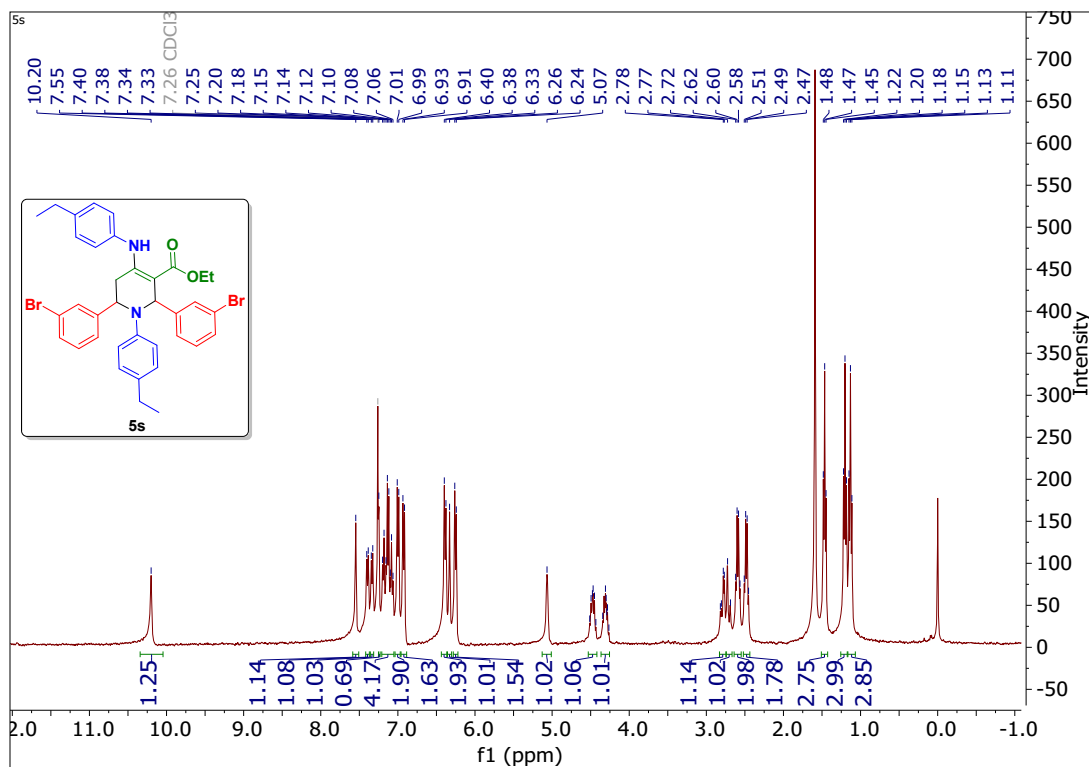

### <sup>13</sup>C NMR spectrum of 5r

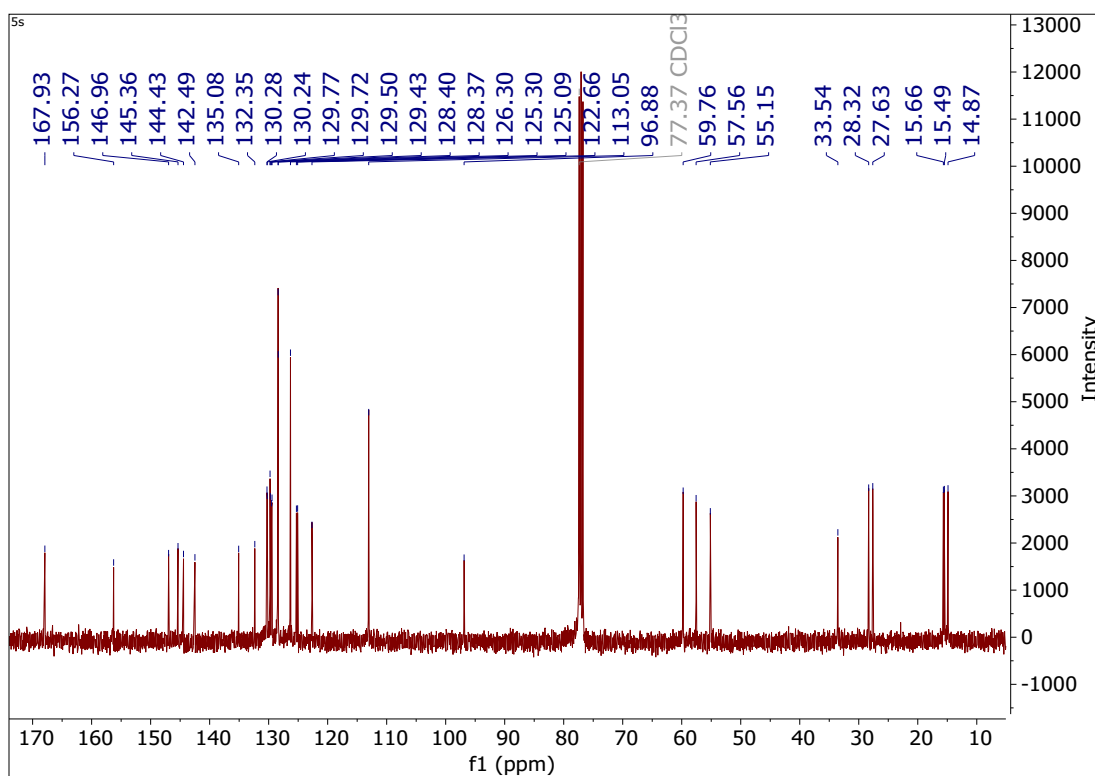

### <sup>1</sup>H NMR spectrum of 5t

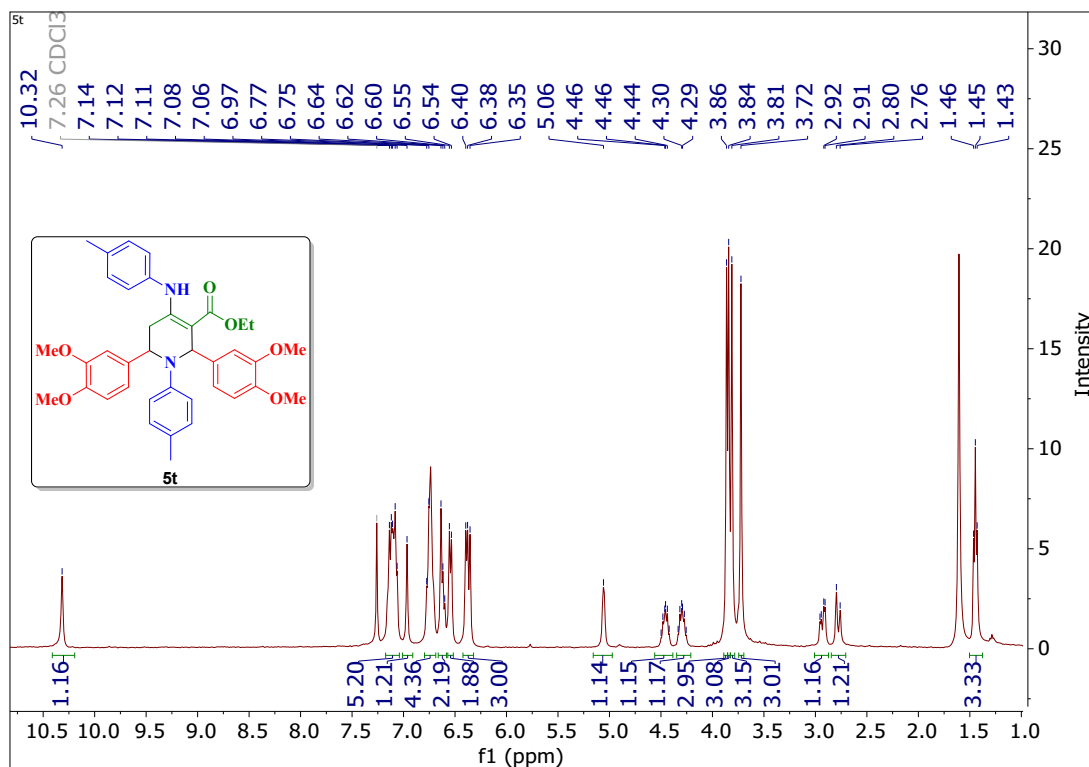

### <sup>13</sup>C NMR spectrum of 5t

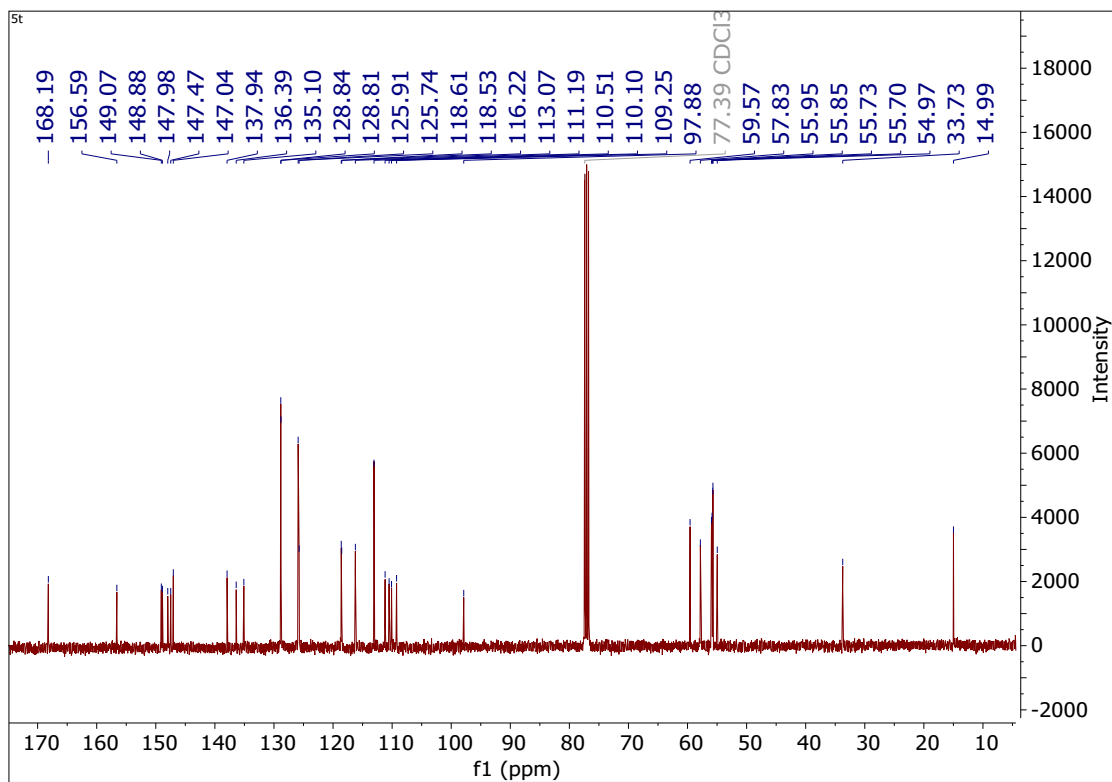

## IX. Evaluation of Anti-tubercular activities

### In-vitro *MTB* MABA assay

Briefly, the inoculum was prepared from fresh LJ medium re-suspended in 7H9-S medium (7H9 broth, 0.1% casitone, 0.5% glycerol, supplemented oleic acid, albumin, dextrose, and catalase [OADC]), adjusted to a OD<sub>590</sub> 1.0, and diluted 1:20; 100 µl was used as inoculum. Each drug stock solution was thawed and diluted in 7H9-S at four-fold the final highest concentration tested. Serial two-fold dilutions of each drug were prepared directly in a sterile 96-well microtiter plate using 100 µl 7H9-S. A growth control containing no antibiotic and a sterile control were also prepared on each plate. Sterile water was added to all perimetre wells to avoid evaporation during the incubation. The plate was covered, sealed in plastic bags and incubated at 37°C in normal atmosphere. After 7 days incubation, 30 µl of alamar blue solution was added to each well, and the plate was re-incubated overnight. A change in colour from blue (oxidised state) to pink (reduced) indicated the growth of bacteria, and the MIC was defined as the lowest concentration of drug that prevented this change in colour [S4, S5]

### References from supplementary information

- S1. Y. Li, N. Xu, J. Zhou, W. Zhu, L. Li, M. Dong, H. Yu, L. Wang, W. Liu and Z. Xie, *Biomater. Sci.*, 2018, **6**, 2918-2924.
- S2. S. Qiana, L. Song, L. Sun, X. Zhang, Z. Xin, J. Yin and S. Luan, *J. of Photochem. Photobiol. A: Chem.*, 2020, **400**, 112626-112652
- S3. P. Makula, M. Pacia and W. Macyk, *J. Phys. Chem. Lett.*, 2018, **9**, 6814-6817.
- S4. L. A. Collins and S. G. Franzblau, *Antimicrob. Agents Chemother.* 1997, **41**, 1004-1009.
- S5. V. S. Krishna, S. Zheng, E. M. Rekha, L.W. Guddat, and D. Sriram, *J. Comput. Mol. Des.*, 2019, **33**, 357-366.
